# Supplementary material for: Opposing roles of nuclear receptor HNF4α isoforms in colitis and colitis-associated colon cancer
Source: eLife. 2016 May 11;5:e10903. doi: 10.7554/eLife.10903 (PMC4907689; doi:10.7554/eLife.10903)
Supplement: Figure 5—source data 1. — (A) Top 100 genes DOWN in distal colon of α1HMZ male mice compared to WT controls. (B) Top 100 genes UP in distal colon of α1HMZ male mice compared to WT controls. (C) Top 100 genes DOWN in distal colon of α7HMZ male mice compared to WT controls. (D) Top 100 genes UP in distal colon of α7HMZ male mice compared to WT controls. (E) Up-regulated genes involved in wound healing and immune function enriched in α1HMZ mice. (F) Up-regulated genes involved in cell cycle and DNA repair in α7HMZ mice. (G) Down-regulated genes involved in cell adhesion and ion transport in α7HMZ mice. DOI: http://dx.doi.org/10.7554/eLife.10903.011 [file elife-10903-fig5-data1.xlsx]

## Sheet: A
Figure 5-source data 1A
Top 100 genes DOWN in distal colon of a1HMZ male mice compared to WT controls
Gene Symbol	WTα1	α1 HMZ	WTα1 v. α1 HMZ		Gene Symbol	WTα1	α1 HMZ	WTα1 v. α1 HMZ
	Value_1	Value_2	Fold change			Value_1	Value_2	Fold change
Myh1	919.545	6.88519	133.554		Hcn1	45.0507	6.57144	6.85554
Flg	671.018	7.37618	90.9709		Il1f6	54.9444	8.03468	6.83841
Krt4	684.034	7.68741	88.9811		Gm5414	64.5954	9.60762	6.72335
Scd3	496.939	7.26316	68.4192		Elovl4	161.969	24.3118	6.66214
Myh8	353.68	5.48628	64.4662		Pias3	106.581	16.1206	6.61149
Lce1a1	322.208	5.69087	56.6184		Olfr1198	48.841	7.39366	6.6058
Sprr3	858.713	16.338	52.5593		Lbx1	72.0123	10.9797	6.55869
Krt13	463.763	9.99161	46.4152		Defb6	68.8175	10.5447	6.52625
Hrnr	328.023	7.12405	46.0444		Chi3l3	44.7043	6.91728	6.4627
Krt10	737.919	16.7926	43.9432		Sh3kbp1	119.987	18.7408	6.40247
Krt1	1547.4	39.4317	39.2425		A930017M01Rik	425.419	66.6314	6.38466
Krt6a	538.001	13.8021	38.9796		Dsg1a	74.1295	12.0083	6.17319
Crct1	293.507	7.8225	37.5209		Gm4931	103.789	17.4286	5.95511
4833423E24Rik	102.59	3.68144	27.8667		2310005G13Rik	37.3979	6.36935	5.87154
Serpinb3a	172.395	6.66324	25.8725		Gm94	188.171	32.788	5.73903
Krtdap	91.6907	3.73846	24.5263		Calml3	91.5497	16.1346	5.67412
Psca	739.956	30.777	24.0425		Defb4	323.726	58.4954	5.53422
Dgat2l6	161.201	7.82339	20.605		Krt79	99.3166	18.0323	5.50772
Klk9	136.248	6.65431	20.4751		Tacstd2	42.0444	7.89168	5.32769
Krt5	131.849	6.908	19.0864		9930032O22Rik	30.7647	5.93266	5.18566
Gm5478	694.68	39.4369	17.615		Awat1	84.0438	16.399	5.12493
Dapl1	406.279	24.5168	16.5715		Lce1c	66.306	13.1225	5.05287
Krt6b	334.792	20.9182	16.0048		Ssxb10	32.8949	6.55715	5.01665
Svs5	201.02	13.0988	15.3465		Lce3c	48.4463	9.74444	4.97169
Cnfn	308.213	20.1491	15.2966		Dmkn	149.527	30.1441	4.9604
Fxyd4	757.863	53.0584	14.2836		Gm10881	3565.73	722.141	4.93772
Gm12447	3630.52	262.801	13.8147		B3galt6	180.329	36.7913	4.9014
Semg1	310.115	22.5144	13.7741		Spink5	175.339	36.1915	4.84475
Ppbp	601.074	45.1912	13.3007		Tmprss11a	66.3406	13.8252	4.79854
Serpinb12	109.818	8.34635	13.1576		Stfa1	148.884	31.1714	4.77631
Serpinb3d	116.201	8.85106	13.1285		Gm16432	38.8	8.1353	4.76934
Dsc1	110.726	8.59287	12.8858		Pkig	378.354	80.107	4.7231
Lor	222.134	17.6909	12.5564		Kprp	26.7945	5.71189	4.69099
Calm5	124.515	11.3101	11.0093		Vsig2	80.8268	17.5624	4.60228
BC100530	53.6718	4.89683	10.9605		Gm10778	41.8479	9.18332	4.55694
Tmprss11d	72.4095	6.66152	10.8698		Tex15	43.2272	9.6187	4.49408
Gm10693	149.252	15.0289	9.931		Krt16	567.57	126.503	4.4866
Krtap15	68.8197	7.41228	9.28456		4832428D23Rik	35.0256	7.85049	4.46158
Vtcn1	178.985	19.4987	9.17936		Trim29	330.338	74.1529	4.45482
Calm4	72.0736	7.97234	9.04046		Klk15	150.123	33.8267	4.438
Ltf	114.82	13.245	8.66888		Lgals7	370.268	84.046	4.40555
Asprv1	510.591	59.9452	8.51764		Klk14	408.795	93.4518	4.3744
Dsg3	62.3378	7.49755	8.31442		Ppp1r3a	22.1432	5.13677	4.31072
Expi	134.573	17.2949	7.78109		Atp13a4	39.3707	9.16053	4.29787
Krt14	165.286	21.8445	7.56649		Gm6862	1850.19	431.722	4.28561
Gm5476	824.46	111.895	7.36816		Dsg1b	23.5091	5.50643	4.26938
Trex2	185.795	25.3188	7.33823		Ankdd1b	202.918	48.3219	4.19929
Rptn	41.2958	5.81526	7.10127		Bphl	47.6527	11.352	4.19772
Alox12b	63.2503	9.0296	7.00478		Them5	183.465	43.7773	4.19088
Ephx4	171.161	24.6662	6.93909		Sprr1a	1849.52	442.284	4.18176

## Sheet: B
Figure 5-source data 1B
Top 100 genes UP in distal colon of α1HMZ male mice compared to WT controls
Gene Symbol	WTα1	α1 HMZ	α1 HMZ v. WTα1		Gene Symbol	WTα1	α1 HMZ	α1 HMZ v. WTα1
	Value_1	Value_2	Fold change			Value_1	Value_2	Fold change
Serpina1a	7.3223	2556.58	349.15		Fabp1	7.11486	376.801	52.9598
Mup3	26.5122	6812.24	256.947		EG214403	3.79579	191.141	50.3561
Cps1	10.6127	2460.46	231.841		Apoc3	40.4298	2021.43	49.9985
Kng1	7.80581	1606.97	205.868		F2	7.78019	383.774	49.3271
Mug1	4.55943	908.492	199.256		Apoa2	36.3298	1784.14	49.1096
Mup20	11.5903	2290.36	197.61		Akr1c20	5.53006	259.139	46.8601
Slc10a1	7.72938	1502.55	194.395		Fga	55.1942	2583.7	46.811
Cyp3a11	6.40258	1203.06	187.903		Cyp2c70	8.11173	374.104	46.1189
Gm4738	7.92521	1286.09	162.279		Itih4	7.25793	323.042	44.5089
Serpina1c	22.3972	3475.38	155.17		Slco1a1	4.66285	206.945	44.3817
Cyp2c29	5.49543	805.12	146.507		Serpina1e	54.0198	2312.72	42.8125
Kng2	10.4945	1389.68	132.42		AI182371	4.64284	196.151	42.2482
Bhmt	7.40827	954.106	128.789		Cyp4a31	4.89366	203.835	41.6528
Cyp3a41a	4.71013	603.108	128.045		Klkb1	8.59685	357.917	41.6335
Gc	46.5734	5825.73	125.087		Cyp2c53-ps	35.0654	1443.7	41.1716
Fgb	16.7795	1975.89	117.756		Serpinc1	71.669	2881.73	40.2088
Angptl3	6.17111	711.542	115.302		Serpina1d	107.823	4240.85	39.3316
Fgg	16.7548	1849.08	110.361		Es1	11.3633	434.37	38.2257
C9	7.61327	823.455	108.16		Cyp2a12	4.85506	183.596	37.8154
Cyp2c37	4.40864	440.705	99.964		Mup5	7.95209	291.617	36.6718
Ugt2b1	5.83978	579.137	99.1711		Slco1a6	4.54122	165.926	36.5378
Ahsg	25.9932	2462.01	94.7174		Itih1	5.53001	199.373	36.0529
Apoh	13.3025	1234.96	92.837		C9	4.03297	144.894	35.9275
Ugt2b36	11.123	1025.94	92.2358		Mat1a	17.2155	609.756	35.419
LOC673748	11.3533	1037.56	91.3879		Pon1	14.5928	513.652	35.199
Pzp	12.4204	1109.75	89.3493		Apoc4	32.3212	1133.39	35.0665
Alb	53.7386	4677.53	87.0422		Cpb2	25.9856	893.654	34.3903
Serpina3k	36.2518	3141.47	86.657		Hc	13.0507	448.174	34.341
Cyp4a12a	10.6349	919.957	86.5035		Saa4	10.6517	359.897	33.7876
Cpamd8	16.0659	1293.44	80.5084		Ugt3a2	6.90415	229.263	33.2065
Cyp4a12b	9.53978	746.252	78.2252		Mup2	283.139	9018.42	31.8515
Cyp2c54	5.22522	393.541	75.3156		Ugt2b5	7.66207	237.071	30.9408
Hrg	10.5442	758.829	71.9668		Mug4	14.528	434.826	29.9303
Fga	12.8027	921.241	71.9568		Rdh7	39.9467	1194.01	29.89
Cyp3a25	4.8427	333.757	68.9197		Cyp4a10	32.8981	958.326	29.1301
Apoa1	33.2148	2277.25	68.5614		Mup-ps3	93.9708	2662.04	28.3283
Uox	14.3506	979.485	68.2541		Aox3	8.89504	251.858	28.3144
Ambp	4.9759	336.088	67.5432		Serpind1	8.03969	226.656	28.1921
Plg	9.49496	640.058	67.4102		B430119L08Rik	47.6576	1337.7	28.0689
Slco1b2	6.57101	432.193	65.7727		Asgr1	4.59153	128.176	27.9157
Cyp2j5	7.25073	475.281	65.5494		Abcb11	9.18392	245.477	26.729
Serpina6	10.297	664.068	64.4917		Cyp1a2	25.4769	678.189	26.6198
Cyp2c50	8.29715	532.756	64.2095		Dmgdh	17.7904	468.722	26.3469
Hpx	36.921	2174.28	58.8901		Serpina3m	32.6908	854.871	26.1502
Es31	37.4261	2190	58.5154		Serpina3c	51.1838	1289.81	25.1997
Hgd	9.10374	526.198	57.8003		Amdhd1	4.49564	113.086	25.1545
Mat1a	23.6193	1353.95	57.3238		Gm7298	20.9104	522.601	24.9924
Hamp	10.4469	580.399	55.5569		Crp	20.2142	501.651	24.8168
Tdo2	10.2687	568.609	55.3728		Lect2	12.4233	299.819	24.1335
Serpina1b	76.5023	4183.19	54.6806		Slco1b2	4.11222	97.3894	23.6829

## Sheet: C
Figure 5-source data 1C
Top 100 genes DOWN in distal colon of α7HMZ male mice compared to WT controls
Gene Symbol	WTα7	α7 HMZ	WTα7 v. α7 HMZ		Gene Symbol	WTα7	α7 HMZ	WTα7 v. α7 HMZ
	Value_1	Value_2	Fold Change			Value_1	Value_2	Fold Change
Clec2e	760.149	15.1664	50.1206		Gm5941	24.7803	6.13429	4.03964
Hnf4a*	2525	76.7535	32.8975		Anks3	29.2268	7.24379	4.03474
Psmb5	79.1077	10.2768	7.69769		Ccdc49	72.4132	17.9805	4.02733
Cse1l	2071.27	302.646	6.84387		LOC100271704	54.0487	13.4778	4.01021
Olfr774	49.592	7.28754	6.80505		Myh2	33.3548	8.32651	4.00585
Hkdc1	42.5242	7.02022	6.05739		Cdh1	5116.03	1280.15	3.99643
Ccdc150	38.7446	6.55936	5.90677		Serhl	71.12	17.8155	3.99203
Gm9022	45.5576	7.75092	5.87771		A930038C07Rik	46.069	11.6033	3.97034
Alpk3	26.0578	4.43735	5.87236		Eif3m	44.3888	11.2917	3.93112
Ces6	93.4786	16.6556	5.61244		LOC432459	17.4482	4.46939	3.90394
1700018P08Rik	59.6787	10.7196	5.56726		Nol4	43.2598	11.1	3.89728
Gm8840	634.918	117.825	5.38865		Lpin2	28.5659	7.35666	3.88299
9130014G24Rik	40.4155	7.50128	5.38782		Ceacam2	1146.97	295.482	3.88171
Mfi2	84.5005	15.7978	5.34887		Gm9352	28.5231	7.35754	3.87671
Gm1082	61.1683	11.564	5.28954		Gm6145	44.5235	11.488	3.87566
Dnahc2	36.8307	6.99616	5.26442		Prkg2	37.1726	9.59932	3.87242
Il31	36.552	6.99245	5.22735		Olfr657	70.2736	18.2092	3.85924
Slc7a9	90.8615	17.4463	5.20806		Rnf121	40.6738	10.6021	3.8364
Apoc2	701.411	136.411	5.14191		Nrf1	25.4239	6.63991	3.82896
Gml	43.2651	8.46006	5.11404		Hdgfrp3	64.1397	16.7634	3.82616
Samsn1	24.2689	4.79424	5.0621		Cyp2d26	31.5565	8.27383	3.81402
4930486L24Rik	45.5538	9.17511	4.96493		Myh7	32.3985	8.53472	3.79608
Mei1	73.2071	15.1544	4.83076		Snx22	17.1407	4.52003	3.79216
Vmn2r106	34.1869	7.14327	4.78589		Wbp4	46.1086	12.1617	3.79129
LOC625240	27.4982	5.77315	4.76312		4930443B20Rik	79.0914	20.9205	3.78058
Tmc2	56.3103	11.9623	4.70731		1700067C01Rik	17.7004	4.70431	3.7626
Gjc2	42.6405	9.0729	4.69977		Lrrc23	87.4425	23.3176	3.75006
Opcml	59.9163	13.2535	4.52079		Bptf	36.7378	9.83449	3.73561
Serinc3	380.726	84.2304	4.52006		4933400C23	86.5507	23.1878	3.7326
Ppard	33.767	7.51942	4.49064		0610039K10Rik	39.6671	10.6282	3.73225
Emp1	30.2424	6.74865	4.48125		Olfr1031	16.6614	4.49282	3.70846
Otog	22.1927	4.96646	4.46851		Ccdc38	20.3526	5.49037	3.70697
Apobec3	105.398	23.6655	4.45363		4930485B16Rik	44.9676	12.1371	3.70499
Cyhr1	36.5497	8.21306	4.45019		Tomt	32.8525	8.87828	3.70033
Olfr910	43.3508	9.77225	4.43612		Tecta	63.0925	17.1125	3.68693
Gm10394	48.4454	10.9406	4.42804		Capn11	93.112	25.2594	3.68623
Rab24	32.1815	7.31021	4.40227		4930442B02Rik	24.2998	6.59861	3.68256
Alkbh6	41.3076	9.56427	4.31895		4930415F15Rik	107.915	29.3998	3.67062
Wfdc15a	39.4812	9.37309	4.21218		Gm6275	31.7204	8.66425	3.66107
Ms4a13	243.162	58.0371	4.18977		Ano5	70.6041	19.3459	3.64956
Ard1a	80.3181	19.243	4.17389		Klhl34	46.5547	12.786	3.64107
Tmem207	113.009	27.1335	4.16492		9130014G24Rik	38.3254	10.5516	3.63219
Olfr424	19.0375	4.57293	4.16308		Lrp1b	26.6868	7.38488	3.6137
Eml5	50.2045	12.1013	4.14867		D930007P13Rik	28.401	7.8768	3.60565
Ctnna3	24.1739	5.84551	4.13545		Mboat7	73.0694	20.2894	3.60136
C78653	44.4313	10.8114	4.10968		2810026P18Rik	64.2352	17.8986	3.58884
Fmn1	76.5337	18.6857	4.09584		E330016L19Rik	25.2411	7.05519	3.57767
Gm11426	31.3833	7.74367	4.05277		Gm9643	52.6259	14.762	3.56496
Apob	294.164	72.7999	4.04073		Mapk10	45.48	12.7617	3.56379
1700021G15Rik	77.6251	19.2143	4.03997		Tcp11l2	40.889	11.4765	3.56285
*Probe corresponds to Exon 1A (mm9 coordinates chr2: 163373042-163373145)

## Sheet: D
Figure 5-source data 1D
Top 100 genes UP in distal colon of α7HMZ male mice compared to WT controls
Gene Symbol	WTα7	α7 HMZ	α7 HMZ v. WTα7		Gene Symbol	WTα7	α7 HMZ	α7 HMZ v. WTα7
	Value_1	Value_2	Fold Change			Value_1	Value_2	Fold Change
5430419D17Rik	122.859	6.25736	19.6344		Haus5	56.6339	10.0983	5.60826
Scn4a	124.5	10.4094	11.9603		Trpm6	26.4319	4.75455	5.55928
Mrpl45	153.057	12.9552	11.8143		Fanca	926.24	167.165	5.54086
Msmb	83.846	7.35882	11.394		Lmbrd2	49.1264	8.89125	5.52525
Trp53i13	70.0748	7.00047	10.01		Gpr64	49.6657	9.02172	5.50512
Gm5168	82.6709	9.74981	8.47923		Ccdc76	48.2581	8.82685	5.4672
Morc1	147.238	17.432	8.44639		Mcts1	67.4594	12.3496	5.46247
Ifna1	84.4614	10.2516	8.23884		Tmem69	48.836	8.98431	5.4357
Micall1	31.4897	4.00555	7.86152		Mamdc4	41.584	7.65338	5.43342
Lrrfip2	167.041	21.4264	7.79602		Pik3c2g	111.3	20.6143	5.39916
Pick1	41.1354	5.30414	7.75533		St3gal6	37.7791	7.00147	5.39588
Ppp2r2d	71.9005	9.36301	7.6792		3200002M19Rik	103.889	19.2874	5.38636
Hmcn1	83.4974	10.8979	7.66182		Als2cr12	66.7642	12.4301	5.37116
Klra17	287.096	38.5091	7.45527		Apbb1ip	66.4016	12.4289	5.3425
D14Abb1e	364.975	49.2956	7.4038		Dhx57	150.312	28.1483	5.34001
Cyp3a25	51.4004	7.04961	7.29124		Fbxw13	46.5429	8.7354	5.32808
Rab27b	67.5853	9.69578	6.97058		Ccdc96	60.8352	11.5119	5.28454
Retnlb	183.191	1254.77	6.84954		Usp16	60.6542	11.5405	5.25578
Rg9mtd2	126.139	18.4442	6.83893		6720457D02Rik	30.0075	5.71545	5.25024
Zdhhc18	157.815	23.514	6.71151		Rnf160	125.052	23.9708	5.21685
Ttll5	71.6983	10.7562	6.66576		Gypa	49.1624	9.43181	5.2124
1110007A13Rik	36.6034	5.49149	6.66547		Casc5	47.7551	9.22311	5.17776
Rabggta	77.1265	11.6407	6.62557		P2rx1	131.923	25.5191	5.16957
Srcap	86.3093	13.0719	6.60268		D630032N06Rik	24.3766	4.7277	5.15611
Cep76	25.1468	3.83943	6.54961		Oasl2	345.94	67.6182	5.11608
Zfp445	27.8655	4.29457	6.48855		Gnl3	184.681	36.4597	5.06533
Ccrn4l	54.8766	8.46591	6.48207		Ms4a5	155.757	30.7887	5.05891
Chrdl1	70.6795	10.9155	6.47516		Ncam2	34.1906	6.76617	5.05317
F12	51.4133	8.01489	6.41472		Fkbp7	115.405	22.9595	5.02646
AI324046	526.427	82.8693	6.3525		Rps6kc1	39.0375	7.78901	5.01187
Ang4	128.603	20.3962	6.30526		Gm13051	93.8137	18.747	5.00419
Snx29	108.054	17.2611	6.25996		Ttpa	38.0141	7.61388	4.99274
AI506816	29.8446	4.85017	6.15331		Csdc2	40.8389	8.18327	4.99054
4922501C03Rik	38.0572	6.2023	6.13597		Gng5	29.2404	5.87687	4.9755
3110049J23Rik	85.1451	14.1059	6.03616		Csta	92.6731	18.7005	4.95566
Ttc25	53.6994	9.01542	5.95639		Zfyve16	403.887	81.5794	4.95084
Prl3d2	111.625	18.786	5.94192		Gm4759	108.064	21.9195	4.93003
Dnahc5	139.854	23.5407	5.94095		Sphkap	107.507	21.8309	4.92455
Odf2	44.1601	7.46974	5.91186		BC057079	86.8979	17.6488	4.92373
1110028C15Rik	71.6866	12.1698	5.89052		Spg7	33.6855	6.84565	4.92071
4930432K21Rik	95.6959	16.2652	5.88348		Wdr35	106.128	21.6713	4.89716
Dync2h1	376.912	65.075	5.79197		Ndufb4	34.2435	6.99405	4.89609
Fam55a	74.165	12.8102	5.78955		Gbp3	112.56	23.1455	4.86315
Ncoa4	57.1884	9.87907	5.78884		Scoc	39.3591	8.09854	4.86003
2700086A05Rik	43.4118	7.53749	5.75945		Ranbp17	37.4104	7.7148	4.84918
Kif23	80.5158	14.1352	5.69611		Klk15	633.329	130.78	4.84271
Unc13b	62.7023	11.0224	5.68864		Mapk1ip1	32.202	6.66512	4.83142
Col18a1	37.1507	6.53194	5.68755		Frmd6	54.0602	11.3471	4.76423
Nckap1	103.825	18.353	5.65711		Cd2ap	40.1389	8.45672	4.74639
Zcchc6	68.6807	12.1653	5.6456		Gemin8	88.9884	18.851	4.72062

## Sheet: E
Figure 5-source data 1E
Up-regulated genes involved in wound healing and immune function enriched in α1 HMZ mice
Gene symbol	Fold Change v. WT control (non log)			Gene symbol	Fold Change v. WT control (non log)
	α1 HMZ	α7 HMZ			α1 HMZ	α7 HMZ
Fgg	31.2119	4.45627		F11	3.1148	1.80079
Ahsg	30.8687	3.79662		Vnn1	2.97166	1.84617
Kng1	30.7083	3.05957		Ccl20	2.96013	1.25491
Fgb	29.2659	3.28304		Oasl2	2.93447	2.8863
Serpina1a	28.6507	3.02627		Proz	2.93305	1.02444
Serpina1b	27.6461	4.00421		Mbl2	2.8992	0.988769
Hpx	19.125	2.22947		Arg1	2.6993	1.91036
C9	14.4427	1.64809		Cxcl11	2.65534	1.80135
Apoh	13.8321	2.07686		Il12b	2.58155	0.71855
Saa4	13.7664	1.60662		Trf	2.554	1.31001
Crp	13.652	1.91996		C4bp	2.51834	1.47343
Plg	13.1212	1.80475		Ciita	2.45701	1.71248
Fga	12.8306	2.22943		Masp1	2.40734	1.36781
Serpinc1	11.9274	1.65511		Gbp10	2.32545	1.10367
Azgp1	11.9252	3.83453		Rnf125	2.30463	0.855972
AI182371	11.861	2.28829		C3	2.28207	1.40176
Serpind1	11.3019	2.13042		F7	2.27697	1.41185
Hc	9.53669	1.83377		Apoa4	2.26487	1.53355
Masp2	8.59042	1.22465		Nos2	2.20809	1.31655
F2	7.66625	1.67964		Tmprss6	2.20741	0.679604
Klkb1	7.44456	1.45378		Ada	2.20264	2.57464
Serpinf2	6.96891	1.31051		Ephx2	2.18683	1.32454
F13b	6.91285	0.975111		Prg4	2.17051	0.720055
C8g	6.77518	0.94059		Ppara	2.1336	1.19178
C8b	6.51401	1.98017		Tfpi	2.12206	0.777766
Cfi	6.41767	1.45041		Mst1	2.10198	1.06855
Orm1	6.00324	2.56359		Cr2	2.04071	1.53632
Hrg	5.99493	1.48297		H2-gs10	2.00816	1.07233
F10	5.52442	1.59499		Cfb	2.00565	0.934938
Orm3	5.35644	1.68986
H2-T3	4.9477	0.592527
F9	4.86364	1.15771
F5	4.57028	1.5627
Ang4	4.56708	6.52824
F12	4.32684	1.3367
C8a	4.32062	1.46935
Proc	4.05863	1.08633
H2-Q10	3.96996	1.80147
Orm2	3.75842	1.11129
Ccl25	3.64904	1.56986
Mbl1	3.6441	1.17112
F8	3.47723	1.19754
Slc7a2	3.47177	1.9017

## Sheet: F
Figure 5-source data 1F
Up-regulated genes involved in cell cycle and DNA repair in α7 HMZ mice
Gene symbol	Fold Change v. WT control (non log)			Gene symbol	Fold Change v. WT control (non log)
	α7 HMZ	α1 HMZ			α7 HMZ	α1 HMZ
Cell cycle				DNA repair
Haus5	5.7914	0.850221		Fanca	5.69322	1.21916
Mcts1	5.46461	1.17457		Smc5	4.5735	1.75644
Cd2ap	5.27447	1.24213		Supt16h	4.38745	1.43417
Usp16	5.19686	1.17871		Esco1	4.16907	1.21138
Mapk1ip1	4.81884	0.854623		Rev1	3.59115	0.621828
Kif20b	4.49589	0.922922		Hmgb2	3.3219	1.39797
Cep63	4.45769	1.27438		Mbd4	3.2104	1.0544
Bub1	4.27952	2.43716		Epc2	3.17145	0.547464
Stag1	3.97255	1.34939		Fanci	3.17142	1.0644
App	3.93986	1.33779		Dclre1c	3.1575	0.946687
Ncapg2	3.88268	1.36384		Aplf	3.10886	1.40449
Appl1	3.69341	0.663483		Rev3l	2.99774	1.26686
Smc4	3.55447	1.28211		Gen1	2.85991	1.01619
Pcnp	3.50272	0.879483		Brca2	2.84681	1.22516
Mael	3.44898	1.46507		Fancd2	2.80951	1.00961
Banp	3.43544	1.5156		Brca1	2.74829	1.554
Nasp	3.36458	1.26868		Shprh	2.7378	0.976879
Cep110	3.26456	0.775464		Mlh1	2.72674	0.834083
Atr	3.26423	1.28603		Parp1	2.7015	1.7538
Sgol2	3.2396	1.30614		Fbxo18	2.69917	1.54471
Sgol1	3.23949	1.39592		Trp53bp1	2.66791	1.60727
Piwil4	3.19555	1.2665		Atrx	2.65244	0.849907
Gm9049	3.17332	1.15109		Neil2	2.59921	2.23164
Atm	3.12117	1.12695		Alkbh3	2.53457	0.960857
Cep72	3.11355	1.84442		Fam175a	2.42816	2.00641
Rb1cc1	3.06465	0.982695		Pola1	2.39108	2.0999
Kntc1	3.03804	1.28871		Ube2n	2.36124	0.991372
E2f5	3.01736	1.02888		Fancl	2.32991	0.574206
Ppp3ca	2.98445	0.917197		Prkdc	2.31698	0.998204
Rock1	2.9132	1.21798		Bard1	2.31055	0.775612
Haus2	2.90445	0.868998		Poln	2.28948	1.88482
Mtbp	2.87606	1.55728		Ints3	2.26438	1.29863
Smc2	2.85358	1.36415		Rad17	2.2195	1.48196
Phgdh	2.8457	0.719764		Topbp1	2.21867	1.0556
Aspm	2.82807	1.05242		Rnf8	2.16082	1.08006
Nek11	2.80679	1.2398		Setx	2.12064	1.20993
Kif18a	2.77936	0.751553		Msh5	2.11429	1.09348
Nipbl	2.73106	1.09048		Gm7843	2.08387	1.01441
Camk2g	2.72151	0.78774		Eya2	2.07312	0.45623
Ddit3	2.71366	0.688813		Polb	2.06922	1.25187
Akap8	2.67781	1.69943		Xrn2	2.06288	1.11107
Rabgap1	2.67561	1.12692		Mlh3	2.0333	1.11035
Cryaa	2.67122	1.30569		Polk	2.03182	0.794108
Cdk6	2.66389	1.94805		Parp2	2.00682	1.12089
Mdm2	2.6597	1.15249		Smc6	2.00272	1.26127
Zbtb16	2.65326	0.667963
Rbbp4	2.64596	0.809897
Tlk2	2.63211	1.15427
Top2a	2.61935	0.889519
Dmtf1	2.61114	1.11957
Anxa1	2.59312	0.57239
Evi5	2.53447	1.48677
Gm4835	2.50979	0.831544
Pcnt	2.49483	1.10369
Ubr2	2.48347	1.15124
Camk2a	2.48338	0.779693
Nek1	2.48302	1.90433
Nae1	2.4823	0.797491
Rb1	2.47681	1.1958
Rpl24	2.46402	0.805026
Top1	2.44773	1.54209
Strada	2.44733	1.00805
Mki67	2.44088	1.28577
E2f3	2.43405	1.55111
Anapc5	2.39998	0.838895
Haus7	2.38821	1.24696
Dst	2.38566	1.10777
Zwilch	2.38486	1.0333
Sgsm3	2.35701	1.03012
Anapc4	2.34473	0.785509
Senp5	2.34049	1.23117
Llgl2	2.33682	1.22296
Pafah1b1	2.32312	0.525821
Nup37	2.31033	0.753974
Gm8096	2.30804	0.996816
Ckap5	2.28431	1.01198
Cep250	2.27924	1.5753
Pik3cb	2.27903	0.803892
Gas2l3	2.2785	0.778046
Tet2	2.27271	1.08491
Myh10	2.27184	0.822903
Prc1	2.26982	0.93241
Pds5b	2.26631	0.967149
Cdc26	2.25975	1.47585
Macf1	2.25532	1.00363
Cks1b	2.25076	1.13871
Terf1	2.22567	1.13541
Arl8b	2.2255	0.841468
Atf6b	2.22525	1.2122
Cdk7	2.21959	2.11631
Smc3	2.21854	1.01977
Clasp1	2.20548	1.18631
Aatf	2.19588	1.40748
Lin9	2.18338	1.65924
Casp8ap2	2.1763	1.08923
Ncapd3	2.17513	1.88507
Cdc25b	2.17029	1.04364
Nr2c2	2.17014	1.21253
Prdm5	2.16193	0.731014
Ccna2	2.16049	1.11341
Cenpe	2.15811	0.917346
Lats2	2.14406	0.982219
Vps24	2.12902	0.793771
Mns1	2.10761	0.851587
Npm1	2.10531	0.952483
Utp14b	2.09843	1.18649
C79407	2.09834	0.93958
Nek9	2.09581	1.66187
Nedd1	2.09188	1.21092
Psme3	2.08135	1.06213
Pard3	2.07697	1.54927
Zfp655	2.07478	1.48493
Kat2b	2.05952	1.20681
Haus4	2.05741	1.03585
Stag2	2.05655	1.18965
Pdpn	2.05103	0.577289
Ercc6l	2.05035	1.42912
Uhmk1	2.04954	1.26321
Fmn2	2.03514	0.780639
Anapc1	2.03056	1.03412
Nek3	2.0276	0.921236
Clasp2	2.01759	1.11652
Seh1l	2.01457	0.879553
Khdrbs1	2.0104	0.934774

## Sheet: G
Figure 5-source data 1G
Down-regulated genes involved in cell adhesion and ion transport in α7 HMZ mice
Gene symbol	Fold Change v. WT control (non log)			Gene symbol	Fold Change v. WT control (non log)
	α7 HMZ	α1 HMZ			α7 HMZ	α1 HMZ
Cell adhesion				Ion transport
Ppard	-4.49064	2.04101		Mfi2	-5.34887	0.757262
Otog	-4.46851	1.06182		Ano5	-3.64956	1.40702
Ctnna3	-4.13545	1.15173		Pkd2l1	-3.53763	0.443244
Cdh1	-3.99643	0.923601		Trpc1	-3.20824	1.01719
Tecta	-3.68693	0.828214		Cttnbp2	-3.09895	1.04064
Itgb2l	-3.48577	1.35281		Kcnc1	-3.05475	1.65818
Nell2	-3.12318	1.66652		Slc17a7	-3.01671	1.12669
Klra5	-2.9228	1.45998		Ryr3	-2.96639	1.416
Vwf	-2.89487	1.75991		Kcnmb2	-2.95837	0.967806
Cdh16	-2.83239	1.28531		Gabre	-2.7949	0.826527
Col13a1	-2.58045	0.78716		Slc5a5	-2.77558	1.08408
Pcdhb1	-2.53476	0.883755		Fxyd2	-2.75054	1.74834
Csf3r	-2.40124	0.660392		Trpc5	-2.69838	1.29093
Gm14025	-2.39996	1.31972		Slc12a1	-2.60773	1.3044
Myf5	-2.36253	1.4102		Grin2b	-2.59132	1.65855
Dsc3	-2.3607	1.99487		Kcnh4	-2.57948	0.826849
Dsg4	-2.32833	0.438513		Slc17a6	-2.56503	1.21771
Tyro3	-2.27207	0.688798		Chrne	-2.52957	1.17099
Tnr	-2.24986	1.03991		Scnn1a	-2.50896	0.926539
Cdh23	-2.24683	0.993842		Trpm3	-2.49715	1.51743
Cass4	-2.24269	0.452144		Scn3a	-2.47148	1.52587
Antxr1	-2.23323	1.06662		Nhedc2	-2.42669	1.00938
Amtn	-2.22086	0.761535		Heph	-2.42338	0.854924
Tnn	-2.21594	1.0062		Catsper1	-2.41372	1.5842
Lama1	-2.2114	0.82347		Kcnip1	-2.40612	1.76797
Dnajb6	-2.20621	0.89965		Kcns1	-2.39893	1.45406
Angptl3	-2.20041	1.34676		Cnga1	-2.3636	0.564037
Gp1ba	-2.16516	0.770807		Slc39a7	-2.35433	0.874691
Podxl2	-2.15452	0.919375		Accn2	-2.33733	1.4398
Dscaml1	-2.11848	0.796946		Chrna4	-2.33655	1.00814
Icam2	-2.11435	0.892278		Kcnu1	-2.32808	0.827311
Col4a3	-2.09858	0.801376		Cacna1e	-2.30517	0.912026
Stab1	-2.09698	1.36873		Best3	-2.29815	1.60639
Arvcf	-2.09157	1.0013		Slc34a2	-2.26871	0.586426
Cldn16	-2.05662	1.27977		Ryr2	-2.25777	1.54406
Lamc3	-2.05132	1.28499		Kcnn2	-2.24457	0.802017
Cdh18	-2.03527	0.87579		Kcnk16	-2.23484	0.912686
Adam12	-2.0345	0.713218		Grin2c	-2.22796	0.809798
Cntnap5b	-2.02847	0.935242		Slc4a1	-2.22703	1.37696
Sned1	-2.0228	1.96429		Atp13a4	-2.20274	1.45558
Hapln4	-2.01683	1.11375		Kcnj15	-2.16524	1.02918
Dlg1	-2.01121	0.968492		Trpm1	-2.15725	1.05465
Abl1	-2.00595	1.04936		Slco6c1	-2.15155	1.07142
				Stim1	-2.1235	1.88876
				Grid2	-2.10349	1.43901
				Slc26a4	-2.09675	0.73041
				Scn10a	-2.08571	1.96323
				Scn1a	-2.07922	0.425867
				Cldn16	-2.05662	1.27977
				Slc26a5	-2.05426	0.765731
				Kcnip4	-2.05008	1.44897
				Ttyh2	-2.04479	0.88631
				Trpv6	-2.03089	0.94502
				Slc24a2	-2.02851	0.717009
				Slc9a1	-2.02844	0.938587
				Kcnk10	-2.01498	1.02719
