# Supplementary material for: Opposing roles of nuclear receptor HNF4α isoforms in colitis and colitis-associated colon cancer
Source: eLife. 2016 May 11;5:e10903. doi: 10.7554/eLife.10903 (PMC4907689; doi:10.7554/eLife.10903)
Supplement: Figure 5—source data 2. — (A) List of proteins that interact with HNF4α in α1HMZ and α7HMZ colons from RIME analysis meeting the criteria described in Figure 5C. (B) Select proteins that interact with HNF4α in α1HMZ and α7HMZ colons from RIME analysis used to prepare the graph in Figure 5C. (C) All peptides that interact with HNF4α in both α7HMZ and α1HMZ colons from RIME analysis in which there are at least 2 positives for each genotype. (D) All peptides that interact with HNF4α preferentially in α7HMZ colons in which there are 2 or more positives for α7HMZ compared to α1HMZ. (E) All peptides that interact with HNF4α preferentially in α1HMZ colons in which there are 2 or more positives for α1HMZ compared to α7HMZ. Figure 5C. DOI: http://dx.doi.org/10.7554/eLife.10903.012 [file elife-10903-fig5-data2.xlsx]

## Sheet: A 
Figure 5-source data 2A
All proteins that interact with HNF4a in a1HMZ and a7HMZ colons from RIME analysis meeting the criteria described in Figure 5C.
a1HMZ and a7HMZ		a7HMZ unique		a1HMZ unique
ACTR3		AAK1		AKR1C19
AGO2		ABCF1		AKT1
ANP32A		AFAP1		ALDH1A2
ARHGEF1		AGL		ARPC1A
ARPC2		AI314180		ATP2A1
ATL3		AKR1C14		ATP2A3
BAG3		ALDH7A1		CAPN1
C1QC		ARL8A		CAPZB
CAPN2		ARPC4		CASP1
CAV1		ATAD3A		CDIPT
CAV3		AW549877		COL6A3
CHMP1A		BTF3		COPB2
CLIC1		C4A		CRNKL1
CPNE2		C4B		DBN1
CPNE4		CAD		DCLK1
CPNE5		CALD1		DCTN1
CPNE6		CAMK2B		DCTN5
CPNE7		CCT3		DDX1
CPNE8		CCT5		DIAPH1
CPNE9		CDC37		DNAJC13
CUL1		CDC42BPB		ECI1
DDX6		CHDH		EIF2A
DMD		CKM		EIF3E
DNAJB4		CNN2		EMD
DNAJB5		COPZ1		ENAH
DPF2		CPEB2		ESRRA
DST		CPEB3		FIS1
DYNLL2		CPEB4		GBP2
EIF4G2		CRYAB		GM8894
EML4		CUL4A		HACD3
EPS15		CYB5R3		HERC4
ETF1		CYFIP1		ISOC1
FAM98A		DCTN2		ITGA5
GBE1		DNPEP		KLC2
GMPPA		DPYSL3		KLHL41
GSPT1		DUSP3		LANCL1
GSPT2		EHD3		LDB3
GUCY1B3		EHD4		LOC102638521
HNF4A		EIF2S3X		MB
HNF4G		EIF2S3Y		ME1
IFI35		EIF4A2		MFN2
INPP1		EIF5		MOGS
INPP4A		EML1		MRVI1
ITIH3		ETFB		MYH6
LDHB		FBLIM1		MYH9
LRBA		FERMT2		NACAD
MACF1		FLNA		NCKAP1
MAP7		FLNB		NDRG2
NARS2		GARS		NDUFA1
NDE1		GNAI2		NEDD4
NDEL1		GSN		NPLOC4
NEDD8		HDLBP		OGDH
NES		HMGCL		PABPC1
NRIP1		HSPA2		PDCD5
OSBP		IGF2BP2		PDHA1
PDE5A		IGHG		PDHB
PON1		IPO5		PDLIM5
PPID		IQGAP1		PICALM
PRKACB		ITIH2		PITPNA
PSMD5		ITPR1		PKLR
RAB6A		ITPR2		PPA1
RARS		ITPR3		PPM1E
SAMD4		KANK1		PPP2R2A
SEC24C		KARS		PPP2R2B
SLC1A5		LGALS9		PPP2R2D
SPHK2		LIMA1		PRKAA1
SPTBN4		LOC100503296		PRKAA2
SRP19		MAOB		PRKCD
SRP72		MAPRE2		PRUNE
STARD10		MYH11		PSMA2
SYNC		MYOF		PSMA3
TRIM28		MYZAP		PSMB1
USP7		NAP1L1		PSMC1
VIM		NAPG		PSMD8
VPS35		NDUFA6		PTPLAD1
ZC3H14		NHLRC2		RAB6B
		NPM1		RAP1A
		PABPC4		ROCK2
		PCM1		RPL13A
		PDCD6IP		RPS6KA2
		PDLIM7		RPS6KA3
		PEBP1		SCT
		PFKP		SEPT6
		PGLS		SH3D19
		PGM2		SLC25A4
		PLCL1		SLK
		PLCL2		SNAP91
		PPP1R12A		SPAG9
		PPP1R12B		SRC
		PRDX2		STK25
		PRKAR1A		SURF4
		PRKCA		SYK
		PRKCB		TOMM70A
		PSMD2		TPM2
		PSME2		TRIM26
		PTPN11		TTN
		PTRH2		TUBAL3
		RAB2A		UGT1A7C
		RANBP1		WDSUB1
		RBM3
		RBPMS
		RDH11
		RPS23
		RPS26
		RPSA
		RPSA
		SBF1
		SEC23B
		SEC63
		SEPT7
		SERBP1
		SERPINB1B
		SERPINB9B
		SERPINB9C
		SERPINI2
		SESTD1
		SMTN
		SNX6
		SOD1
		SSR4
		SVIL
		SYNM
		TAGLN3
		TENC1
		TES
		TLN2
		TMEM214
		TNS1
		TNS3
		TOR1AIP2
		TPM1
		TUBB3
		TUBB5
		TUBB6
		USP14
		USP15
		VPS26A
		WARS
		ZYX

## Sheet: B 
Figure 5-source data 2B
Select proteins that interact with HNF4a in a1HMZ and a7HMZ colons from RIME analysis used to prepare the graph in Figure 5C.
a1HMZ and a7HMZ		a7HMZ unique		a1HMZ unique
Transcription Factors		Transcription Factors		Transcription Factors
DPF2		BTF3		ESRRA
HNF4A		FBLIM1
HNF4G		NPM1
IFI35
NRIP1
RNA binding proteins		RNA binding proteins		RNA binding proteins
DDX6		SERBP1		DDX1
ZC3H14		CPEB2
		CPEB3
		CPEB4
		IGF2BP2
		RBPMS
		PABPC4
		RBM3
Kinases		Kinases		Kinases
SPHK2		AAK1		AKT1
PRKACB		CAMK2B		DCLK1
		CDC42BPB		EMD
		CKM		NDRG2
		PRKCA		PRKAA1
		PRKCB		PRKAA2
		PRKAR1A		PRKCD
				ROCK2
Phosphatases		Phosphatases		RPS6KA2
		PTPN11		RPS6KA3
		TENC1		SRC
		TNS1		SYK
		TNS3		STK25
		PPP1R12A		SLK
		PPP1R12B		SPAG9
				Phosphatases
				PPM1E
				PPP2R2A
				PPP2R2B
				PPP2R2D

## Sheet: C 
Figure 5-source data 2C												0= not present in anti-HNF4a Ab (a445) or control IgG; 1= present in a445 but not IgG; -1 = present in IgG but not a445
All peptides that interact with HNF4a in both a7HMZ and a1HMZ colons from RIME analysis in which there are at least 2 positives for each genotype.
												Mouse 1	Mouse 2	Mouse 3	Mouse 1	Mouse 2	Mouse 3
Sym	Master	GeneID	FDR	Acc	Desc	PEP.Score	Coverage (%)	Num.Peptides	Num.PSMs	Qval	AAs	a7HMZ.G67.a445	a7HMZ.G70.a445	a7HMZ.G72.a445	a1HMZ.G63.a445	a1HMZ.G77.a445	a1HMZ.G78.a445	Area.a7HMZ.G67.a445	Area.a7HMZ.G67.a445.IgG	Area.a7HMZ.G70.a445	Area.a7HMZ.G70.a445.IgG	Area.a7HMZ.G72.a445	Area.a7HMZ.G72.a445.IgG	Area.a1HMZ.G63.a445	Area.a1HMZ.G63.a445.IgG	Area.a1HMZ.G77.a445	Area.a1HMZ.G77.a445.IgG	Area.a1HMZ.G78.a445	Area.a1HMZ.G78.a445.IgG	Mods	Pfam	emPAI	Score.Sequest.HT
Actr3	IsMasterProteinCandidate	74117	High	Q3TGW0	Putative uncharacterized protein OS=Mus musculus GN=Actr3 PE=2 SV=1	14.0993	6.69856	2	12	0	418	1	1	1	0	1	1	29000000	NA	37000000	NA	45000000	NA	27000000	30000000	20000000	NA	26000000	NA		Pf00022	0.585	25.6173
Actr3	IsMasterProteinCandidate	74117	High	Q3TWJ4	Putative uncharacterized protein OS=Mus musculus GN=Actr3 PE=2 SV=1	14.0993	6.69856	2	12	0	418	1	1	1	0	1	1	29000000	NA	37000000	NA	45000000	NA	27000000	30000000	20000000	NA	26000000	NA		Pf00022	0.585	25.6173
Actr3	IsMasterProtein	74117	High	Q3TGE1	Putative uncharacterized protein OS=Mus musculus GN=Actr3 PE=2 SV=1	14.0993	6.69856	2	12	0	418	1	1	1	0	1	1	29000000	NA	37000000	NA	45000000	NA	27000000	30000000	20000000	NA	26000000	NA		Pf00022	0.585	25.6173
Actr3	IsMasterProteinCandidate	74117	High	Q3ULF7	Actr3 protein OS=Mus musculus GN=Actr3 PE=2 SV=1	14.0993	6.69856	2	12	0	418	1	1	1	0	1	1	29000000	NA	37000000	NA	45000000	NA	27000000	30000000	20000000	NA	26000000	NA		Pf00022	0.585	25.6173
Ago2; Eif2c2	IsMasterProteinCandidate	239528	High	Q6PHA2	Eif2c2 protein (Fragment) OS=Mus musculus GN=Ago2 PE=2 SV=1	14.8965	10.5263	3	11	0	437	1	0	1	1	1	1	23000000	NA	NA	NA	7300000	NA	2600000	NA	42000000	NA	7100000	NA		Pf02171	0.492	17.6586
Ago2; Eif2c2	IsMasterProteinCandidate	239528	High	Q8R3Q7	Eif2c2 protein (Fragment) OS=Mus musculus GN=Ago2 PE=2 SV=2	14.8965	8.67925	3	11	0	530	1	0	1	1	1	1	23000000	NA	NA	NA	7300000	NA	2600000	NA	42000000	NA	7100000	NA		Pf02170, Pf02171	0.346	17.6586
Ago2; Eif2c2	IsMasterProteinCandidate	239528	High	Q6P239	Piwi-like protein (Fragment) OS=Mus musculus GN=Ago2 PE=2 SV=1	14.8965	7.41935	3	11	0	620	1	0	1	1	1	1	23000000	NA	NA	NA	7300000	NA	2600000	NA	42000000	NA	7100000	NA		Pf02170, Pf02171	0.311	17.6586
Ago2; Eif2c2	IsMasterProtein	239528	High	Q8CJG0	Protein argonaute-2 OS=Mus musculus GN=Ago2 PE=1 SV=3	14.8965	5.34884	3	11	0	860	1	0	1	1	1	1	23000000	NA	NA	NA	7300000	NA	2600000	NA	42000000	NA	7100000	NA		Pf02170, Pf02171, Pf08699	0.212	17.6586
Ago2; Eif2c2	None	239528	High	Q8CGT9	Argonaute 2 protein (Fragment) OS=Mus musculus GN=Ago2 PE=4 SV=1	11.3944	3.89262	2	8	0	745	1	0	1	1	1	1	6200000	NA	NA	NA	1900000	NA	2600000	NA	47000000	NA	7100000	NA		Pf02170, Pf02171, Pf08699	0.17	17.6586
Anp32a	IsMasterProteinCandidate	11737	High	D3Z7M9	Acidic leucine-rich nuclear phosphoprotein 32 family member A OS=Mus musculus GN=Anp32a PE=4 SV=1	10.2821	12.0172	2	11	0	233	0	1	1	1	1	1	94000000	35000000	39000000	NA	110000000	NA	53000000	NA	74000000	NA	91000000	NA		Pf12799, Pf13855, Pf14580	1.371	23.1004
Anp32a	IsMasterProtein	11737	High	O35381	Acidic leucine-rich nuclear phosphoprotein 32 family member A OS=Mus musculus GN=Anp32a PE=1 SV=1	10.2821	11.336	2	11	0	247	0	1	1	1	1	1	94000000	35000000	39000000	NA	110000000	NA	53000000	NA	74000000	NA	91000000	NA		Pf12799, Pf13855, Pf14580	0.995	23.1004
Arhgef1	IsMasterProteinCandidate	16801	High	Q61210	Rho guanine nucleotide exchange factor 1 OS=Mus musculus GN=Arhgef1 PE=1 SV=2	9.09158	3.47826	2	5	0	920	1	1	0	1	1	1	17000000	NA	13000000	NA	NA	NA	1600000	NA	20000000	NA	33000000	NA		Pf00621, Pf09128	0.125	8.76927
Arhgef1	IsMasterProteinCandidate	16801	High	Q6KAM6	MFLJ00369 protein (Fragment) OS=Mus musculus GN=Arhgef1 PE=2 SV=1	9.09158	3.40788	2	5	0	939	1	1	0	1	1	1	17000000	NA	13000000	NA	NA	NA	1600000	NA	20000000	NA	33000000	NA		Pf00621, Pf09128	0.125	8.76927
Arhgef1	IsMasterProtein	16801	High	E9PUF7	Rho guanine nucleotide exchange factor 1 OS=Mus musculus GN=Arhgef1 PE=1 SV=1	9.09158	3.27869	2	5	0	976	1	1	0	1	1	1	17000000	NA	13000000	NA	NA	NA	1600000	NA	20000000	NA	33000000	NA		Pf00621, Pf09128	0.116	8.76927
Arpc2	IsMasterProteinCandidate	76709	High	Q4FZG5	Arpc2 protein (Fragment) OS=Mus musculus GN=Arpc2 PE=2 SV=1	12.3962	16.3043	3	10	0	276	1	1	0	1	1	1	39000000	NA	31000000	NA	NA	NA	53000000	NA	26000000	NA	47000000	NA		Pf04045	0.468	26.0401
Arpc2	IsMasterProteinCandidate	76709	High	Q9CVB6	Actin-related protein 2/3 complex subunit 2 OS=Mus musculus GN=Arpc2 PE=1 SV=3	12.3962	15	3	10	0	300	1	1	0	1	1	1	39000000	NA	31000000	NA	NA	NA	53000000	NA	26000000	NA	47000000	NA		Pf04045	0.413	26.0401
Arpc2	IsMasterProtein	76709	High	Q3UA52	Putative uncharacterized protein (Fragment) OS=Mus musculus GN=Arpc2 PE=2 SV=1	12.3962	11.7493	3	10	0	383	1	1	0	1	1	1	39000000	NA	31000000	NA	NA	NA	53000000	NA	26000000	NA	47000000	NA		Pf04045	0.389	26.0401
Atl3	IsMasterProteinCandidate	109168	High	E9PYT3	Atlastin-3 OS=Mus musculus GN=Atl3 PE=4 SV=1	10.9469	5.22388	2	12	0	536	1	0	1	0	1	1	41000000	NA	NA	NA	39000000	NA	85000000	14000000	53000000	NA	63000000	NA		Pf02263	0.274	22.8916
Atl3	IsMasterProtein	109168	High	Q91YH5	Atlastin-3 OS=Mus musculus GN=Atl3 PE=2 SV=1	10.9469	5.1756	2	12	0	541	1	0	1	0	1	1	41000000	NA	NA	NA	39000000	NA	85000000	14000000	53000000	NA	63000000	NA		Pf02263	0.245	22.8916
Bag3	IsMasterProtein	29810	High	A6H663	BCL2-associated athanogene 3 OS=Mus musculus GN=Bag3 PE=2 SV=1	25.8666	11.6118	5	15	0	577	1	1	1	1	0	1	270000000	NA	47000000	NA	110000000	NA	210000000	NA	58000000	18000000	290000000	NA		Pf00397, Pf02179	0.509	20.2668
Bag3	IsMasterProteinCandidate	29810	High	Q9JLV1	BAG family molecular chaperone regulator 3 OS=Mus musculus GN=Bag3 PE=1 SV=2	25.8666	11.6118	5	15	0	577	1	1	1	1	0	1	270000000	NA	47000000	NA	110000000	NA	210000000	NA	58000000	18000000	290000000	NA		Pf00397, Pf02179	0.509	20.2668
C1qc	IsMasterProtein	12262	High	Q02105	Complement C1q subcomponent subunit C OS=Mus musculus GN=C1qc PE=2 SV=2	14.8982	8.53659	3	26	0	246	1	0	1	1	1	0	240000000	NA	NA	NA	1000000000	NA	6500000000	NA	3500000000	NA	NA	NA		Pf00229, Pf00386, Pf01391	2.162	18.2508
Capn2	IsMasterProteinCandidate	12334	High	Q3U3A8	Putative uncharacterized protein OS=Mus musculus GN=Capn2 PE=2 SV=1	13.3558	4.28571	2	14	0	700	1	1	1	0	1	1	11000000	NA	5300000	NA	2800000	NA	6600000	3000000	15000000	NA	22000000	NA		Pf00648, Pf01067, Pf13833	0.269	44.8006
Capn2	IsMasterProtein	12334	High	O08529	Calpain-2 catalytic subunit OS=Mus musculus GN=Capn2 PE=2 SV=4	13.3558	4.28571	2	14	0	700	1	1	1	0	1	1	11000000	NA	5300000	NA	2800000	NA	6600000	3000000	15000000	NA	22000000	NA		Pf00648, Pf01067, Pf13833	0.269	44.8006
Capn2	IsMasterProteinCandidate	12334	High	Q3U8S5	Putative uncharacterized protein OS=Mus musculus GN=Capn2 PE=2 SV=1	13.3558	4.28571	2	14	0	700	1	1	1	0	1	1	11000000	NA	5300000	NA	2800000	NA	6600000	3000000	15000000	NA	22000000	NA		Pf00648, Pf01067, Pf13833	0.269	44.8006
Cav1	IsMasterProteinCandidate	12389	High	H3BLK5	Caveolin, caveolae protein 1, isoform CRA_c OS=Mus musculus GN=Cav1 PE=4 SV=1	5.08186	10.0719	1	5	0.000200361	139	0	1	1	1	1	1	NA	NA	53000000	NA	48000000	NA	100000000	NA	84000000	NA	95000000	NA		Pf01146	0.259	11.0408
Cav1	IsMasterProtein	12389	High	P49817	Caveolin-1 OS=Mus musculus GN=Cav1 PE=1 SV=1	5.08186	7.86517	1	5	0.000200361	178	0	1	1	1	1	1	NA	NA	53000000	NA	48000000	NA	100000000	NA	84000000	NA	95000000	NA		Pf01146	0.292	11.0408
Cav3	IsMasterProtein	12391	High	P51637	Caveolin-3 OS=Mus musculus GN=Cav3 PE=1 SV=1	4.84741	7.94702	1	4	0.000200361	151	1	1	0	0	1	1	18000000	NA	17000000	NA	NA	NA	NA	NA	34000000	NA	83000000	NA		Pf01146	0.585	10.5345
Chmp1a	IsMasterProtein	234852	High	Q921W0	Charged multivesicular body protein 1a OS=Mus musculus GN=Chmp1a PE=1 SV=1	3.93144	4.59184	1	5	0.00054338	196	1	1	1	1	0	1	4400000	NA	6600000	NA	1500000	NA	3000000	NA	NA	NA	4800000	NA		Pf03357	0.259	12.9765
Clic1	IsMasterProtein	114584	High	Q3TIP8	Putative uncharacterized protein OS=Mus musculus GN=Clic1 PE=2 SV=1	6.81759	7.46888	1	5	0	241	1	0	1	1	1	1	52000000	NA	NA	NA	54000000	NA	63000000	NA	49000000	NA	78000000	NA		Pf00043, Pf13409, Pf13410, Pf13417	0.155	11.3934
Clic1	IsMasterProteinCandidate	114584	High	Q9Z1Q5	Chloride intracellular channel protein 1 OS=Mus musculus GN=Clic1 PE=1 SV=3	6.81759	7.46888	1	5	0	241	1	0	1	1	1	1	52000000	NA	NA	NA	54000000	NA	63000000	NA	49000000	NA	78000000	NA		Pf00043, Pf13409, Pf13410, Pf13417	0.179	11.3934
Cpne2	None	234577	High	Q8QZU9	Cpne2 protein OS=Mus musculus GN=Cpne2 PE=2 SV=1	3.63658	2.51397	1	5	0.00054338	358	1	0	1	1	1	1	42000000	NA	NA	NA	19000000	NA	36000000	NA	39000000	NA	40000000	NA		Pf00168, Pf07002, Pf10138	0.292	0
Cpne2	None	234577	High	P59108	Copine-2 OS=Mus musculus GN=Cpne2 PE=2 SV=1	3.63658	1.64234	1	5	0.00054338	548	1	0	1	1	1	1	42000000	NA	NA	NA	19000000	NA	36000000	NA	39000000	NA	40000000	NA		Pf00168, Pf07002, Pf10138	0.122	0
Cpne2	None	234577	High	Q3TVB2	Putative uncharacterized protein OS=Mus musculus GN=Cpne2 PE=2 SV=1	3.63658	1.64234	1	5	0.00054338	548	1	0	1	1	1	1	42000000	NA	NA	NA	19000000	NA	36000000	NA	39000000	NA	40000000	NA		Pf00168, Pf07002, Pf10138	0.136	0
Cpne4	None	74020	High	Q9D6C8	Copine-4 OS=Mus musculus GN=Cpne4 PE=2 SV=1	3.63658	1.89474	1	5	0.00054338	475	1	0	1	1	1	1	42000000	NA	NA	NA	19000000	NA	36000000	NA	39000000	NA	40000000	NA		Pf00092, Pf00168, Pf04441, Pf07002, Pf10138	0.122	0
Cpne4	None	74020	High	Q8BLR2	Copine-4 OS=Mus musculus GN=Cpne4 PE=1 SV=1	3.63658	1.6158	1	5	0.00054338	557	1	0	1	1	1	1	42000000	NA	NA	NA	19000000	NA	36000000	NA	39000000	NA	40000000	NA		Pf00092, Pf00168, Pf04441, Pf07002, Pf10138	0.101	0
Cpne5	None	240058	High	Q8JZW4	Copine-5 OS=Mus musculus GN=Cpne5 PE=2 SV=1	3.63658	1.51771	1	5	0.00054338	593	1	0	1	1	1	1	42000000	NA	NA	NA	19000000	NA	36000000	NA	39000000	NA	40000000	NA		Pf00168, Pf07002, Pf10138	0.105	0
Cpne6	None	12891	High	Q3UYN2	Copine-6 OS=Mus musculus GN=Cpne6 PE=2 SV=1	3.63658	1.61871	1	5	0.00054338	556	1	0	1	1	1	1	42000000	NA	NA	NA	19000000	NA	36000000	NA	39000000	NA	40000000	NA		Pf00092, Pf00168, Pf07002, Pf10138	0.11	0
Cpne6	None	12891	High	Q9Z140	Copine-6 OS=Mus musculus GN=Cpne6 PE=2 SV=1	3.63658	1.6158	1	5	0.00054338	557	1	0	1	1	1	1	42000000	NA	NA	NA	19000000	NA	36000000	NA	39000000	NA	40000000	NA		Pf00092, Pf00168, Pf07002, Pf10138	0.105	0
Cpne7	None	102278	High	Q8BIJ1	Putative uncharacterized protein OS=Mus musculus GN=Cpne7 PE=2 SV=1	3.63658	2.60116	1	5	0.00054338	346	1	0	1	1	1	1	42000000	NA	NA	NA	19000000	NA	36000000	NA	39000000	NA	40000000	NA		Pf00092, Pf07002, Pf10138	0.212	0
Cpne7	None	102278	High	Q0VE82	Copine-7 OS=Mus musculus GN=Cpne7 PE=2 SV=1	3.63658	1.6158	1	5	0.00054338	557	1	0	1	1	1	1	42000000	NA	NA	NA	19000000	NA	36000000	NA	39000000	NA	40000000	NA		Pf00092, Pf00168, Pf07002, Pf10138	0.11	0
Cpne8	None	66871	High	Q05D94	Cpne8 protein OS=Mus musculus GN=Cpne8 PE=2 SV=1	3.63658	2.04545	1	5	0.00054338	440	1	0	1	1	1	1	42000000	NA	NA	NA	19000000	NA	36000000	NA	39000000	NA	40000000	NA		Pf00168, Pf07002, Pf10138	0.136	0
Cpne8	None	66871	High	Q9DC53	Copine-8 OS=Mus musculus GN=Cpne8 PE=2 SV=3	3.63658	1.55979	1	5	0.00054338	577	1	0	1	1	1	1	42000000	NA	NA	NA	19000000	NA	36000000	NA	39000000	NA	40000000	NA		Pf00168, Pf07002, Pf10138	0.096	0
Cpne9	None	211232	High	Q5DTH0	MKIAA4217 protein (Fragment) OS=Mus musculus GN=Cpne9 PE=2 SV=1	3.63658	2.90323	1	5	0.00054338	310	1	0	1	1	1	1	42000000	NA	NA	NA	19000000	NA	36000000	NA	39000000	NA	40000000	NA		Pf07002, Pf10138	0.334	0
Cpne9	None	211232	High	Q8BRJ6	Putative uncharacterized protein OS=Mus musculus GN=Cpne9 PE=2 SV=1	3.63658	1.68224	1	5	0.00054338	535	1	0	1	1	1	1	42000000	NA	NA	NA	19000000	NA	36000000	NA	39000000	NA	40000000	NA		Pf00168, Pf07002, Pf10138	0.105	0
Cpne9	None	211232	High	Q1RLL3	Copine-9 OS=Mus musculus GN=Cpne9 PE=2 SV=1	3.63658	1.62749	1	5	0.00054338	553	1	0	1	1	1	1	42000000	NA	NA	NA	19000000	NA	36000000	NA	39000000	NA	40000000	NA		Pf00168, Pf07002, Pf10138	0.093	0
Cul1	None	26965	High	Q3TPM3	Cullin-1 (Fragment) OS=Mus musculus GN=Cul1 PE=2 SV=1	6.71499	1.71674	1	8	0	699	1	1	1	1	1	0	10000000	NA	4200000	NA	11000000	NA	28000000	NA	28000000	NA	32000000	9200000		Pf00888	0.058	18.9709
Cul1	None	26965	High	Q05DR6	Cul1 protein (Fragment) OS=Mus musculus GN=Cul1 PE=2 SV=1	6.71499	1.70213	1	8	0	705	1	1	1	1	1	0	10000000	NA	4200000	NA	11000000	NA	28000000	NA	28000000	NA	32000000	9200000		Pf00888	0.058	18.9709
Ddx6	IsMasterProtein	13209	High	P54823	Probable ATP-dependent RNA helicase DDX6 OS=Mus musculus GN=Ddx6 PE=1 SV=1	9.33455	7.66046	2	7	0	483	1	1	0	0	1	1	24000000	NA	18000000	NA	NA	NA	34000000	9600000	NA	NA	51000000	NA		Pf00270, Pf00271, Pf14617	0.212	20.4683
Dmd	IsMasterProtein	13405	High	P11531	Dystrophin OS=Mus musculus GN=Dmd PE=1 SV=3	30.132	2.50136	8	26	0	3678	1	0	1	1	0	1	15000000	NA	19000000	11000000	6700000	NA	8000000	NA	17000000	11000000	59000000	NA		Pf00307, Pf00397, Pf00435, Pf00569, Pf02463, Pf09068, Pf09069, Pf11971	0.065	37.9355
Dnajb4	IsMasterProtein	67035	High	Q9D832	DnaJ homolog subfamily B member 4 OS=Mus musculus GN=Dnajb4 PE=2 SV=1	18.3974	16.3205	5	17	0	337	1	1	1	1	0	1	150000000	NA	53000000	NA	170000000	NA	130000000	NA	150000000	34000000	190000000	NA		Pf00226, Pf01556	0.778	13.9832
Dnajb5	IsMasterProteinCandidate	56323	High	O89114	DnaJ homolog subfamily B member 5 OS=Mus musculus GN=Dnajb5 PE=2 SV=1	7.06038	5.17241	1	15	0	348	1	1	1	1	1	1	48000000	NA	17000000	NA	20000000	NA	63000000	NA	58000000	NA	35000000	NA		Pf00226, Pf01556	0.129	39.2064
Dnajb5	IsMasterProteinCandidate	56323	High	Q3TYL4	Putative uncharacterized protein OS=Mus musculus GN=Dnajb5 PE=2 SV=1	7.06038	5.17241	1	15	0	348	1	1	1	1	1	1	48000000	NA	17000000	NA	20000000	NA	63000000	NA	58000000	NA	35000000	NA		Pf00226, Pf01556	0.129	39.2064
Dnajb5	IsMasterProtein	56323	High	A2AG30	DnaJ (Hsp40) homolog, subfamily B, member 5, isoform CRA_a OS=Mus musculus GN=Dnajb5 PE=4 SV=1	7.06038	4.71204	1	15	0	382	1	1	1	1	1	1	48000000	NA	17000000	NA	20000000	NA	63000000	NA	58000000	NA	35000000	NA		Pf00226, Pf01556	0.11	39.2064
Dpf2	IsMasterProteinCandidate	19708	High	Q3UKV4	Putative uncharacterized protein OS=Mus musculus GN=Dpf2 PE=2 SV=1	6.29243	4.09207	1	5	0.000200361	391	1	0	1	1	1	1	16000000	NA	NA	NA	15000000	NA	23000000	NA	25000000	NA	15000000	NA		Pf00628, Pf14051	0.136	11.4756
Dpf2	IsMasterProteinCandidate	19708	High	Q61103	Zinc finger protein ubi-d4 OS=Mus musculus GN=Dpf2 PE=1 SV=1	6.29243	4.09207	1	5	0.000200361	391	1	0	1	1	1	1	16000000	NA	NA	NA	15000000	NA	23000000	NA	25000000	NA	15000000	NA		Pf00628, Pf14051	0.136	11.4756
Dpf2	IsMasterProtein	19708	High	D3Z5N6	Zinc finger protein ubi-d4 OS=Mus musculus GN=Dpf2 PE=1 SV=1	6.29243	3.95062	1	5	0.000200361	405	1	0	1	1	1	1	16000000	NA	NA	NA	15000000	NA	23000000	NA	25000000	NA	15000000	NA		Pf00628, Pf14051	0.136	11.4756
Dst	None	13518	High	Q91ZU6	Dystonin OS=Mus musculus GN=Dst PE=1 SV=2	5.99225	0.189368	1	5	0.000200361	7393	1	1	1	1	0	1	7700000	NA	2500000	NA	7400000	NA	9100000	NA	NA	NA	21000000	NA		Pf00036, Pf00307, Pf00435, Pf00681, Pf02187, Pf02463, Pf06008, Pf11971, Pf12128, Pf13499, Pf13514, Pf13833	0.006	12.9174
Dst	None	13518	High	S4R1P5	Dystonin OS=Mus musculus GN=Dst PE=1 SV=1	5.99225	0.181418	1	5	0.000200361	7717	1	1	1	1	0	1	7700000	NA	2500000	NA	7400000	NA	9100000	NA	NA	NA	21000000	NA		Pf00036, Pf00307, Pf00435, Pf00681, Pf02187, Pf06008, Pf11971, Pf12128, Pf13499, Pf13514, Pf13833	0.006	12.9174
Dynll2	IsMasterProtein	68097	High	Q9D0M5	Dynein light chain 2, cytoplasmic OS=Mus musculus GN=Dynll2 PE=1 SV=1	9.7543	13.4831	1	11	0	89	0	1	1	1	1	1	24000000	9500000	18000000	NA	9200000	NA	52000000	NA	53000000	NA	69000000	NA		Pf01221	2.162	21.9415
Eif4g2	None	13690	High	G3XA17	Eukaryotic translation initiation factor 4 gamma 2 OS=Mus musculus GN=Eif4g2 PE=4 SV=1	4.84037	2.86976	2	10	0.000200361	906	1	0	1	1	1	1	29000000	NA	NA	NA	34000000	NA	31000000	NA	40000000	NA	50000000	NA		Pf02020, Pf02847, Pf02854	0.105	9.01064
Eml4	None	78798	High	A7ISP9	EMAP-like protein 4 OS=Mus musculus GN=Eml4 PE=2 SV=1	5.98625	1.02354	1	16	0.000200361	977	1	0	1	0	1	1	18000000	NA	NA	NA	1600000	NA	56000000	2700000	61000000	NA	56000000	NA		Pf00400, Pf03451	0.113	18.1797
Eml4	None	78798	High	F8WJ93	Echinoderm microtubule-associated protein-like 4 OS=Mus musculus GN=Eml4 PE=1 SV=1	5.98625	1.01215	1	16	0.000200361	988	1	0	1	0	1	1	18000000	NA	NA	NA	1600000	NA	56000000	2700000	61000000	NA	56000000	NA		Pf00400, Pf03451	0.11	18.1797
Eml4	None	78798	High	Q3UMY5	Echinoderm microtubule-associated protein-like 4 OS=Mus musculus GN=Eml4 PE=1 SV=1	5.98625	1.01215	1	16	0.000200361	988	1	0	1	0	1	1	18000000	NA	NA	NA	1600000	NA	56000000	2700000	61000000	NA	56000000	NA		Pf00400, Pf03451	0.105	18.1797
Eps15	IsMasterProteinCandidate	13858	High	Q5JC28	Epidermal growth factor receptor pathway substrate 15 isoform B OS=Mus musculus GN=Eps15 PE=2 SV=1	3.046	1.76545	1	13	0.00612786	793	1	0	1	1	1	1	2100000000	NA	NA	NA	1800000000	NA	5000000000	NA	4300000000	NA	3100000000	NA		Pf12763	0.08	24.5904
Eps15	IsMasterProteinCandidate	13858	High	P42567	Epidermal growth factor receptor substrate 15 OS=Mus musculus GN=Eps15 PE=1 SV=1	3.046	1.56076	1	13	0.00612786	897	1	0	1	1	1	1	2100000000	NA	NA	NA	1800000000	NA	5000000000	NA	4300000000	NA	3100000000	NA		Pf12763	0.068	24.5904
Eps15	IsMasterProtein	13858	High	H3BK65	Epidermal growth factor receptor substrate 15 OS=Mus musculus GN=Eps15 PE=1 SV=1	3.046	1.50054	1	13	0.00612786	933	1	0	1	1	1	1	2100000000	NA	NA	NA	1800000000	NA	5000000000	NA	4300000000	NA	3100000000	NA		Pf12763	0.062	24.5904
Etf1	IsMasterProteinCandidate	225363	High	Q3U6V5	Putative uncharacterized protein OS=Mus musculus GN=Etf1 PE=2 SV=1	4.47925	3.35917	1	6	0.000200361	387	1	0	1	1	1	0	11000000	NA	NA	NA	9100000	NA	12000000	NA	12000000	NA	16000000	3700000		Pf01248, Pf03463, Pf03464, Pf03465	0.145	11.5195
Etf1	IsMasterProtein	225363	High	Q3TDF8	Putative uncharacterized protein OS=Mus musculus GN=Etf1 PE=2 SV=1	4.47925	2.97483	1	6	0.000200361	437	1	0	1	1	1	0	11000000	NA	NA	NA	9100000	NA	12000000	NA	12000000	NA	16000000	3700000		Pf03463, Pf03464, Pf03465	0.116	11.5195
Etf1	IsMasterProteinCandidate	225363	High	Q3TL10	Putative uncharacterized protein OS=Mus musculus GN=Etf1 PE=2 SV=1	4.47925	2.97483	1	6	0.000200361	437	1	0	1	1	1	0	11000000	NA	NA	NA	9100000	NA	12000000	NA	12000000	NA	16000000	3700000		Pf03463, Pf03464, Pf03465	0.116	11.5195
Etf1	IsMasterProteinCandidate	225363	High	Q3TF02	Putative uncharacterized protein OS=Mus musculus GN=Etf1 PE=2 SV=1	4.47925	2.97483	1	6	0.000200361	437	1	0	1	1	1	0	11000000	NA	NA	NA	9100000	NA	12000000	NA	12000000	NA	16000000	3700000		Pf03463, Pf03464, Pf03465	0.116	11.5195
Etf1	IsMasterProteinCandidate	225363	High	Q8BWY3	Eukaryotic peptide chain release factor subunit 1 OS=Mus musculus GN=Etf1 PE=1 SV=4	4.47925	2.97483	1	6	0.000200361	437	1	0	1	1	1	0	11000000	NA	NA	NA	9100000	NA	12000000	NA	12000000	NA	16000000	3700000		Pf03463, Pf03464, Pf03465	0.116	11.5195
Fam98a	IsMasterProteinCandidate	72722	High	Q8BL36	Putative uncharacterized protein OS=Mus musculus GN=Fam98a PE=2 SV=1	3.10585	3.24675	1	5	0.00612786	308	1	0	1	1	1	1	16000000	NA	NA	NA	3600000	NA	13000000	NA	21000000	NA	16000000	NA		Pf10239	0.233	0
Fam98a	IsMasterProtein	72722	High	Q3TJZ6	Protein FAM98A OS=Mus musculus GN=Fam98a PE=2 SV=1	3.10585	1.94175	1	5	0.00612786	515	1	0	1	1	1	1	16000000	NA	NA	NA	3600000	NA	13000000	NA	21000000	NA	16000000	NA		Pf10239	0.136	0
Gbe1	IsMasterProteinCandidate	74185	High	G3UW30	1,4-alpha-glucan-branching enzyme OS=Mus musculus GN=Gbe1 PE=4 SV=1	8.21313	1.9697	1	7	0	660	1	1	0	1	1	1	7200000	NA	2700000	NA	NA	NA	3500000	NA	4500000	NA	3200000	NA		Pf00128, Pf02806, Pf02922	0.16	19.618
Gbe1	IsMasterProteinCandidate	74185	High	Q8C7E6	Putative uncharacterized protein OS=Mus musculus PE=2 SV=1	8.21313	1.9697	1	7	0	660	1	1	0	1	1	1	7200000	NA	2700000	NA	NA	NA	3500000	NA	4500000	NA	3200000	NA		Pf00128, Pf02806, Pf02922	0.155	19.618
Gbe1	IsMasterProteinCandidate	74185	High	Q9D6Y9	1,4-alpha-glucan-branching enzyme OS=Mus musculus GN=Gbe1 PE=2 SV=1	8.21313	1.85185	1	7	0	702	1	1	0	1	1	1	7200000	NA	2700000	NA	NA	NA	3500000	NA	4500000	NA	3200000	NA		Pf00128, Pf02806, Pf02922	0.155	19.618
Gmppa	IsMasterProteinCandidate	69080	High	Q922H4	Mannose-1-phosphate guanyltransferase alpha OS=Mus musculus GN=Gmppa PE=2 SV=1	30.6935	13.0952	5	28	0	420	1	1	1	1	1	1	260000000	NA	18000000	NA	370000000	NA	130000000	NA	200000000	NA	110000000	NA		Pf00132, Pf00483, Pf12804	1.894	47.489
Gmppa	IsMasterProtein	69080	High	Q3UNC0	Putative uncharacterized protein (Fragment) OS=Mus musculus GN=Gmppa PE=2 SV=1	30.6935	12.9108	5	28	0	426	1	1	1	1	1	1	260000000	NA	18000000	NA	370000000	NA	130000000	NA	200000000	NA	110000000	NA		Pf00132, Pf00483, Pf12804	1.894	47.489
Gspt1	IsMasterProteinCandidate	14852	High	Q8BPH0	Putative uncharacterized protein (Fragment) OS=Mus musculus GN=Gspt1 PE=2 SV=1	14.6982	6.12245	2	8	0	441	1	1	1	1	1	1	4400000	NA	9300000	NA	19000000	NA	3900000	NA	5500000	NA	6700000	NA		Pf00009, Pf03143, Pf03144	0.35	19.2211
Gspt1	IsMasterProteinCandidate	14852	High	Q8CCV1	Putative uncharacterized protein OS=Mus musculus GN=Gspt1 PE=2 SV=1	14.6982	5.42169	2	8	0	498	1	1	1	1	1	1	4400000	NA	9300000	NA	19000000	NA	3900000	NA	5500000	NA	6700000	NA		Pf00009, Pf03143, Pf03144	0.35	19.2211
Gspt1	IsMasterProtein	14852	High	Q8R050	Eukaryotic peptide chain release factor GTP-binding subunit ERF3A OS=Mus musculus GN=Gspt1 PE=1 SV=2	14.6982	4.24528	2	8	0	636	1	1	1	1	1	1	4400000	NA	9300000	NA	19000000	NA	3900000	NA	5500000	NA	6700000	NA		Pf00009, Pf03143, Pf03144, Pf07145	0.334	19.2211
Gspt2	IsMasterProteinCandidate	14853	High	Q149F3	Eukaryotic peptide chain release factor GTP-binding subunit ERF3B OS=Mus musculus GN=Gspt2 PE=1 SV=1	14.6982	4.27215	2	8	0	632	1	1	1	1	1	1	4400000	NA	9300000	NA	19000000	NA	3900000	NA	5500000	NA	6700000	NA		Pf00009, Pf03143, Pf03144, Pf07145	0.318	19.2211
Gucy1b3	IsMasterProteinCandidate	54195	High	Q3UTI4	Putative uncharacterized protein (Fragment) OS=Mus musculus GN=Gucy1b3 PE=2 SV=1	7.01903	4.45545	2	10	0	606	1	1	1	1	1	1	2100000	NA	2400000	NA	1500000	NA	1400000	NA	3900000	NA	6600000	NA		Pf00211, Pf07700, Pf07701	0.129	25.8309
Gucy1b3	IsMasterProteinCandidate	54195	High	Q80YP4	Guanylate cyclase soluble subunit beta-1 OS=Mus musculus GN=Gucy1b3 PE=2 SV=1	7.01903	4.4335	2	10	0	609	1	1	1	1	1	1	2100000	NA	2400000	NA	1500000	NA	1400000	NA	3900000	NA	6600000	NA		Pf00211, Pf07700, Pf07701	0.136	25.8309
Gucy1b3	IsMasterProtein	54195	High	O54865	Guanylate cyclase soluble subunit beta-1 OS=Mus musculus GN=Gucy1b3 PE=2 SV=1	7.01903	4.35484	2	10	0	620	1	1	1	1	1	1	2100000	NA	2400000	NA	1500000	NA	1400000	NA	3900000	NA	6600000	NA		Pf00211, Pf07700, Pf07701	0.125	25.8309
Hnf4a	IsMasterProteinCandidate	15378	High	A2ICG8	Hepatocyte nuclear factor 4 alpha 9 (Fragment) OS=Mus musculus GN=Hnf4a PE=2 SV=1	51.4322	14.5714	5	169	0	350	1	1	1	1	1	1	850000000	NA	460000000	NA	1100000000	NA	1100000000	NA	1200000000	NA	860000000	NA		Pf00104, Pf00105, Pf03408	3.394	322.98
Hnf4a	IsMasterProteinCandidate	15378	High	B9VVT7	HNF4alpha12 OS=Mus musculus GN=Hnf4a PE=2 SV=1	51.4322	14.4476	5	169	0	353	1	1	1	1	1	1	850000000	NA	460000000	NA	1100000000	NA	1100000000	NA	1200000000	NA	860000000	NA		Pf00104, Pf00105, Pf03408	3.394	322.98
Hnf4a	IsMasterProteinCandidate	15378	High	B9VVT5	HNF4alpha10 (Fragment) OS=Mus musculus GN=Hnf4a PE=2 SV=1	51.4322	12.6551	5	169	0	403	1	1	1	1	1	1	850000000	NA	460000000	NA	1100000000	NA	1100000000	NA	1200000000	NA	860000000	NA		Pf00104, Pf00105, Pf03408	3.924	322.98
Hnf4a	IsMasterProteinCandidate	15378	High	B9VVT6	HNF4alpha11 (Fragment) OS=Mus musculus GN=Hnf4a PE=2 SV=1	51.4322	12.3487	5	169	0	413	1	1	1	1	1	1	850000000	NA	460000000	NA	1100000000	NA	1100000000	NA	1200000000	NA	860000000	NA		Pf00104, Pf00105, Pf03408	3.394	322.98
Hnf4a	IsMasterProteinCandidate	15378	High	Z4YKX0	Hepatic nuclear factor 4, alpha, isoform CRA_b OS=Mus musculus GN=Hnf4a PE=3 SV=1	51.4322	10.9677	5	169	0	465	1	1	1	1	1	1	850000000	NA	460000000	NA	1100000000	NA	1100000000	NA	1200000000	NA	860000000	NA		Pf00104, Pf00105	3.924	322.98
Hnf4a	IsMasterProtein	15378	High	P49698	Hepatocyte nuclear factor 4-alpha OS=Mus musculus GN=Hnf4a PE=1 SV=2	51.4322	10.7595	5	169	0	474	1	1	1	1	1	1	850000000	NA	460000000	NA	1100000000	NA	1100000000	NA	1200000000	NA	860000000	NA		Pf00104, Pf00105	3.924	322.98
Hnf4g	IsMasterProteinCandidate	30942	High	Q9WUU6	Hepatocyte nuclear factor 4-gamma OS=Mus musculus GN=Hnf4g PE=2 SV=2	45.8016	9.80392	4	121	0	408	1	0	1	1	1	0	76000000	NA	NA	NA	150000000	NA	44000000	NA	49000000	NA	NA	NA		Pf00104, Pf00105, Pf03408	2.162	282.503
Hnf4g	IsMasterProteinCandidate	30942	High	Q3UP48	Putative uncharacterized protein OS=Mus musculus GN=Hnf4g PE=2 SV=1	45.8016	9.56938	4	121	0	418	1	0	1	1	1	0	76000000	NA	NA	NA	150000000	NA	44000000	NA	49000000	NA	NA	NA		Pf00104, Pf00105, Pf03408	2.415	282.503
Hnf4g	IsMasterProteinCandidate	30942	High	Q059V1	Hepatocyte nuclear factor 4, gamma OS=Mus musculus GN=Hnf4g PE=2 SV=1	45.8016	9.56938	4	121	0	418	1	0	1	1	1	0	76000000	NA	NA	NA	150000000	NA	44000000	NA	49000000	NA	NA	NA		Pf00104, Pf00105, Pf03408	2.415	282.503
Hnf4g	IsMasterProtein	30942	High	E9QPS1	Hepatocyte nuclear factor 4-gamma OS=Mus musculus GN=Hnf4g PE=3 SV=1	45.8016	8.65801	4	121	0	462	1	0	1	1	1	0	76000000	NA	NA	NA	150000000	NA	44000000	NA	49000000	NA	NA	NA		Pf00104, Pf00105, Pf03408	2.162	282.503
Ifi35	IsMasterProtein	70110	High	Q9D8C4	Interferon-induced 35 kDa protein homolog OS=Mus musculus GN=Ifi35 PE=2 SV=3	4.33273	5.59441	1	5	0.000389257	286	1	1	0	1	1	1	5000000	NA	4300000	NA	NA	NA	1400000	NA	2700000	NA	5500000	NA		Pf07292, Pf07334	0.212	12.2935
Inpp1	IsMasterProtein	16329	High	P49442	Inositol polyphosphate 1-phosphatase OS=Mus musculus GN=Inpp1 PE=1 SV=2	4.26761	3.0303	1	8	0.000389257	396	0	1	1	1	1	1	13000000	2800000	6500000	NA	2600000	NA	6600000	NA	8000000	NA	10000000	NA		Pf00459	0.136	16.4726
Inpp4a	IsMasterProteinCandidate	269180	High	Q3UEQ1	Type I inositol 3,4-bisphosphate 4-phosphatase OS=Mus musculus GN=Inpp4a PE=2 SV=1	9.80581	3.25843	2	9	0	890	1	1	1	1	0	1	21000000	NA	10000000	NA	5100000	NA	26000000	NA	37000000	5400000	36000000	NA		Pf00168	0.136	11.0956
Inpp4a	IsMasterProteinCandidate	269180	High	E9Q9A0	Type I inositol 3,4-bisphosphate 4-phosphatase OS=Mus musculus GN=Inpp4a PE=4 SV=2	9.80581	3.09168	2	9	0	938	1	1	1	1	0	1	21000000	NA	10000000	NA	5100000	NA	26000000	NA	37000000	5400000	36000000	NA		Pf00168	0.129	11.0956
Inpp4a	IsMasterProteinCandidate	269180	High	F6V2U0	Type I inositol 3,4-bisphosphate 4-phosphatase OS=Mus musculus GN=Inpp4a PE=4 SV=1	9.80581	3.08839	2	9	0	939	1	1	1	1	0	1	21000000	NA	10000000	NA	5100000	NA	26000000	NA	37000000	5400000	36000000	NA		Pf00168	0.129	11.0956
Inpp4a	IsMasterProteinCandidate	269180	High	D3YUD3	Type I inositol 3,4-bisphosphate 4-phosphatase OS=Mus musculus GN=Inpp4a PE=4 SV=2	9.80581	3.03983	2	9	0	954	1	1	1	1	0	1	21000000	NA	10000000	NA	5100000	NA	26000000	NA	37000000	5400000	36000000	NA		Pf00168	0.129	11.0956
Inpp4a	IsMasterProteinCandidate	269180	High	D3YUL8	Type I inositol 3,4-bisphosphate 4-phosphatase OS=Mus musculus GN=Inpp4a PE=4 SV=1	9.80581	2.98354	2	9	0	972	1	1	1	1	0	1	21000000	NA	10000000	NA	5100000	NA	26000000	NA	37000000	5400000	36000000	NA		Pf00168	0.129	11.0956
Inpp4a	IsMasterProtein	269180	High	D3Z230	Type I inositol 3,4-bisphosphate 4-phosphatase OS=Mus musculus GN=Inpp4a PE=4 SV=1	9.80581	2.96827	2	9	0	977	1	1	1	1	0	1	21000000	NA	10000000	NA	5100000	NA	26000000	NA	37000000	5400000	36000000	NA		Pf00168	0.129	11.0956
Itih3	IsMasterProtein	16426	High	Q61704	Inter-alpha-trypsin inhibitor heavy chain H3 OS=Mus musculus GN=Itih3 PE=1 SV=3	13.3506	3.14961	3	18	0	889	1	1	1	1	1	1	4900000	NA	5400000	NA	9800000	NA	21000000	NA	10000000	NA	6800000	NA		Pf00092, Pf06668, Pf08487, Pf11443, Pf13519, Pf13768	0.269	34.7545
Ldhb	None	16832	High	Q5M8R7	Ldhb protein OS=Mus musculus GN=Ldhb PE=2 SV=1	4.36221	14.8515	1	6	0.000389257	101	1	1	1	0	1	1	13000000	NA	12000000	NA	2600000	NA	NA	NA	7000000	NA	9900000	NA		Pf02866	0.585	15.6492
Lrba	IsMasterProteinCandidate	80877	High	A0A0A6YXX3	Lipopolysaccharide-responsive and beige-like anchor protein OS=Mus musculus GN=Lrba PE=4 SV=1	5.49322	0.543267	1	7	0.000200361	2577	1	1	1	0	1	1	9300000	NA	6200000	NA	10000000	NA	15000000	6300000	8300000	NA	19000000	NA		Pf02138, Pf06469, Pf13385, Pf14844	0.023	15.2034
Lrba	IsMasterProteinCandidate	80877	High	A0A0A6YXL6	Lipopolysaccharide-responsive and beige-like anchor protein OS=Mus musculus GN=Lrba PE=4 SV=1	5.49322	0.501792	1	7	0.000200361	2790	1	1	1	0	1	1	9300000	NA	6200000	NA	10000000	NA	15000000	6300000	8300000	NA	19000000	NA		Pf02138, Pf06469, Pf13385, Pf14844	0.021	15.2034
Lrba	IsMasterProteinCandidate	80877	High	E9Q3Y4	Lipopolysaccharide-responsive and beige-like anchor protein OS=Mus musculus GN=Lrba PE=1 SV=1	5.49322	0.49054	1	7	0.000200361	2854	1	1	1	0	1	1	9300000	NA	6200000	NA	10000000	NA	15000000	6300000	8300000	NA	19000000	NA		Pf02138, Pf06469, Pf12719, Pf13385, Pf14844	0.02	15.2034
Lrba	IsMasterProtein	80877	High	Q9ESE1	Lipopolysaccharide-responsive and beige-like anchor protein OS=Mus musculus GN=Lrba PE=1 SV=1	5.49322	0.490196	1	7	0.000200361	2856	1	1	1	0	1	1	9300000	NA	6200000	NA	10000000	NA	15000000	6300000	8300000	NA	19000000	NA		Pf02138, Pf06469, Pf12719, Pf13385, Pf14844	0.019	15.2034
Macf1	None	11426	High	B1ARU1	Microtubule-actin cross-linking factor 1 OS=Mus musculus GN=Macf1 PE=1 SV=1	8.71487	0.373198	2	9	0	5895	1	1	1	1	0	1	7700000	NA	2500000	NA	7400000	NA	9100000	NA	NA	NA	21000000	NA		Pf00036, Pf00435, Pf00681, Pf02187, Pf02463, Pf03938, Pf13499, Pf13514, Pf13833	0.015	12.9174
Macf1	None	11426	High	Q9CYG3	Putative uncharacterized protein OS=Mus musculus GN=Macf1 PE=2 SV=1	5.99225	3.56234	1	5	0.000200361	393	1	1	1	1	0	1	7700000	NA	2500000	NA	7400000	NA	9100000	NA	NA	NA	21000000	NA		Pf00036, Pf02187, Pf13202, Pf13405, Pf13499, Pf13833	0.11	12.9174
Macf1	None	11426	High	Q4QQN2	Macf1 protein (Fragment) OS=Mus musculus GN=Macf1 PE=2 SV=1	5.99225	3.07692	1	5	0.000200361	455	1	1	1	1	0	1	7700000	NA	2500000	NA	7400000	NA	9100000	NA	NA	NA	21000000	NA		Pf00036, Pf02187, Pf13202, Pf13405, Pf13499, Pf13833	0.093	12.9174
Macf1	None	11426	High	Q80ZZ3	Macf1 protein (Fragment) OS=Mus musculus GN=Macf1 PE=2 SV=1	5.99225	2.58303	1	5	0.000200361	542	1	1	1	1	0	1	7700000	NA	2500000	NA	7400000	NA	9100000	NA	NA	NA	21000000	NA		Pf00036, Pf00435, Pf02187, Pf13202, Pf13405, Pf13499, Pf13833	0.077	12.9174
Macf1	None	11426	High	F6YKN8	Microtubule-actin cross-linking factor 1 (Fragment) OS=Mus musculus GN=Macf1 PE=1 SV=1	5.99225	2.57353	1	5	0.000200361	544	1	1	1	1	0	1	7700000	NA	2500000	NA	7400000	NA	9100000	NA	NA	NA	21000000	NA		Pf00036, Pf00435, Pf02187, Pf13202, Pf13405, Pf13499, Pf13833	0.077	12.9174
Macf1	None	11426	High	Q80TZ5	MKIAA0465 protein (Fragment) OS=Mus musculus GN=Macf1 PE=2 SV=2	5.99225	0.942761	1	5	0.000200361	1485	1	1	1	1	0	1	7700000	NA	2500000	NA	7400000	NA	9100000	NA	NA	NA	21000000	NA		Pf00036, Pf00435, Pf02187, Pf13202, Pf13499, Pf13833	0.03	12.9174
Macf1	None	11426	High	F6Q750	Microtubule-actin cross-linking factor 1 (Fragment) OS=Mus musculus GN=Macf1 PE=1 SV=1	5.99225	0.316098	1	5	0.000200361	4429	1	1	1	1	0	1	7700000	NA	2500000	NA	7400000	NA	9100000	NA	NA	NA	21000000	NA		Pf00036, Pf00435, Pf02187, Pf02463, Pf13499, Pf13833	0.009	12.9174
Map7; Mtap7	IsMasterProtein	17761	High	D3YWN7	Ensconsin OS=Mus musculus GN=Map7 PE=4 SV=2	23.9873	9.21409	5	30	0	738	1	0	1	1	1	1	8300000	NA	NA	NA	140000000	NA	64000000	NA	110000000	NA	250000000	NA			0.61	58.2021
Nars2	IsMasterProteinCandidate	244141	High	Q8BXJ6	Putative uncharacterized protein OS=Mus musculus GN=Nars2 PE=2 SV=1	11.2721	8.59539	4	14	0	477	1	0	1	1	1	1	19000000	NA	NA	NA	31000000	NA	20000000	NA	16000000	NA	22000000	NA		Pf00152, Pf01336	0.413	16.9708
Nars2	IsMasterProtein	244141	High	Q8BGV0	Probable asparagine--tRNA ligase, mitochondrial OS=Mus musculus GN=Nars2 PE=1 SV=1	11.2721	8.59539	4	14	0	477	1	0	1	1	1	1	19000000	NA	NA	NA	31000000	NA	20000000	NA	16000000	NA	22000000	NA		Pf00152, Pf01336	0.389	16.9708
Nde1	IsMasterProteinCandidate	67203	High	Q9CZA6	Nuclear distribution protein nudE homolog 1 OS=Mus musculus GN=Nde1 PE=1 SV=1	4.29098	3.48837	1	6	0.000389257	344	1	0	1	1	0	1	6200000	NA	NA	NA	2700000	NA	4700000	NA	5400000	2400000	6800000	NA		Pf00769, Pf04111, Pf04156, Pf04880, Pf08232, Pf12128, Pf13851, Pf13949	0.096	9.95399
Ndel1	IsMasterProtein	83431	High	Q9ERR1	Nuclear distribution protein nudE-like 1 OS=Mus musculus GN=Ndel1 PE=1 SV=2	4.29098	3.47826	1	6	0.000389257	345	1	0	1	1	0	1	6200000	NA	NA	NA	2700000	NA	4700000	NA	5400000	2400000	6800000	NA		Pf01442, Pf04880, Pf09731	0.105	9.95399
Nedd8	IsMasterProtein	18002	High	P29595	NEDD8 OS=Mus musculus GN=Nedd8 PE=1 SV=2	16.3172	34.5679	2	15	0	81	1	0	1	1	0	1	6900000	NA	3200000	580000	3800000	NA	32000000	NA	5100000	1400000	27000000	NA		Pf00240, Pf11976	1.683	27.3597
Nedd8	None	18002	High	Q3TY05	Putative uncharacterized protein (Fragment) OS=Mus musculus GN=Nedd8 PE=2 SV=1	11.2966	20.5882	1	13	0	68	1	0	1	1	0	1	6900000	NA	3200000	580000	3800000	NA	4700000	NA	5100000	1400000	4000000	NA		Pf00240, Pf11976	0.931	20.7276
Nes	IsMasterProtein	18008	High	Q6P5H2	Nestin OS=Mus musculus GN=Nes PE=1 SV=1	5.72839	0.697425	1	7	0.000200361	1864	1	1	1	1	1	1	5400000	NA	4000000	NA	3100000	NA	6400000	NA	2900000	NA	4900000	NA		Pf00038, Pf02463	0.025	18.5313
Nrip1	IsMasterProtein	268903	High	Q8CBD1	Nuclear receptor-interacting protein 1 OS=Mus musculus GN=Nrip1 PE=1 SV=1	51.1265	11.3695	9	47	0	1161	1	1	1	1	1	1	22000000	NA	10000000	NA	56000000	NA	46000000	NA	67000000	NA	39000000	NA			0.624	72.4406
Osbp	IsMasterProtein	76303	High	Q3B7Z2	Oxysterol-binding protein 1 OS=Mus musculus GN=Osbp PE=1 SV=3	18.4028	1.61491	2	16	0	805	1	1	1	0	1	1	18000000	NA	11000000	NA	5000000	NA	6800000	1500000	11000000	NA	14000000	NA		Pf00169, Pf01237, Pf15406, Pf15409, Pf15413	0.252	40.0342
Pde5a	IsMasterProtein	242202	High	Q8CG03	cGMP-specific 3',5'-cyclic phosphodiesterase OS=Mus musculus GN=Pde5a PE=1 SV=2	6.88207	3.12139	2	8	0	865	1	1	0	1	0	1	27000000	NA	19000000	NA	NA	NA	33000000	NA	38000000	14000000	37000000	NA		Pf00233, Pf01590, Pf13185, Pf13492	0.122	12.6063
Pon1	IsMasterProtein	18979	High	P52430	Serum paraoxonase/arylesterase 1 OS=Mus musculus GN=Pon1 PE=1 SV=2	4.35783	3.09859	1	6	0.000389257	355	1	1	1	0	1	1	94000000	NA	78000000	NA	54000000	NA	NA	NA	57000000	NA	70000000	NA		Pf01731, Pf03088, Pf08450	0.179	0
Ppid	IsMasterProteinCandidate	67738	High	Q9CR16	Peptidyl-prolyl cis-trans isomerase D OS=Mus musculus GN=Ppid PE=1 SV=3	5.58386	3.24324	1	10	0.000200361	370	1	1	0	1	1	1	3700000	NA	3200000	NA	NA	NA	2600000	NA	15000000	NA	24000000	NA		Pf00160, Pf00515, Pf07719, Pf13414, Pf13424, Pf13432, Pf14559	0.11	21.3557
Ppid	IsMasterProtein	67738	High	Q3UB60	Putative uncharacterized protein OS=Mus musculus GN=Ppid PE=2 SV=1	5.58386	3.24324	1	10	0.000200361	370	1	1	0	1	1	1	3700000	NA	3200000	NA	NA	NA	2600000	NA	15000000	NA	24000000	NA		Pf00160, Pf00515, Pf07719, Pf13414, Pf13424, Pf13432, Pf14559	0.11	21.3557
Prkacb	IsMasterProtein	18749	High	P68181	cAMP-dependent protein kinase catalytic subunit beta OS=Mus musculus GN=Prkacb PE=1 SV=2	9.50005	7.12251	2	7	0	351	1	1	0	1	1	1	17000000	NA	7600000	NA	NA	NA	16000000	NA	36000000	NA	47000000	NA		Pf00069, Pf07714, Pf14531	0.155	8.93212
Prkacb	None	18749	High	H6TMF6	cAMP-dependent protein kinase catalytic subunit beta transcript variant 6 (Fragment) OS=Mus musculus GN=Prkacb PE=2 SV=1	4.7582	6.97674	1	6	0.000200361	172	1	1	0	1	1	1	17000000	NA	7600000	NA	NA	NA	16000000	NA	36000000	NA	47000000	NA		Pf00069, Pf07714	0.292	8.93212
Prkacb	None	18749	High	H6TMF5	cAMP-dependent protein kinase catalytic subunit beta transcript variant 5 (Fragment) OS=Mus musculus GN=Prkacb PE=2 SV=1	4.7582	6.34921	1	6	0.000200361	189	1	1	0	1	1	1	17000000	NA	7600000	NA	NA	NA	16000000	NA	36000000	NA	47000000	NA		Pf00069, Pf07714	0.334	8.93212
Psmd5	IsMasterProtein	66998	High	Q8BJY1	26S proteasome non-ATPase regulatory subunit 5 OS=Mus musculus GN=Psmd5 PE=1 SV=4	15.3171	10.5159	4	8	0	504	1	0	1	1	0	1	20000000	NA	NA	NA	6400000	NA	54000000	NA	19000000	14000000	33000000	NA		Pf10508	0.212	12.7214
Rab6a	IsMasterProteinCandidate	19346	High	Q3U4W5	RAB6, member RAS oncogene family, isoform CRA_c OS=Mus musculus GN=Rab6a PE=2 SV=1	10.9339	16.8269	3	22	0	208	1	0	1	1	1	1	25000000	NA	NA	NA	30000000	NA	8700000	NA	15000000	NA	12000000	NA		Pf00025, Pf00071, Pf02421, Pf04670, Pf08477, Pf09439	0.585	22.6961
Rab6a	IsMasterProtein	19346	High	P35279	Ras-related protein Rab-6A OS=Mus musculus GN=Rab6a PE=1 SV=4	10.9339	16.8269	3	22	0	208	1	0	1	1	1	1	25000000	NA	NA	NA	30000000	NA	8700000	NA	15000000	NA	12000000	NA		Pf00025, Pf00071, Pf02421, Pf04670, Pf08477, Pf09439	0.585	22.6961
Rars	IsMasterProteinCandidate	104458	High	Q3TVC5	Putative uncharacterized protein (Fragment) OS=Mus musculus GN=Rars PE=2 SV=1	4.12378	2.46085	1	6	0.00054338	447	1	0	1	1	1	0	19000000	NA	NA	NA	17000000	NA	15000000	NA	17000000	NA	23000000	8100000		Pf00750, Pf03485	0.096	7.31759
Rars	IsMasterProtein	104458	High	Q9D0I9	Arginine--tRNA ligase, cytoplasmic OS=Mus musculus GN=Rars PE=2 SV=2	4.12378	1.66667	1	6	0.00054338	660	1	0	1	1	1	0	19000000	NA	NA	NA	17000000	NA	15000000	NA	17000000	NA	23000000	8100000		Pf00750, Pf03485, Pf05746	0.064	7.31759
Samd4	IsMasterProtein	74480	High	Q8CBY1	Protein Smaug homolog 1 OS=Mus musculus GN=Samd4a PE=1 SV=2	21.8223	4.36006	2	13	0	711	1	1	0	0	1	1	11000000	NA	11000000	NA	NA	NA	31000000	6500000	52000000	NA	48000000	NA		Pf00536, Pf07647	0.292	28.3482
Sec24c	IsMasterProteinCandidate	218811	High	Q3V222	Putative uncharacterized protein (Fragment) OS=Mus musculus GN=Sec24c PE=2 SV=1	4.51485	1.99253	1	4	0.000200361	803	0	1	1	0	1	1	NA	NA	NA	NA	NA	NA	NA	NA	NA	NA	39000000	NA		Pf00626, Pf04810, Pf04811, Pf04815, Pf08033	0.068	2.41012
Sec24c	IsMasterProteinCandidate	218811	High	Q80U83	MKIAA0079 protein (Fragment) OS=Mus musculus GN=Sec24c PE=2 SV=1	4.51485	1.55642	1	4	0.000200361	1028	0	1	1	0	1	1	NA	NA	NA	NA	NA	NA	NA	NA	NA	NA	39000000	NA		Pf00626, Pf04810, Pf04811, Pf04815, Pf08033, Pf09770	0.068	2.41012
Sec24c	IsMasterProteinCandidate	218811	High	Q8CGF4	Sec24 related gene family, member C (S. cerevisiae) OS=Mus musculus GN=Sec24c PE=2 SV=1	4.51485	1.45985	1	4	0.000200361	1096	0	1	1	0	1	1	NA	NA	NA	NA	NA	NA	NA	NA	NA	NA	39000000	NA		Pf00626, Pf04810, Pf04811, Pf04815, Pf08033, Pf09770	0.068	2.41012
Sec24c	IsMasterProtein	218811	High	G3X972	Protein Sec24c OS=Mus musculus GN=Sec24c PE=4 SV=1	4.51485	1.45985	1	4	0.000200361	1096	0	1	1	0	1	1	NA	NA	NA	NA	NA	NA	NA	NA	NA	NA	39000000	NA		Pf00626, Pf04810, Pf04811, Pf04815, Pf08033, Pf09770	0.068	2.41012
Slc1a5	None	20514	High	P51912	Neutral amino acid transporter B(0) OS=Mus musculus GN=Slc1a5 PE=1 SV=2	4.87354	2.16998	1	6	0.000200361	553	1	1	1	1	1	1	150000000	NA	94000000	NA	310000000	NA	130000000	NA	99000000	NA	81000000	NA		Pf00375	0.166	4.3121
Slc1a5	IsMasterProteinCandidate	20514	High	Q9ESU7	Amino acid transporter OS=Mus musculus GN=Slc1a5 PE=2 SV=1	23.4465	5.04505	3	42	0	555	1	1	0	1	1	1	130000000	NA	51000000	NA	140000000	2600000	70000000	NA	63000000	NA	50000000	NA		Pf00375	0.931	94.9982
Slc1a5	IsMasterProteinCandidate	20514	High	Q3UFR4	Amino acid transporter OS=Mus musculus GN=Slc1a5 PE=2 SV=1	23.4465	5.04505	3	42	0	555	1	1	0	1	1	1	130000000	NA	51000000	NA	140000000	2600000	70000000	NA	63000000	NA	50000000	NA		Pf00375	0.931	94.9982
Slc1a5	IsMasterProtein	20514	High	Q5U647	Amino acid transporter OS=Mus musculus GN=Slc1a5 PE=2 SV=1	23.4465	5.03597	3	42	0	556	1	1	0	1	1	1	130000000	NA	51000000	NA	140000000	2600000	70000000	NA	63000000	NA	50000000	NA		Pf00375	0.848	94.9982
Sphk2	IsMasterProteinCandidate	56632	High	Q9JIA7	Sphingosine kinase 2 OS=Mus musculus GN=Sphk2 PE=1 SV=2	8.43777	4.86224	2	5	0	617	1	0	1	1	1	0	1700000	NA	NA	NA	2200000	NA	2100000	NA	2000000	NA	NA	NA		Pf00781	0.389	7.27773
Sphk2	IsMasterProtein	56632	High	Q3U912	Putative uncharacterized protein OS=Mus musculus GN=Sphk2 PE=2 SV=1	8.43777	4.86224	2	5	0	617	1	0	1	1	1	0	1700000	NA	NA	NA	2200000	NA	2100000	NA	2000000	NA	NA	NA		Pf00781	0.389	7.27773
Spnb4; Sptbn4	None	80297	High	Q91ZE6	Beta-spectrin 4 OS=Mus musculus GN=Sptbn4 PE=2 SV=1	6.41619	0.430528	1	9	0.000200361	2555	1	0	1	0	1	1	36000000	NA	12000000	13000000	40000000	NA	NA	NA	21000000	NA	35000000	NA		Pf00169, Pf00307, Pf00435, Pf11971, Pf15410	0.031	0
Spnb4; Sptbn4	None	80297	High	E9PX29	Protein Sptbn4 OS=Mus musculus GN=Sptbn4 PE=1 SV=1	6.41619	0.42952	1	9	0.000200361	2561	1	0	1	0	1	1	36000000	NA	12000000	13000000	40000000	NA	NA	NA	21000000	NA	35000000	NA		Pf00169, Pf00307, Pf00435, Pf11971, Pf15410	0.031	0
Spnb4; Sptbn4	None	80297	High	Q8VIE5	BetaIV-spectrin sigma1 OS=Mus musculus GN=Sptbn4 PE=2 SV=1	6.41619	0.42952	1	9	0.000200361	2561	1	0	1	0	1	1	36000000	NA	12000000	13000000	40000000	NA	NA	NA	21000000	NA	35000000	NA		Pf00169, Pf00307, Pf00435, Pf11971, Pf15410	0.031	0
Srp19	IsMasterProteinCandidate	66384	High	Q3UXK5	Putative uncharacterized protein OS=Mus musculus GN=Srp19 PE=2 SV=1	4.14618	15.3846	1	4	0.00054338	78	0	1	1	1	1	0	NA	NA	15000000	NA	31000000	NA	18000000	NA	17000000	NA	NA	NA		Pf01922	1.154	3.74994
Srp19	IsMasterProteinCandidate	66384	High	Q8BZ07	Signal recognition particle 19, isoform CRA_c OS=Mus musculus GN=Srp19 PE=2 SV=1	4.14618	10.6195	1	4	0.00054338	113	0	1	1	1	1	0	NA	NA	15000000	NA	31000000	NA	18000000	NA	17000000	NA	NA	NA		Pf01922	1.154	3.74994
Srp19	IsMasterProteinCandidate	66384	High	G5E8T3	Signal recognition particle 19 kDa protein OS=Mus musculus GN=Srp19 PE=4 SV=1	4.14618	10	1	4	0.00054338	120	0	1	1	1	1	0	NA	NA	15000000	NA	31000000	NA	18000000	NA	17000000	NA	NA	NA		Pf01922	0.389	3.74994
Srp19	IsMasterProteinCandidate	66384	High	Q9CRF7	Putative uncharacterized protein (Fragment) OS=Mus musculus GN=Srp19 PE=2 SV=1	4.14618	8.88889	1	4	0.00054338	135	0	1	1	1	1	0	NA	NA	15000000	NA	31000000	NA	18000000	NA	17000000	NA	NA	NA		Pf01922	0.389	3.74994
Srp19	IsMasterProtein	66384	High	Q9D104	Signal recognition particle 19 kDa protein OS=Mus musculus GN=Srp19 PE=2 SV=1	4.14618	8.33333	1	4	0.00054338	144	0	1	1	1	1	0	NA	NA	15000000	NA	31000000	NA	18000000	NA	17000000	NA	NA	NA		Pf01922	0.389	3.74994
Srp19	IsMasterProteinCandidate	66384	High	Q9D7A6	Signal recognition particle 19 kDa protein OS=Mus musculus GN=Srp19 PE=2 SV=1	4.14618	8.33333	1	4	0.00054338	144	0	1	1	1	1	0	NA	NA	15000000	NA	31000000	NA	18000000	NA	17000000	NA	NA	NA		Pf01922	0.468	3.74994
Srp72	IsMasterProtein	66661	High	F8VQC1	Signal recognition particle subunit SRP72 OS=Mus musculus GN=Srp72 PE=1 SV=1	11.2724	7.89866	4	6	0	671	1	0	1	1	0	1	1400000	NA	NA	NA	10000000	NA	11000000	NA	NA	NA	15000000	NA		Pf08492, Pf12895, Pf13424, Pf14559	0.311	7.83616
Srp72	None	66661	High	Q3UZL8	Putative uncharacterized protein (Fragment) OS=Mus musculus GN=Srp72 PE=2 SV=1	9.11096	6.50995	3	5	0	553	1	0	1	1	0	1	NA	NA	NA	NA	10000000	NA	11000000	NA	NA	NA	15000000	NA		Pf13424, Pf14559	0.25	5.06388
Srp72	None	66661	High	A0JLN1	Srp72 protein (Fragment) OS=Mus musculus GN=Srp72 PE=2 SV=1	9.11096	6.44007	3	5	0	559	1	0	1	1	0	1	NA	NA	NA	NA	10000000	NA	11000000	NA	NA	NA	15000000	NA		Pf13424, Pf14559	0.25	5.06388
Srp72	None	66661	High	A0PJ97	Srp72 protein (Fragment) OS=Mus musculus GN=Srp72 PE=2 SV=1	9.11096	6.44007	3	5	0	559	1	0	1	1	0	1	NA	NA	NA	NA	10000000	NA	11000000	NA	NA	NA	15000000	NA		Pf13424, Pf14559	0.25	5.06388
Stard10	IsMasterProteinCandidate	56018	High	Q9JMD3	PCTP-like protein OS=Mus musculus GN=Stard10 PE=1 SV=1	7.72918	9.62199	2	16	0	291	1	0	1	0	1	1	28000000	NA	18000000	5900000	2400000	NA	21000000	33000000	18000000	NA	27000000	NA		Pf01852	0.425	35.4306
Stard10	IsMasterProteinCandidate	56018	High	Q52LA1	START domain containing 10 (Fragment) OS=Mus musculus GN=Stard10 PE=2 SV=1	7.72918	8.11594	2	16	0	345	1	0	1	0	1	1	28000000	NA	18000000	5900000	2400000	NA	21000000	33000000	18000000	NA	27000000	NA		Pf01852	0.359	35.4306
Stard10	IsMasterProteinCandidate	56018	High	E9PVP0	PCTP-like protein OS=Mus musculus GN=Stard10 PE=1 SV=1	7.72918	7.69231	2	16	0	364	1	0	1	0	1	1	28000000	NA	18000000	5900000	2400000	NA	21000000	33000000	18000000	NA	27000000	NA		Pf01852	0.359	35.4306
Stard10	IsMasterProteinCandidate	56018	High	Q5RL65	Stard10 protein (Fragment) OS=Mus musculus GN=Stard10 PE=2 SV=1	7.72918	7.58808	2	16	0	369	1	0	1	0	1	1	28000000	NA	18000000	5900000	2400000	NA	21000000	33000000	18000000	NA	27000000	NA		Pf01852	0.334	35.4306
Stard10	IsMasterProteinCandidate	56018	High	Q6PDD6	Stard10 protein (Fragment) OS=Mus musculus GN=Stard10 PE=2 SV=1	7.72918	7.29167	2	16	0	384	1	0	1	0	1	1	28000000	NA	18000000	5900000	2400000	NA	21000000	33000000	18000000	NA	27000000	NA		Pf01852	0.311	35.4306
Stard10	IsMasterProtein	56018	High	Q66JR2	Stard10 protein (Fragment) OS=Mus musculus GN=Stard10 PE=2 SV=1	7.72918	6.91358	2	16	0	405	1	0	1	0	1	1	28000000	NA	18000000	5900000	2400000	NA	21000000	33000000	18000000	NA	27000000	NA		Pf01852	0.292	35.4306
Sync	IsMasterProteinCandidate	68828	High	C0LQ88	Syncoilin isoform 3 OS=Mus musculus GN=Sync PE=2 SV=1	10.3909	6.34146	2	5	0	410	1	0	1	0	1	1	9800000	NA	NA	NA	19000000	NA	NA	NA	12000000	NA	27000000	NA		Pf00038	0.292	11.8558
Sync	IsMasterProteinCandidate	68828	High	C0LQ87	Syncoilin isoform 2 OS=Mus musculus GN=Sync PE=2 SV=1	10.3909	5.60345	2	5	0	464	1	0	1	0	1	1	9800000	NA	NA	NA	19000000	NA	NA	NA	12000000	NA	27000000	NA		Pf00038	0.233	11.8558
Sync	IsMasterProtein	68828	High	Q9EPM5	Syncoilin OS=Mus musculus GN=Sync PE=1 SV=1	10.3909	5.53191	2	5	0	470	1	0	1	0	1	1	9800000	NA	NA	NA	19000000	NA	NA	NA	12000000	NA	27000000	NA		Pf00038	0.259	11.8558
Trim28	IsMasterProteinCandidate	21849	High	Q3UDN8	Putative uncharacterized protein (Fragment) OS=Mus musculus GN=Trim28 PE=2 SV=1	25.5706	10.7765	6	17	0	631	1	0	1	0	1	1	11000000	NA	NA	NA	14000000	NA	41000000	1800000	43000000	NA	43000000	NA		Pf00628, Pf00643, Pf07649	0.509	21.0601
Trim28	IsMasterProtein	21849	High	Q62318	Transcription intermediary factor 1-beta OS=Mus musculus GN=Trim28 PE=1 SV=3	25.5706	8.15348	6	17	0	834	1	0	1	0	1	1	11000000	NA	NA	NA	14000000	NA	41000000	1800000	43000000	NA	43000000	NA		Pf00628, Pf00643	0.468	21.0601
Usp7	IsMasterProteinCandidate	252870	High	Q6A4J8	Ubiquitin carboxyl-terminal hydrolase 7 OS=Mus musculus GN=Usp7 PE=1 SV=1	6.11739	2.53853	2	4	0.000200361	1103	1	0	1	1	1	0	6100000	NA	NA	NA	20000000	NA	10000000	NA	13000000	NA	NA	NA		Pf00443, Pf00917, Pf12436, Pf13423, Pf14533	0.096	5.87967
Usp7	IsMasterProteinCandidate	252870	High	F8VPX1	Ubiquitin carboxyl-terminal hydrolase OS=Mus musculus GN=Usp7 PE=1 SV=1	6.11739	2.53853	2	4	0.000200361	1103	1	0	1	1	1	0	6100000	NA	NA	NA	20000000	NA	10000000	NA	13000000	NA	NA	NA		Pf00443, Pf00917, Pf12436, Pf13423, Pf14533	0.094	5.87967
Usp7	IsMasterProtein	252870	High	E9PXY8	Ubiquitin carboxyl-terminal hydrolase OS=Mus musculus GN=Usp7 PE=3 SV=1	6.11739	2.44969	2	4	0.000200361	1143	1	0	1	1	1	0	6100000	NA	NA	NA	20000000	NA	10000000	NA	13000000	NA	NA	NA		Pf00443, Pf00917, Pf12436, Pf13423, Pf14533	0.093	5.87967
Vim	IsMasterProtein	22352	High	Q3TWV0	Putative uncharacterized protein OS=Mus musculus GN=Vim PE=2 SV=1	246.458	55.1502	34	1878	0	466	1	1	1	1	1	1	76000000	NA	2700000	NA	3600000	NA	5600000	NA	5500000	NA	4000000	NA		Pf00038, Pf04111, Pf04732, Pf05622, Pf10186	73.296	3705.84
Vps35	None	65114	High	Q3UQJ1	Putative uncharacterized protein (Fragment) OS=Mus musculus GN=Vps35 PE=2 SV=1	12.9262	4.10959	2	12	0	730	1	0	1	1	0	1	18000000	NA	NA	NA	8700000	NA	18000000	NA	21000000	9500000	25000000	NA		Pf03635	0.122	26.3119
Vps35	None	65114	High	Q3TJ43	Vacuolar protein sorting-associated protein 35 OS=Mus musculus GN=Vps35 PE=2 SV=1	12.9262	3.76884	2	12	0	796	1	0	1	1	0	1	18000000	NA	NA	NA	8700000	NA	18000000	NA	21000000	9500000	25000000	NA		Pf03635	0.108	26.3119
Zc3h14	IsMasterProtein	75553	High	Q8BJ05	Zinc finger CCCH domain-containing protein 14 OS=Mus musculus GN=Zc3h14 PE=1 SV=1	3.25011	1.4966	1	13	0.0058784	735	1	0	1	1	1	0	330000000	NA	NA	NA	220000000	NA	170000000	NA	130000000	NA	NA	NA	Phospho [S365; T367]	Pf12737, Pf14608	0.068	8.96968

## Sheet: D 
Figure 5-source data 2D												0= not present in anti-HNF4a Ab (a445) or control IgG; 1= present in a445 but not IgG; -1 = present in IgG but not a445
All peptides that interact with HNF4a preferentially in a7HMZ colons in which there are 2 or more positives for a7HMZ compared to a1HMZ
												Mouse 1	Mouse 2	Mouse 3	Mouse 1	Mouse 2	Mouse 3
Sym	Master	GeneID	FDR	Acc	Desc	PEP.Score	Coverage (%)	Num.Peptides	Num.PSMs	Qval	AAs	a7HMZ.G67.a445	a7HMZ.G70.a445	a7HMZ.G72.a445	a1HMZ.G63.a445	a1HMZ.G77.a445	a1HMZ.G78.a445	Area.a7HMZ.G67.a445	Area.a7HMZ.G67.a445.IgG	Area.a7HMZ.G70.a445	Area.a7HMZ.G70.a445.IgG	Area.a7HMZ.G72.a445	Area.a7HMZ.G72.a445.IgG	Area.a1HMZ.G63.a445	Area.a1HMZ.G63.a445.IgG	Area.a1HMZ.G77.a445	Area.a1HMZ.G77.a445.IgG	Area.a1HMZ.G78.a445	Area.a1HMZ.G78.a445.IgG	Mods	Pfam	emPAI	Score.Sequest.HT
Aak1; LOC102637099; Gm38495	IsMasterProtein	269774; 102637099	High	Q6PIU9	Uncharacterized protein FLJ45252 homolog OS=Mus musculus PE=1 SV=2	3.77495	4.23729	1	5	0.00054338	354	1	0	1	0	0	0	11000000	NA	NA	NA	1300000	NA	NA	NA	5100000	830000	NA	NA		Pf15282	0.194	13.7351
Abcf1	IsMasterProtein	224742	High	Q6P542	ATP-binding cassette sub-family F member 1 OS=Mus musculus GN=Abcf1 PE=1 SV=1	9.83465	3.46476	2	13	0	837	1	1	1	0	1	0	42000000	NA	33000000	NA	21000000	NA	32000000	17000000	33000000	NA	20000000	13000000		Pf00005, Pf13304	0.145	43.4568
Abcf1	IsMasterProteinCandidate	224742	High	Q5RL55	ATP-binding cassette, sub-family F (GCN20), member 1 OS=Mus musculus GN=Abcf1 PE=2 SV=1	9.83465	3.4689	2	13	0	836	1	1	1	0	1	0	42000000	NA	33000000	NA	21000000	NA	32000000	17000000	33000000	NA	20000000	13000000		Pf00005, Pf13304	0.145	43.4568
Afap1	IsMasterProteinCandidate	70292	High	Q9CT56	Putative uncharacterized protein (Fragment) OS=Mus musculus GN=Afap1 PE=2 SV=1	3.7997	3.02013	1	19	0.00054338	298	0	1	1	0	0	0	5900000	1200000	3400000	NA	1700000	NA	2500000	3100000	6300000	2600000	8100000	2000000		Pf00169	0.292	49.6936
Afap1	IsMasterProtein	70292	High	Q80YS6	Actin filament-associated protein 1 OS=Mus musculus GN=Afap1 PE=1 SV=1	3.7997	1.23119	1	19	0.00054338	731	0	1	1	0	0	0	5900000	1200000	3400000	NA	1700000	NA	2500000	3100000	6300000	2600000	8100000	2000000		Pf00169	0.083	49.6936
Afap1	IsMasterProteinCandidate	70292	High	Q8BV31	Putative uncharacterized protein (Fragment) OS=Mus musculus GN=Afap1 PE=2 SV=1	3.7997	3.0303	1	19	0.00054338	297	0	1	1	0	0	0	5900000	1200000	3400000	NA	1700000	NA	2500000	3100000	6300000	2600000	8100000	2000000		Pf00169	0.292	49.6936
Agl	IsMasterProtein	77559	High	F8VPN4	Protein Agl OS=Mus musculus GN=Agl PE=4 SV=1	32.3983	4.30809	5	47	0	1532	1	1	1	0	0	0	23000000	NA	9300000	NA	12000000	NA	11000000	19000000	22000000	18000000	83000000	12000000		Pf00128, Pf06202, Pf14699, Pf14701, Pf14702	0.287	90.0735
AI314180	None	230249	High	A2ALV7	Protein AI314180 (Fragment) OS=Mus musculus GN=AI314180 PE=4 SV=1	11.7735	1.94631	2	15	0	1490	1	0	1	0	0	0	18000000	NA	NA	NA	20000000	NA	16000000	3900000	22000000	5200000	32000000	2900000		Pf13001	0.107	38.6664
Akr1c14	IsMasterProtein	105387	High	Q91WT7	3-alpha-hydroxysteroid dehydrogenase type 1 OS=Mus musculus GN=Akr1c14 PE=2 SV=1	6.86795	6.81115	2	10	0	323	1	1	1	0	0	0	24000000	NA	19000000	NA	38000000	NA	47000000	29000000	57000000	28000000	73000000	38000000		Pf00248	0.334	19.8124
Aldh7a1	IsMasterProtein	110695	High	Q9DBF1	Alpha-aminoadipic semialdehyde dehydrogenase OS=Mus musculus GN=Aldh7a1 PE=1 SV=4	10.3862	5.38033	2	14	0	539	1	1	0	0	0	0	8900000	NA	19000000	NA	NA	NA	9500000	18000000	10000000	22000000	15000000	14000000		Pf00171	0.233	25.6866
Arl8a	IsMasterProtein	68724	High	Q8VEH3	ADP-ribosylation factor-like protein 8A OS=Mus musculus GN=Arl8a PE=2 SV=1	7.49387	7.52688	1	3	0	186	1	0	1	0	0	-1	9000000	NA	NA	NA	9300000	NA	NA	NA	NA	NA	NA	6400000		Pf00025, Pf00071, Pf00503, Pf04670, Pf08477, Pf09439	0.585	8.71386
Arpc4	IsMasterProtein	68089	High	P59999	Actin-related protein 2/3 complex subunit 4 OS=Mus musculus GN=Arpc4 PE=1 SV=3	4.45429	11.3095	2	6	0.000200361	168	0	1	1	0	-1	0	NA	NA	76000000	NA	58000000	NA	110000000	16000000	NA	14000000	NA	NA		Pf05856	0.52	0
Arpc4	IsMasterProteinCandidate	68089	High	Q9D3C4	Putative uncharacterized protein OS=Mus musculus GN=Arpc4 PE=2 SV=1	4.45429	11.3095	2	6	0.000200361	168	0	1	1	0	-1	0	NA	NA	76000000	NA	58000000	NA	110000000	16000000	NA	14000000	NA	NA		Pf05856	0.52	0
Arpc4	IsMasterProteinCandidate	68089	High	Q8BVW6	Putative uncharacterized protein OS=Mus musculus GN=Arpc4 PE=2 SV=1	4.45429	11.3095	2	6	0.000200361	168	0	1	1	0	-1	0	NA	NA	76000000	NA	58000000	NA	110000000	16000000	NA	14000000	NA	NA		Pf05856	0.52	0
Arpc4	IsMasterProteinCandidate	68089	High	Q7TPD9	Arpc4 protein OS=Mus musculus GN=Arpc4 PE=2 SV=1	4.45429	11.3095	2	6	0.000200361	168	0	1	1	0	-1	0	NA	NA	76000000	NA	58000000	NA	110000000	16000000	NA	14000000	NA	NA		Pf05856	0.52	0
Atad3a	IsMasterProtein	108888	High	Q925I1	ATPase family AAA domain-containing protein 3 OS=Mus musculus GN=Atad3 PE=1 SV=1	4.97922	2.36887	1	10	0.000200361	591	1	0	1	0	0	0	5700000	NA	NA	NA	3200000	NA	7800000	7600000	6400000	4400000	9900000	11000000		Pf00004, Pf00910, Pf01078, Pf05707, Pf06745, Pf07728, Pf12037, Pf13207, Pf13401	0.07	23.0442
AW549877	IsMasterProtein	106064	High	Q8BR90	UPF0600 protein C5orf51 homolog OS=Mus musculus PE=2 SV=1	5.0063	4.7619	1	6	0.000200361	294	1	0	1	0	0	0	7400000	NA	NA	NA	3600000	NA	12000000	3900000	14000000	3000000	NA	NA			0.166	9.96228
Btf3	IsMasterProteinCandidate	218490	High	Q3UJR8	Transcription factor BTF3 OS=Mus musculus GN=Btf3 PE=2 SV=1	14.4659	11.7284	1	25	0	162	0	1	1	0	0	0	NA	26000000	49000000	NA	9500000	NA	8800000	8500000	10000000	6900000	25000000	7200000		Pf01849	0.931	72.8925
Btf3	IsMasterProtein	218490	High	Q64152	Transcription factor BTF3 OS=Mus musculus GN=Btf3 PE=1 SV=3	14.4659	9.31373	1	25	0	204	0	1	1	0	0	0	NA	26000000	49000000	NA	9500000	NA	8800000	8500000	10000000	6900000	25000000	7200000		Pf01849	0.668	72.8925
C4a	IsMasterProteinCandidate	625018	High	B9EIU2	C4a protein OS=Mus musculus GN=C4a PE=2 SV=1	3.52988	0.691643	1	8	0.00178031	1735	1	1	1	0	0	1	170000000	NA	140000000	NA	210000000	NA	NA	NA	NA	NA	13000000	NA		Pf00207, Pf01759, Pf01821, Pf01835, Pf07677, Pf07678, Pf07703, Pf10569, Pf11974, Pf13249	0.031	5.9787
C4a	IsMasterProteinCandidate	625018	High	V9GZG9	MHC class III H2-Slp (haplotype a) sex-limited protein mRNA (Fragment) OS=Mus musculus PE=2 SV=1	3.52988	0.699301	1	8	0.00178031	1716	1	1	1	0	0	1	170000000	NA	140000000	NA	210000000	NA	NA	NA	NA	NA	13000000	NA		Pf00207, Pf01759, Pf01821, Pf01835, Pf07677, Pf07678, Pf07703, Pf10569, Pf11974, Pf13249	0.032	5.9787
C4a	IsMasterProteinCandidate	625018	High	V9GZQ6	Sex-limited protein OS=Mus musculus GN=Slp PE=4 SV=1	3.52988	0.691643	1	8	0.00178031	1735	1	1	1	0	0	1	170000000	NA	140000000	NA	210000000	NA	NA	NA	NA	NA	13000000	NA		Pf00207, Pf01759, Pf01821, Pf01835, Pf07677, Pf07678, Pf07703, Pf10569, Pf11974, Pf13249	0.033	5.9787
C4a	IsMasterProteinCandidate	625018	High	V9GZJ5	Sex-limited protein OS=Mus musculus PE=2 SV=1	3.52988	0.691643	1	8	0.00178031	1735	1	1	1	0	0	1	170000000	NA	140000000	NA	210000000	NA	NA	NA	NA	NA	13000000	NA		Pf00207, Pf01759, Pf01821, Pf01835, Pf07677, Pf07678, Pf07703, Pf10569, Pf11974, Pf13249	0.032	5.9787
C4a	IsMasterProteinCandidate	625018	High	V9GZK9	Sex-limited protein (Fragment) OS=Mus musculus GN=Slp PE=4 SV=1	3.52988	1.65062	1	8	0.00178031	727	1	1	1	0	0	1	170000000	NA	140000000	NA	210000000	NA	NA	NA	NA	NA	13000000	NA		Pf01759, Pf07677, Pf07678, Pf13249	0.086	5.9787
C4b	IsMasterProteinCandidate	12268	High	B2RXW7	Complement component 4B (Childo blood group) OS=Mus musculus GN=C4b PE=2 SV=1	3.52988	0.690449	1	8	0.00178031	1738	1	1	1	0	0	1	170000000	NA	140000000	NA	210000000	NA	NA	NA	NA	NA	13000000	NA		Pf00207, Pf01759, Pf01821, Pf01835, Pf07677, Pf07678, Pf07703, Pf10569, Pf11974, Pf13249	0.032	5.9787
C4b	IsMasterProtein	12268	High	B2RWX2	Complement component 4B (Childo blood group) OS=Mus musculus GN=C4b PE=2 SV=1	3.52988	0.690449	1	8	0.00178031	1738	1	1	1	0	0	1	170000000	NA	140000000	NA	210000000	NA	NA	NA	NA	NA	13000000	NA		Pf00207, Pf01759, Pf01821, Pf01835, Pf07677, Pf07678, Pf07703, Pf10569, Pf11974, Pf13249	0.032	5.9787
C4b	IsMasterProteinCandidate	12268	High	P01029	Complement C4-B OS=Mus musculus GN=C4b PE=1 SV=3	3.52988	0.690449	1	8	0.00178031	1738	1	1	1	0	0	1	170000000	NA	140000000	NA	210000000	NA	NA	NA	NA	NA	13000000	NA		Pf00207, Pf01759, Pf01821, Pf01835, Pf07677, Pf07678, Pf07703, Pf10569, Pf11974, Pf13249	0.032	5.9787
Cad	IsMasterProtein	69719	High	B2RQC6	CAD protein OS=Mus musculus GN=Cad PE=2 SV=1	15.4284	1.03371	2	16	0	2225	1	1	1	0	1	0	3000000	NA	6300000	NA	NA	NA	2400000	670000	2300000	NA	6700000	5000000		Pf00117, Pf00185, Pf00289, Pf00988, Pf01071, Pf01979, Pf02142, Pf02222, Pf02729, Pf02786, Pf02787, Pf07478, Pf07722, Pf08443, Pf13147, Pf13535, Pf13594, Pf15632	0.095	22.9679
Cad	IsMasterProteinCandidate	69719	High	G3UWN2	CAD protein OS=Mus musculus GN=Cad PE=3 SV=1	15.4284	1.06285	2	16	0	2164	1	1	1	0	1	0	3000000	NA	6300000	NA	NA	NA	2400000	670000	2300000	NA	6700000	5000000		Pf00117, Pf00185, Pf00289, Pf00988, Pf01071, Pf01979, Pf02142, Pf02222, Pf02729, Pf02786, Pf02787, Pf07478, Pf07722, Pf08443, Pf13147, Pf13535, Pf13594, Pf15632	0.099	22.9679
Cald1	None	109624	High	Q8VD79	H-caldesmon (Fragment) OS=Mus musculus GN=Cald1 PE=2 SV=1	58.691	21.4953	8	125	0	321	1	0	1	0	0	0	620000000	NA	NA	NA	23000000	NA	350000000	420000000	620000000	52000000	74000000	26000000			4.08	266.078
Camk2b	IsMasterProteinCandidateRejected	12323	High	P28652	Calcium/calmodulin-dependent protein kinase type II subunit beta OS=Mus musculus GN=Camk2b PE=1 SV=2	17.5036	6.64207	3	35	0	542	0	1	1	0	0	0	42000000	20000000	32000000	NA	37000000	NA	50000000	17000000	14000000	39000000	51000000	29000000		Pf00069, Pf07714, Pf08332, Pf12680, Pf13474, Pf14534	0.551	29.3277
Camk2b	IsMasterProteinCandidateRejected	12323	High	Q5SVI3	Calcium/calmodulin-dependent protein kinase type II subunit beta OS=Mus musculus GN=Camk2b PE=1 SV=1	17.5036	6.94981	3	35	0	518	0	1	1	0	0	0	42000000	20000000	32000000	NA	37000000	NA	50000000	17000000	14000000	39000000	51000000	29000000		Pf00069, Pf07714, Pf08332, Pf12680, Pf13474, Pf14534	0.585	29.3277
Camk2b	IsMasterProteinCandidateRejected	12323	High	Q5SVI9	Calcium/calmodulin-dependent protein kinase type II subunit beta OS=Mus musculus GN=Camk2b PE=1 SV=1	17.5036	7.51566	3	35	0	479	0	1	1	0	0	0	42000000	20000000	32000000	NA	37000000	NA	50000000	17000000	14000000	39000000	51000000	29000000		Pf00069, Pf07714, Pf08332, Pf12680, Pf13474, Pf14534	0.624	29.3277
Camk2b	IsMasterProteinCandidateRejected	12323	High	Q3TY93	Putative uncharacterized protein OS=Mus musculus GN=Camk2b PE=2 SV=1	17.5036	9.62567	3	35	0	374	0	1	1	0	0	0	42000000	20000000	32000000	NA	37000000	NA	50000000	17000000	14000000	39000000	51000000	29000000		Pf00069, Pf07714, Pf08332, Pf12680, Pf13474, Pf14534	0.778	29.3277
Camk2b	IsMasterProteinCandidateRejected	12323	High	Q5SVI0	Calcium/calmodulin-dependent protein kinase type II subunit beta OS=Mus musculus GN=Camk2b PE=1 SV=1	17.5036	6.94981	3	35	0	518	0	1	1	0	0	0	42000000	20000000	32000000	NA	37000000	NA	50000000	17000000	14000000	39000000	51000000	29000000		Pf00069, Pf07714, Pf08332, Pf12680, Pf13474, Pf14534	0.551	29.3277
Camk2b	IsMasterProteinRejected	12323	High	Q5SVJ0	Calcium/calmodulin-dependent protein kinase II, beta, isoform CRA_b OS=Mus musculus GN=Camk2b PE=4 SV=1	17.5036	5.40541	3	35	0	666	0	1	1	0	0	0	42000000	20000000	32000000	NA	37000000	NA	50000000	17000000	14000000	39000000	51000000	29000000		Pf00069, Pf07714, Pf08332, Pf12680, Pf13474, Pf14534	0.468	29.3277
Camk2b	IsMasterProteinCandidateRejected	12323	High	Q8BL41	Putative uncharacterized protein OS=Mus musculus GN=Camk2b PE=2 SV=1	17.5036	6.64207	3	35	0	542	0	1	1	0	0	0	42000000	20000000	32000000	NA	37000000	NA	50000000	17000000	14000000	39000000	51000000	29000000		Pf00069, Pf07714, Pf08332, Pf12680, Pf13474, Pf14534	0.551	29.3277
Camk2b	IsMasterProteinCandidateRejected	12323	High	Q5SVJ1	Calcium/calmodulin-dependent protein kinase type II subunit beta OS=Mus musculus GN=Camk2b PE=1 SV=1	17.5036	7.15706	3	35	0	503	0	1	1	0	0	0	42000000	20000000	32000000	NA	37000000	NA	50000000	17000000	14000000	39000000	51000000	29000000		Pf00069, Pf07714, Pf08332, Pf12680, Pf13474, Pf14534	0.585	29.3277
Camk2b	IsMasterProteinCandidateRejected	12323	High	Q5SVI1	Calcium/calmodulin-dependent protein kinase type II subunit beta OS=Mus musculus GN=Camk2b PE=1 SV=1	17.5036	6.11205	3	35	0	589	0	1	1	0	0	0	42000000	20000000	32000000	NA	37000000	NA	50000000	17000000	14000000	39000000	51000000	29000000		Pf00069, Pf07714, Pf08332, Pf12680, Pf13474, Pf14534	0.52	29.3277
Camk2b	IsMasterProteinCandidateRejected	12323	High	Q68EG2	Calcium/calmodulin-dependent protein kinase type II subunit beta OS=Mus musculus GN=Camk2b PE=2 SV=1	17.5036	6.6055	3	35	0	545	0	1	1	0	0	0	42000000	20000000	32000000	NA	37000000	NA	50000000	17000000	14000000	39000000	51000000	29000000		Pf00069, Pf07714, Pf08332, Pf12680, Pf13474, Pf14534	0.585	29.3277
Camk2b	IsMasterProteinCandidateRejected	12323	High	Q5SVI2	Calcium/calmodulin-dependent protein kinase type II subunit beta OS=Mus musculus GN=Camk2b PE=1 SV=1	17.5036	6.80529	3	35	0	529	0	1	1	0	0	0	42000000	20000000	32000000	NA	37000000	NA	50000000	17000000	14000000	39000000	51000000	29000000		Pf00069, Pf07714, Pf08332, Pf12680, Pf13474, Pf14534	0.551	29.3277
Cct3	None	12462	High	Q9R1U1	Chaperonin containing TCP-1 gamma subunit (Fragment) OS=Mus musculus GN=Cctg PE=4 SV=1	8.13488	31.25	1	10	0	48	1	0	1	0	0	0	19000000	NA	NA	NA	5400000	NA	13000000	7200000	110000000	6100000	120000000	6700000		Pf00118	0.778	11.815
Cct5	IsMasterProtein	12465	High	P80316	T-complex protein 1 subunit epsilon OS=Mus musculus GN=Cct5 PE=1 SV=1	22.9196	8.31793	3	21	0	541	1	0	1	0	0	0	18000000	NA	7500000	14000000	25000000	NA	23000000	30000000	25000000	9100000	48000000	14000000		Pf00118	0.468	40.4978
Cdc37	IsMasterProtein	12539	High	Q61081	Hsp90 co-chaperone Cdc37 OS=Mus musculus GN=Cdc37 PE=2 SV=1	8.22486	8.97098	2	12	0	379	0	1	1	1	0	-1	34000000	19000000	27000000	NA	18000000	NA	56000000	NA	31000000	8600000	NA	6900000		Pf03234, Pf04111, Pf08564, Pf08565, Pf10211	0.334	35.5515
Cdc42bpb	IsMasterProteinCandidate	217866	High	Q7TT50	Serine/threonine-protein kinase MRCK beta OS=Mus musculus GN=Cdc42bpb PE=1 SV=2	13.4046	1.80969	2	16	0	1713	0	1	1	0	0	0	32000000	12000000	12000000	NA	11000000	NA	7900000	23000000	22000000	21000000	23000000	18000000		Pf00069, Pf00130, Pf00261, Pf00433, Pf00769, Pf00780, Pf00786, Pf01576, Pf02463, Pf03148, Pf03962, Pf04111, Pf04156, Pf04849, Pf05276, Pf05483, Pf05557, Pf05622, Pf05667, Pf05701, Pf06008, Pf06160, Pf07111, Pf07321, Pf07714, Pf07888, Pf07926, Pf08317, Pf08826, Pf09726, Pf09728, Pf09730, Pf09731, Pf09787, Pf10174, Pf10473, Pf10498, Pf12072, Pf12128, Pf12718, Pf12795, Pf13514, Pf13851, Pf13868, Pf1…	0.06	28.4996
Cdc42bpb	IsMasterProtein	217866	High	B2RQQ7	Non-specific serine/threonine protein kinase OS=Mus musculus GN=Cdc42bpb PE=2 SV=1	13.4046	1.80969	2	16	0	1713	0	1	1	0	0	0	32000000	12000000	12000000	NA	11000000	NA	7900000	23000000	22000000	21000000	23000000	18000000		Pf00069, Pf00130, Pf00261, Pf00433, Pf00769, Pf00780, Pf00786, Pf01576, Pf02463, Pf03148, Pf03962, Pf04111, Pf04156, Pf04849, Pf05276, Pf05483, Pf05557, Pf05622, Pf05667, Pf05701, Pf06008, Pf06160, Pf07321, Pf07714, Pf07888, Pf08826, Pf09321, Pf09726, Pf09728, Pf09730, Pf09731, Pf09787, Pf10174, Pf10473, Pf10498, Pf12072, Pf12128, Pf12718, Pf12795, Pf13514, Pf13851, Pf13868, Pf13870, Pf14817, Pf1…	0.06	28.4996
Chdh	IsMasterProteinCandidate	218865	High	Q8BIU1	Putative uncharacterized protein OS=Mus musculus GN=Chdh PE=2 SV=1	4.51272	2.82828	1	4	0.000200361	495	1	0	1	0	0	0	5400000	NA	NA	NA	1600000	NA	5400000	4000000	NA	NA	NA	NA		Pf00732, Pf05199	0.129	7.74043
Chdh	IsMasterProtein	218865	High	Q8BJ64	Choline dehydrogenase, mitochondrial OS=Mus musculus GN=Chdh PE=1 SV=1	4.51272	2.34899	1	4	0.000200361	596	1	0	1	0	0	0	5400000	NA	NA	NA	1600000	NA	5400000	4000000	NA	NA	NA	NA		Pf00732, Pf01266, Pf05199, Pf05834, Pf13450	0.083	7.74043
Ckm	IsMasterProtein	12715	High	P07310	Creatine kinase M-type OS=Mus musculus GN=Ckm PE=1 SV=1	46.414	23.3596	6	61	0	381	0	1	1	0	0	0	120000000	11000000	31000000	NA	33000000	NA	110000000	27000000	270000000	83000000	400000000	65000000		Pf00217, Pf02807	1.228	128.07
Ckm	IsMasterProteinCandidate	12715	High	Q9D6U7	Putative uncharacterized protein OS=Mus musculus GN=Ckm PE=2 SV=1	46.414	23.3596	6	61	0	381	0	1	1	0	0	0	120000000	11000000	31000000	NA	33000000	NA	110000000	27000000	270000000	83000000	400000000	65000000		Pf00217, Pf02807	1.228	128.07
Cnn2	IsMasterProtein	12798	High	Q08093	Calponin-2 OS=Mus musculus GN=Cnn2 PE=1 SV=1	8.09356	5.57377	1	15	0	305	1	0	1	0	0	0	73000000	NA	NA	NA	27000000	NA	100000000	21000000	120000000	28000000	120000000	15000000		Pf00307, Pf00402	0.179	43.0471
Copz1	IsMasterProtein	56447	High	Q542M2	Coatomer protein complex, subunit zeta 1, isoform CRA_c OS=Mus musculus GN=Copz1 PE=2 SV=1	5.84013	7.9096	1	15	0.000200361	177	1	1	0	0	0	0	37000000	NA	40000000	NA	46000000	12000000	46000000	NA	42000000	25000000	68000000	44000000		Pf01217	0.778	39.2813
Copz1	IsMasterProteinCandidate	56447	High	Q8R3M1	Copz1 protein OS=Mus musculus GN=Copz1 PE=2 SV=1	5.84013	8.58896	1	15	0.000200361	163	1	1	0	0	0	0	37000000	NA	40000000	NA	46000000	12000000	46000000	NA	42000000	25000000	68000000	44000000		Pf01217	0.585	39.2813
Cpeb2	None	231207	High	Q812E0	Cytoplasmic polyadenylation element-binding protein 2 OS=Mus musculus GN=Cpeb2 PE=1 SV=1	5.82798	3.07102	1	9	0.000200361	521	1	0	1	0	0	0	5700000	NA	NA	NA	NA	NA	5600000	1900000	5400000	1400000	4400000	2000000		Pf00076, Pf14259	0.136	21.4667
Cpeb2	None	231207	High	E9Q5X2	Cytoplasmic polyadenylation element-binding protein 2 OS=Mus musculus GN=Cpeb2 PE=4 SV=1	5.82798	1.6129	1	9	0.000200361	992	1	0	1	0	0	0	5700000	NA	NA	NA	NA	NA	5600000	1900000	5400000	1400000	4400000	2000000		Pf00076, Pf14259	0.11	21.4667
Cpeb2	None	231207	High	E9Q969	Cytoplasmic polyadenylation element-binding protein 2 OS=Mus musculus GN=Cpeb2 PE=4 SV=1	5.82798	1.57791	1	9	0.000200361	1014	1	0	1	0	0	0	5700000	NA	NA	NA	NA	NA	5600000	1900000	5400000	1400000	4400000	2000000		Pf00076, Pf14259	0.11	21.4667
Cpeb3	None	208922	High	A1A562	Cpeb3 protein OS=Mus musculus GN=Cpeb3 PE=2 SV=1	5.82798	3.3543	1	9	0.000200361	477	1	0	1	0	0	0	5700000	NA	NA	NA	NA	NA	5600000	1900000	5400000	1400000	4400000	2000000		Pf00076, Pf14259	0.155	21.4667
Cpeb3	None	208922	High	Q7TN99	Cytoplasmic polyadenylation element-binding protein 3 OS=Mus musculus GN=Cpeb3 PE=1 SV=1	5.82798	2.23464	1	9	0.000200361	716	1	0	1	0	0	0	5700000	NA	NA	NA	NA	NA	5600000	1900000	5400000	1400000	4400000	2000000		Pf00076, Pf14259	0.122	21.4667
Cpeb3	None	208922	High	D3Z1R6	Cytoplasmic polyadenylation element-binding protein 3 OS=Mus musculus GN=Cpeb3 PE=4 SV=1	5.82798	2.33577	1	9	0.000200361	685	1	0	1	0	0	0	5700000	NA	NA	NA	NA	NA	5600000	1900000	5400000	1400000	4400000	2000000		Pf00076, Pf14259	0.129	21.4667
Cpeb4	IsMasterProtein	67579	High	Q7TN98	Cytoplasmic polyadenylation element-binding protein 4 OS=Mus musculus GN=Cpeb4 PE=1 SV=1	11.9233	4.38957	2	10	0	729	1	0	1	0	0	0	5700000	NA	NA	NA	NA	NA	3900000	1900000	5400000	1400000	4400000	2000000		Pf00076, Pf14259	0.212	24.7855
Cpeb4	IsMasterProteinCandidate	67579	High	Q5SU47	Cytoplasmic polyadenylation element-binding protein 4 (Fragment) OS=Mus musculus GN=Cpeb4 PE=4 SV=1	11.9233	8.16327	2	10	0	392	1	0	1	0	0	0	5700000	NA	NA	NA	NA	NA	3900000	1900000	5400000	1400000	4400000	2000000		Pf00076, Pf14259	0.311	24.7855
Cpeb4	IsMasterProteinCandidate	67579	High	Q5SU48	Cytoplasmic polyadenylation element-binding protein 4 OS=Mus musculus GN=Cpeb4 PE=1 SV=1	11.9233	4.49438	2	10	0	712	1	0	1	0	0	0	5700000	NA	NA	NA	NA	NA	3900000	1900000	5400000	1400000	4400000	2000000		Pf00076, Pf14259	0.222	24.7855
Cpeb4	None	67579	High	Q9D5F3	Putative uncharacterized protein OS=Mus musculus GN=Cpeb4 PE=2 SV=1	5.82798	5.42373	1	9	0.000200361	295	1	0	1	0	0	0	5700000	NA	NA	NA	NA	NA	5600000	1900000	5400000	1400000	4400000	2000000		Pf00076, Pf14259	0.233	21.4667
Cpeb4	None	67579	High	Q9D5G2	Putative uncharacterized protein OS=Mus musculus GN=Cpeb4 PE=2 SV=1	5.82798	5.42373	1	9	0.000200361	295	1	0	1	0	0	0	5700000	NA	NA	NA	NA	NA	5600000	1900000	5400000	1400000	4400000	2000000		Pf00076, Pf14259	0.233	21.4667
Cryab	IsMasterProtein	12955	High	P23927	Alpha-crystallin B chain OS=Mus musculus GN=Cryab PE=1 SV=2	20.0212	20	3	31	0	175	1	0	1	0	0	0	90000000	NA	NA	NA	30000000	NA	110000000	27000000	130000000	21000000	150000000	15000000		Pf00011, Pf00525	1.512	29.8113
Cul4a	IsMasterProtein	99375	High	Q3TCH7	Cullin-4A OS=Mus musculus GN=Cul4a PE=1 SV=1	3.37634	1.44928	1	11	0.0040007	759	1	1	1	0	0	-1	9600000	NA	6700000	NA	7000000	NA	7400000	4600000	2700000	4600000	NA	2400000		Pf00888, Pf10557	0.046	21.2158
Cul4a	IsMasterProteinCandidate	99375	High	Q8R1T2	Cul4a protein OS=Mus musculus GN=Cul4a PE=2 SV=1	3.37634	1.85185	1	11	0.0040007	594	1	1	1	0	0	-1	9600000	NA	6700000	NA	7000000	NA	7400000	4600000	2700000	4600000	NA	2400000		Pf00888, Pf10557	0.058	21.2158
Cul4a	IsMasterProteinCandidate	99375	High	Q3UD60	Putative uncharacterized protein (Fragment) OS=Mus musculus GN=Cul4a PE=2 SV=1	3.37634	2.54042	1	11	0.0040007	433	1	1	1	0	0	-1	9600000	NA	6700000	NA	7000000	NA	7400000	4600000	2700000	4600000	NA	2400000		Pf00888	0.08	21.2158
Cul4a	IsMasterProteinCandidate	99375	High	Q3TLY0	Putative uncharacterized protein OS=Mus musculus GN=Cul4a PE=2 SV=1	3.37634	4.15094	1	11	0.0040007	265	1	1	1	0	0	-1	9600000	NA	6700000	NA	7000000	NA	7400000	4600000	2700000	4600000	NA	2400000		Pf00888	0.136	21.2158
Cyb5r3	IsMasterProteinCandidate	109754	High	Q9DCN2	NADH-cytochrome b5 reductase 3 OS=Mus musculus GN=Cyb5r3 PE=1 SV=3	6.59176	6.31229	1	12	0	301	0	1	1	0	0	0	NA	NA	27000000	NA	35000000	NA	68000000	14000000	73000000	18000000	110000000	13000000		Pf00175, Pf00970	0.212	27.271
Cyb5r3	IsMasterProteinCandidate	109754	High	Q9CY59	NADH-cytochrome b5 reductase OS=Mus musculus GN=Cyb5r3 PE=2 SV=1	6.59176	6.29139	1	12	0	302	0	1	1	0	0	0	NA	NA	27000000	NA	35000000	NA	68000000	14000000	73000000	18000000	110000000	13000000		Pf00175, Pf00970	0.179	27.271
Cyfip1	None	20430	High	Q8C8R2	Putative uncharacterized protein OS=Mus musculus GN=Cyfip1 PE=2 SV=1	11.3336	6.43016	2	17	0	451	1	1	1	0	0	0	12000000	NA	7000000	NA	8000000	NA	15000000	4200000	16000000	3100000	25000000	2600000		Pf07159	0.259	40.5009
Dctn2	IsMasterProtein	69654	High	Q3TPZ5	Dynactin 2 OS=Mus musculus GN=Dctn2 PE=2 SV=1	21.7583	16.4179	4	11	0	402	1	1	1	0	0	0	33000000	NA	11000000	NA	29000000	NA	30000000	19000000	40000000	20000000	58000000	23000000		Pf04912	0.35	12.4976
Dnpep	IsMasterProteinCandidate	13437	High	Q8BPW9	Aspartyl aminopeptidase OS=Mus musculus GN=Dnpep PE=2 SV=1	5.75802	2.12766	1	12	0.000200361	470	0	1	1	0	0	-1	28000000	12000000	14000000	NA	12000000	NA	15000000	10000000	39000000	15000000	NA	12000000		Pf02127	0.274	0
Dnpep	IsMasterProteinCandidate	13437	High	Q8CAJ7	Putative uncharacterized protein OS=Mus musculus GN=Dnpep PE=2 SV=1	5.75802	2.11416	1	12	0.000200361	473	0	1	1	0	0	-1	28000000	12000000	14000000	NA	12000000	NA	15000000	10000000	39000000	15000000	NA	12000000		Pf02127	0.274	0
Dnpep	IsMasterProtein	13437	High	Q3TVK3	Aspartyl aminopeptidase OS=Mus musculus GN=Dnpep PE=2 SV=1	5.75802	2.10526	1	12	0.000200361	475	0	1	1	0	0	-1	28000000	12000000	14000000	NA	12000000	NA	15000000	10000000	39000000	15000000	NA	12000000		Pf02127	0.274	0
Dnpep	IsMasterProteinCandidate	13437	High	Q9Z2W0	Aspartyl aminopeptidase OS=Mus musculus GN=Dnpep PE=2 SV=2	5.75802	2.11416	1	12	0.000200361	473	0	1	1	0	0	-1	28000000	12000000	14000000	NA	12000000	NA	15000000	10000000	39000000	15000000	NA	12000000		Pf02127	0.274	0
Dpysl3	IsMasterProteinCandidate	22240	High	Q3TAS8	Putative uncharacterized protein OS=Mus musculus GN=Dpysl3 PE=2 SV=1	30.9918	26.6667	6	39	0	315	1	0	1	0	0	0	64000000	NA	41000000	11000000	87000000	NA	150000000	49000000	140000000	25000000	77000000	14000000		Pf01979, Pf07969, Pf13147	1.371	83.0244
Dpysl3	IsMasterProtein	22240	High	E9PWE8	Dihydropyrimidinase-related protein 3 OS=Mus musculus GN=Dpysl3 PE=1 SV=1	30.9918	12.2987	6	39	0	683	1	0	1	0	0	0	64000000	NA	41000000	11000000	87000000	NA	150000000	49000000	140000000	25000000	77000000	14000000		Pf01979, Pf04909, Pf13147, Pf13594	0.61	83.0244
Dpysl3	IsMasterProteinCandidate	22240	High	Q62188	Dihydropyrimidinase-related protein 3 OS=Mus musculus GN=Dpysl3 PE=1 SV=1	30.9918	14.7368	6	39	0	570	1	0	1	0	0	0	64000000	NA	41000000	11000000	87000000	NA	150000000	49000000	140000000	25000000	77000000	14000000		Pf01979, Pf04909, Pf13147, Pf13594	0.778	83.0244
Dpysl3	IsMasterProteinCandidate	22240	High	Q3TT92	Dihydropyrimidinase-related protein 3 OS=Mus musculus GN=Dpysl3 PE=2 SV=1	30.9918	14.7887	6	39	0	568	1	0	1	0	0	0	64000000	NA	41000000	11000000	87000000	NA	150000000	49000000	140000000	25000000	77000000	14000000		Pf01979, Pf04909, Pf13147, Pf13594	0.778	83.0244
Dusp3	None	72349	High	Q3V2Y9	Dual-specificity protein phosphatase 3 OS=Mus musculus GN=Dusp3 PE=2 SV=1	19.3133	33.3333	3	59	0	117	0	1	1	0	0	0	63000000	1800000	29000000	NA	19000000	NA	90000000	28000000	94000000	20000000	86000000	10000000		Pf00102, Pf00782	5.31	101.984
Ehd3	None	57440	High	Q9QXY6	EH domain-containing protein 3 OS=Mus musculus GN=Ehd3 PE=1 SV=2	7.3612	4.11215	2	10	0	535	1	0	1	0	0	0	46000000	NA	NA	NA	33000000	NA	58000000	21000000	73000000	31000000	69000000	22000000		Pf00350, Pf01926, Pf12763	0.101	15.5723
Ehd4	None	98878	High	Q3TQ74	Putative uncharacterized protein (Fragment) OS=Mus musculus GN=Ehd4 PE=2 SV=1	22.3476	18.0982	6	24	0	326	1	0	1	0	0	0	46000000	NA	NA	NA	28000000	NA	65000000	18000000	73000000	27000000	69000000	19000000		Pf00350, Pf01926, Pf08477	0.896	15.5723
Eif2s3x	IsMasterProteinCandidate	26905	High	A2AAW9	Eukaryotic translation initiation factor 2 subunit 3, X-linked OS=Mus musculus GN=Eif2s3x PE=1 SV=1	13.6923	8.43023	2	15	0	344	0	1	1	0	0	0	29000000	7200000	22000000	NA	23000000	NA	17000000	9800000	18000000	7100000	31000000	6300000		Pf00009, Pf03144	0.54	18.1833
Eif2s3x	IsMasterProteinCandidate	26905	High	Q3UIJ2	Putative uncharacterized protein OS=Mus musculus GN=Eif2s3x PE=2 SV=1	13.6923	6.14407	2	15	0	472	0	1	1	0	0	0	29000000	7200000	22000000	NA	23000000	NA	17000000	9800000	18000000	7100000	31000000	6300000		Pf00009, Pf03144, Pf09173	0.389	18.1833
Eif2s3x	IsMasterProteinCandidate	26905	High	Q3UDF8	Putative uncharacterized protein OS=Mus musculus GN=Eif2s3x PE=2 SV=1	13.6923	6.4877	2	15	0	447	0	1	1	0	0	0	29000000	7200000	22000000	NA	23000000	NA	17000000	9800000	18000000	7100000	31000000	6300000		Pf00009, Pf03144, Pf09173	0.438	18.1833
Eif2s3x	IsMasterProtein	26905	High	Q3TML6	Eukaryotic translation initiation factor 2, subunit 3, structural gene X-linked OS=Mus musculus GN=Eif2s3x PE=2 SV=1	13.6923	6.14407	2	15	0	472	0	1	1	0	0	0	29000000	7200000	22000000	NA	23000000	NA	17000000	9800000	18000000	7100000	31000000	6300000		Pf00009, Pf03144, Pf09173	0.389	18.1833
Eif2s3x	None	26905	High	Q9CRE9	Putative uncharacterized protein (Fragment) OS=Mus musculus GN=Eif2s3x PE=2 SV=1	4.5558	3.51351	1	10	0.000200361	370	0	1	1	0	0	0	29000000	7200000	22000000	NA	23000000	NA	26000000	9800000	33000000	7100000	39000000	6300000		Pf00009, Pf03144, Pf09173	0.179	6.72562
Eif2s3x	None	26905	High	Q3U5H6	Putative uncharacterized protein (Fragment) OS=Mus musculus GN=Eif2s3x PE=2 SV=1	4.5558	3.93939	1	10	0.000200361	330	0	1	1	0	0	0	29000000	7200000	22000000	NA	23000000	NA	26000000	9800000	33000000	7100000	39000000	6300000		Pf00009, Pf03144, Pf09173	0.194	6.72562
Eif2s3y	IsMasterProteinCandidate	26908	High	Q9D791	Putative uncharacterized protein OS=Mus musculus GN=Eif2s3y PE=2 SV=1	13.6923	6.14407	2	15	0	472	0	1	1	0	0	0	29000000	7200000	22000000	NA	23000000	NA	17000000	9800000	18000000	7100000	31000000	6300000		Pf00009, Pf03144, Pf09173	0.389	18.1833
Eif2s3y	IsMasterProteinCandidate	26908	High	Q9Z0N2	Eukaryotic translation initiation factor 2 subunit 3, Y-linked OS=Mus musculus GN=Eif2s3y PE=2 SV=2	13.6923	6.14407	2	15	0	472	0	1	1	0	0	0	29000000	7200000	22000000	NA	23000000	NA	17000000	9800000	18000000	7100000	31000000	6300000		Pf00009, Pf03144, Pf09173	0.389	18.1833
Eif2s3y	None	26908	High	Q9CZT2	Eukaryotic translation initiation factor 2, subunit 3, structural gene Y-linked, isoform CRA_b OS=Mus musculus GN=Eif2s3y PE=2 SV=1	4.5558	12.8713	1	10	0.000200361	101	0	1	1	0	0	0	29000000	7200000	22000000	NA	23000000	NA	26000000	9800000	33000000	7100000	39000000	6300000		Pf00009	0.585	6.72562
Eif4a2	None	13682	High	E9Q561	Eukaryotic initiation factor 4A-II OS=Mus musculus GN=Eif4a2 PE=3 SV=1	18.1423	12.1795	3	56	0	312	1	0	1	0	0	0	40000000	NA	NA	NA	36000000	NA	NA	NA	NA	NA	NA	NA		Pf00270, Pf00271	0.931	115.071
Eif4a2	IsMasterProteinCandidate	13682	High	Q8BTU6	Eukaryotic initiation factor 4A-II OS=Mus musculus GN=Eif4a2 PE=2 SV=1	37.3791	18.7845	5	95	0	362	1	0	1	0	0	0	40000000	NA	NA	NA	36000000	NA	NA	NA	NA	NA	NA	NA		Pf00270, Pf00271, Pf04851	1.581	210.012
Eif4a2	IsMasterProtein	13682	High	Q52KC1	Eukaryotic translation initiation factor 4A2 OS=Mus musculus GN=Eif4a2 PE=2 SV=1	37.3791	16.7076	5	95	0	407	1	0	1	0	0	0	40000000	NA	NA	NA	36000000	NA	NA	NA	NA	NA	NA	NA		Pf00270, Pf00271, Pf04851	1.448	210.012
Eif5	None	217869	High	Q05CM5	Eif5 protein (Fragment) OS=Mus musculus GN=Eif5 PE=2 SV=1	5.98233	8.36653	2	11	0.000200361	251	0	1	1	0	0	0	28000000	19000000	34000000	NA	30000000	NA	NA	NA	32000000	15000000	44000000	16000000		Pf01873	0.179	7.36056
Eif5	None	217869	High	Q8BVV6	Putative uncharacterized protein OS=Mus musculus GN=Eif5 PE=2 SV=1	5.98233	5.6	2	11	0.000200361	375	0	1	1	0	0	0	28000000	19000000	34000000	NA	30000000	NA	NA	NA	32000000	15000000	44000000	16000000		Pf01873, Pf02020	0.129	7.36056
Eml1	IsMasterProteinCandidate	68519	High	D3Z4J9	Echinoderm microtubule-associated protein-like 1 OS=Mus musculus GN=Eml1 PE=4 SV=1	23.6781	7.625	5	53	0	800	1	1	1	0	0	0	110000000	NA	43000000	NA	36000000	NA	200000000	56000000	180000000	52000000	160000000	5000000		Pf00400, Pf03451	0.425	53.2339
Eml1	IsMasterProteinCandidate	68519	High	B9EKL9	Eml1 protein OS=Mus musculus GN=Eml1 PE=2 SV=1	23.6781	7.61548	5	53	0	801	1	1	1	0	0	0	110000000	NA	43000000	NA	36000000	NA	200000000	56000000	180000000	52000000	160000000	5000000		Pf00400, Pf03451	0.453	53.2339
Eml1	IsMasterProtein	68519	High	Q05BC3	Echinoderm microtubule-associated protein-like 1 OS=Mus musculus GN=Eml1 PE=1 SV=1	23.6781	7.49386	5	53	0	814	1	1	1	0	0	0	110000000	NA	43000000	NA	36000000	NA	200000000	56000000	180000000	52000000	160000000	5000000		Pf00400, Pf03451	0.453	53.2339
Etfb	IsMasterProtein	110826	High	Q9DCW4	Electron transfer flavoprotein subunit beta OS=Mus musculus GN=Etfb PE=1 SV=3	6.33444	8.62745	2	13	0.000200361	255	1	0	1	0	0	0	20000000	NA	NA	NA	26000000	NA	17000000	27000000	19000000	24000000	42000000	44000000		Pf01012	0.425	3.57423
Fblim1	IsMasterProtein	74202	High	Q71FD7	Filamin-binding LIM protein 1 OS=Mus musculus GN=Fblim1 PE=1 SV=2	6.94756	5.6	2	12	0	375	1	1	1	1	0	0	8100000	NA	19000000	NA	10000000	NA	8000000	NA	11000000	3500000	33000000	11000000		Pf00412	0.311	17.5381
Fblim1	None	74202	High	A2ADE6	Filamin-binding LIM protein 1 (Fragment) OS=Mus musculus GN=Fblim1 PE=4 SV=1	4.80465	7.42857	1	9	0.000200361	175	1	1	1	1	0	0	8100000	NA	11000000	NA	3500000	NA	8000000	NA	11000000	3500000	17000000	11000000			0.468	13.7475
Fblim1	None	74202	High	A2ADE8	Filamin-binding LIM protein 1 (Fragment) OS=Mus musculus GN=Fblim1 PE=4 SV=1	4.80465	12.7451	1	9	0.000200361	102	1	1	1	1	0	0	8100000	NA	11000000	NA	3500000	NA	8000000	NA	11000000	3500000	17000000	11000000			0.468	13.7475
Fblim1	None	74202	High	A2ADF3	Filamin-binding LIM protein 1 (Fragment) OS=Mus musculus GN=Fblim1 PE=4 SV=1	4.80465	23.2143	1	9	0.000200361	56	1	1	1	1	0	0	8100000	NA	11000000	NA	3500000	NA	8000000	NA	11000000	3500000	17000000	11000000			0.585	13.7475
Fblim1	None	74202	High	A2ADE7	Filamin-binding LIM protein 1 (Fragment) OS=Mus musculus GN=Fblim1 PE=4 SV=1	4.80465	7.14286	1	9	0.000200361	182	1	1	1	1	0	0	8100000	NA	11000000	NA	3500000	NA	8000000	NA	11000000	3500000	17000000	11000000			0.468	13.7475
Fblim1	None	74202	High	A2ADF2	Filamin-binding LIM protein 1 (Fragment) OS=Mus musculus GN=Fblim1 PE=4 SV=1	4.80465	17.8082	1	9	0.000200361	73	1	1	1	1	0	0	8100000	NA	11000000	NA	3500000	NA	8000000	NA	11000000	3500000	17000000	11000000			0.389	13.7475
Fblim1	None	74202	High	A2ADE9	Filamin-binding LIM protein 1 (Fragment) OS=Mus musculus GN=Fblim1 PE=4 SV=1	4.80465	10.1562	1	9	0.000200361	128	1	1	1	1	0	0	8100000	NA	11000000	NA	3500000	NA	8000000	NA	11000000	3500000	17000000	11000000			0.389	13.7475
Fblim1	None	74202	High	A2ADE5	Filamin-binding LIM protein 1 (Fragment) OS=Mus musculus GN=Fblim1 PE=4 SV=1	4.80465	7.78443	1	9	0.000200361	167	1	1	1	1	0	0	8100000	NA	11000000	NA	3500000	NA	8000000	NA	11000000	3500000	17000000	11000000			0.468	13.7475
Fermt2	None	218952	High	A6X940	Fermitin family homolog 2 (Fragment) OS=Mus musculus GN=Fermt2 PE=4 SV=1	30.9626	18.9922	5	38	0	258	1	0	1	0	0	0	160000000	NA	80000000	25000000	250000000	NA	180000000	110000000	310000000	110000000	360000000	94000000			4.623	34.8703
Flna	None	192176	High	Q9JJ37	Filamin (Fragment) OS=Mus musculus GN=Flna PE=2 SV=1	10.2102	32.3077	2	53	0	65	0	1	1	0	0	0	2400000000	46000000	890000000	NA	1300000000	NA	1700000000	460000000	3200000000	490000000	3800000000	290000000		Pf00630	2.981	42.5953
Flnb	None	286940	High	Q3T9V9	Putative uncharacterized protein (Fragment) OS=Mus musculus GN=Flnb PE=2 SV=1	10.9932	7.34463	2	9	0	354	1	0	1	0	0	0	17000000	NA	NA	NA	NA	NA	34000000	14000000	NA	NA	44000000	32000000		Pf00630, Pf13954	0.54	18.1905
Gars	IsMasterProtein	353172	High	Q9CZD3	Glycine--tRNA ligase OS=Mus musculus GN=Gars PE=1 SV=1	14.1094	7.13306	4	24	0	729	1	0	1	0	0	0	16000000	NA	3000000	1700000	14000000	NA	13000000	15000000	19000000	13000000	29000000	7200000		Pf00458, Pf00587, Pf03129	0.245	48.9663
Gnai2	IsMasterProtein	14678	High	P08752	Guanine nucleotide-binding protein G(i) subunit alpha-2 OS=Mus musculus GN=Gnai2 PE=1 SV=5	11.3203	10.9859	3	13	0	355	1	1	1	1	0	0	7900000	NA	5900000	NA	12000000	NA	13000000	NA	18000000	3800000	16000000	4600000		Pf00025, Pf00503	0.292	31.4127
Gsn	None	227753	High	A6PWS5	Gelsolin (Fragment) OS=Mus musculus GN=Gsn PE=4 SV=1	12.4644	10.3586	2	35	0	251	1	1	1	0	0	0	190000000	NA	89000000	NA	2700000	NA	170000000	180000000	450000000	110000000	420000000	62000000		Pf00626	1.683	51.4461
Gsn	None	227753	High	Q3UCW8	Putative uncharacterized protein OS=Mus musculus GN=Gsn PE=2 SV=1	25.1459	8.07114	4	55	0	731	0	1	1	0	0	0	130000000	96000000	83000000	NA	35000000	NA	220000000	150000000	390000000	78000000	320000000	53000000		Pf00626	0.557	109.216
Hdlbp	None	110611	High	A0PJE9	Hdlbp protein (Fragment) OS=Mus musculus GN=Hdlbp PE=2 SV=1	12.5119	14.6283	4	5	0	417	0	1	1	0	-1	0	NA	NA	86000000	NA	38000000	NA	NA	NA	NA	9700000	NA	NA		Pf00013, Pf13014	0.468	9.46181
Hmgcl	IsMasterProtein	15356	High	P38060	Hydroxymethylglutaryl-CoA lyase, mitochondrial OS=Mus musculus GN=Hmgcl PE=1 SV=2	5.15889	4.30769	1	5	0.000200361	325	1	0	1	-1	0	0	14000000	NA	NA	NA	9500000	NA	NA	13000000	NA	NA	21000000	16000000		Pf00682	0.166	6.47471
Hmgcl	IsMasterProteinCandidate	15356	High	Q3UMP2	Putative uncharacterized protein OS=Mus musculus GN=Hmgcl PE=2 SV=1	5.15889	4.30769	1	5	0.000200361	325	1	0	1	-1	0	0	14000000	NA	NA	NA	9500000	NA	NA	13000000	NA	NA	21000000	16000000		Pf00682	0.166	6.47471
Hspa2	IsMasterProtein	15512	High	B7U582	Heat shock protein 70-2 OS=Mus musculus PE=3 SV=1	93.6541	22.5908	13	222	0	633	0	1	1	0	0	0	100000000	9100000	82000000	NA	52000000	NA	77000000	53000000	150000000	31000000	120000000	15000000		Pf00012, Pf06723	3.146	389.197
Hspa2	IsMasterProteinCandidate	15512	High	P17156	Heat shock-related 70 kDa protein 2 OS=Mus musculus GN=Hspa2 PE=1 SV=2	93.6541	22.5908	13	222	0	633	0	1	1	0	0	0	100000000	9100000	82000000	NA	52000000	NA	77000000	53000000	150000000	31000000	120000000	15000000		Pf00012, Pf06723	3.146	389.197
Igf2bp2	IsMasterProtein	319765	High	Q5SF07	Insulin-like growth factor 2 mRNA-binding protein 2 OS=Mus musculus GN=Igf2bp2 PE=1 SV=1	5.83919	4.56081	2	9	0.000200361	592	1	0	1	-1	-1	-1	7600000	NA	NA	NA	17000000	NA	NA	6400000	NA	4300000	NA	3000000		Pf00013, Pf00076, Pf13014, Pf13893, Pf14259	0.16	19.9445
Igf2bp2	IsMasterProteinCandidate	319765	High	A6X8Z3	Insulin-like growth factor 2 mRNA-binding protein 2 OS=Mus musculus GN=Igf2bp2 PE=1 SV=1	5.83919	5.15267	2	9	0.000200361	524	1	0	1	-1	-1	-1	7600000	NA	NA	NA	17000000	NA	NA	6400000	NA	4300000	NA	3000000		Pf00013, Pf00076, Pf13014, Pf13893, Pf14259	0.202	19.9445
Ighg	IsMasterProteinCandidate	380794	High	Q91Z05	Ighg protein OS=Mus musculus GN=Ighg PE=1 SV=1	10.6979	6.76533	2	11	0	473	1	0	1	0	0	0	56000000	NA	NA	NA	82000000	NA	27000000	43000000	NA	NA	67000000	29000000		Pf07654, Pf07686, Pf08205	0.778	25.6795
Ighg	IsMasterProteinCandidate	380794	High	Q8R3H6	Ighg protein OS=Mus musculus GN=Ighg PE=2 SV=1	10.6979	6.75105	2	11	0	474	1	0	1	0	0	0	56000000	NA	NA	NA	82000000	NA	27000000	43000000	NA	NA	67000000	29000000		Pf07654, Pf07686, Pf08205	0.778	25.6795
Ighg	IsMasterProtein	380794	High	Q569X1	Ighg protein OS=Mus musculus GN=Ighg PE=1 SV=1	10.6979	6.72269	2	11	0	476	1	0	1	0	0	0	56000000	NA	NA	NA	82000000	NA	27000000	43000000	NA	NA	67000000	29000000		Pf07654, Pf08205	1.154	25.6795
Ipo5	None	70572	High	Q7TN23	Ipo5 protein (Fragment) OS=Mus musculus GN=Ipo5 PE=2 SV=1	17.0108	7.01754	4	13	0	798	0	1	1	0	0	0	64000000	18000000	35000000	NA	25000000	NA	71000000	23000000	100000000	20000000	70000000	13000000		Pf02985, Pf12755, Pf13513, Pf13646	0.304	33.2083
Ipo5	None	70572	High	Q3TT04	Putative uncharacterized protein OS=Mus musculus GN=Ipo5 PE=2 SV=1	19.8	7.92683	5	22	0	820	0	1	1	0	0	0	41000000	10000000	35000000	NA	16000000	NA	42000000	23000000	60000000	16000000	53000000	13000000		Pf13513	0.359	33.2083
Ipo5	IsMasterProtein	70572	High	Q8BKC5	Importin-5 OS=Mus musculus GN=Ipo5 PE=1 SV=3	32.3688	8.75114	7	33	0	1097	0	1	1	0	0	0	31000000	7500000	35000000	NA	13000000	NA	33000000	13000000	47000000	16000000	67000000	9400000		Pf02985, Pf12755, Pf13513, Pf13646	0.512	60.4426
Iqgap1	None	29875	High	Q8BPA6	Putative uncharacterized protein (Fragment) OS=Mus musculus GN=Iqgap1 PE=2 SV=1	13.2885	5.16987	3	13	0	677	1	0	1	0	-1	0	63000000	NA	92000000	55000000	69000000	NA	60000000	40000000	NA	37000000	67000000	51000000		Pf00616, Pf03836	0.225	13.4509
Iqgap1	None	29875	High	Q8CC64	Putative uncharacterized protein (Fragment) OS=Mus musculus GN=Iqgap1 PE=2 SV=1	10.3659	15.1163	2	12	0	172	1	0	1	0	-1	0	63000000	NA	92000000	55000000	69000000	NA	60000000	40000000	NA	37000000	78000000	51000000		Pf03836	1.512	13.4509
Itih2	IsMasterProteinCandidate	16425	High	Q61703	Inter-alpha-trypsin inhibitor heavy chain H2 OS=Mus musculus GN=Itih2 PE=1 SV=1	20.5378	4.22833	4	29	0	946	1	1	1	0	0	0	19000000	NA	18000000	NA	5700000	NA	5200000	3800000	15000000	3700000	13000000	2300000		Pf00092, Pf06668, Pf08487, Pf10138, Pf13519, Pf13768	0.377	56.4248
Itih2	IsMasterProteinCandidate	16425	High	Q8K016	Inter-alpha trypsin inhibitor, heavy chain 2 OS=Mus musculus GN=Itih2 PE=2 SV=1	20.5378	4.22833	4	29	0	946	1	1	1	0	0	0	19000000	NA	18000000	NA	5700000	NA	5200000	3800000	15000000	3700000	13000000	2300000		Pf00092, Pf06668, Pf08487, Pf10138, Pf13519, Pf13768	0.377	56.4248
Itih2	IsMasterProtein	16425	High	G3X977	Inter-alpha trypsin inhibitor, heavy chain 2 OS=Mus musculus GN=Itih2 PE=4 SV=1	20.5378	4.21053	4	29	0	950	1	1	1	0	0	0	19000000	NA	18000000	NA	5700000	NA	5200000	3800000	15000000	3700000	13000000	2300000		Pf00092, Pf06668, Pf08487, Pf10138, Pf13519, Pf13768	0.377	56.4248
Itih2	None	16425	High	Q3UEG7	Inter-alpha-trypsin inhibitor heavy chain H2 (Fragment) OS=Mus musculus GN=Itih2 PE=2 SV=1	6.43359	2.87611	1	9	0.000200361	452	1	0	1	0	0	0	7200000	NA	NA	NA	NA	NA	3700000	3800000	4600000	3700000	6600000	2300000		Pf00092, Pf08487, Pf13519, Pf13768	0.292	12.1774
Itpr1	IsMasterProtein	16438	High	P11881	Inositol 1,4,5-trisphosphate receptor type 1 OS=Mus musculus GN=Itpr1 PE=1 SV=2	3.13781	0.327392	1	2	0.0058784	2749	1	1	0	0	0	0	19000000	NA	11000000	NA	NA	NA	NA	NA	NA	NA	NA	NA		Pf00520, Pf01365, Pf02815, Pf08454, Pf08709	0.018	0
Itpr2	IsMasterProteinCandidate	16439	High	Q9Z329	Inositol 1,4,5-trisphosphate receptor type 2 OS=Mus musculus GN=Itpr2 PE=1 SV=4	3.13781	0.33321	1	2	0.0058784	2701	1	1	0	0	0	0	19000000	NA	11000000	NA	NA	NA	NA	NA	NA	NA	NA	NA		Pf01365, Pf02815, Pf08454, Pf08709, Pf12670	0.019	0
Itpr3	IsMasterProteinCandidate	16440	High	Q0IJ80	Itpr3 protein (Fragment) OS=Mus musculus GN=Itpr3 PE=2 SV=1	3.13781	0.996678	1	2	0.0058784	903	1	1	0	0	0	0	19000000	NA	11000000	NA	NA	NA	NA	NA	NA	NA	NA	NA		Pf00520, Pf01027, Pf08454	0.062	0
Itpr3	IsMasterProteinCandidate	16440	High	P70227	Inositol 1,4,5-trisphosphate receptor type 3 OS=Mus musculus GN=Itpr3 PE=1 SV=3	3.13781	0.337079	1	2	0.0058784	2670	1	1	0	0	0	0	19000000	NA	11000000	NA	NA	NA	NA	NA	NA	NA	NA	NA		Pf00520, Pf01027, Pf01365, Pf02815, Pf08454, Pf08709	0.02	0
Kank1	None	107351	High	Q8BUK3	Putative uncharacterized protein (Fragment) OS=Mus musculus GN=Kank1 PE=2 SV=1	15.1985	5.41401	1	22	0	314	1	0	1	0	0	0	28000000	NA	9600000	13000000	1100000	NA	220000000	4000000	74000000	4200000	83000000	30000000		Pf00023, Pf12796, Pf13606, Pf13637, Pf13857	0.468	61.4685
Kank1	None	107351	High	Q80U69	MKIAA0172 protein (Fragment) OS=Mus musculus GN=mKIAA0172 PE=4 SV=2	15.1985	1.82013	1	22	0	934	1	0	1	0	0	0	28000000	NA	9600000	13000000	1100000	NA	220000000	4000000	74000000	4200000	83000000	30000000		Pf00023, Pf12796, Pf13606, Pf13637, Pf13857	0.129	61.4685
Kank1	None	107351	High	E9Q238	Protein Kank1 OS=Mus musculus GN=Kank1 PE=4 SV=1	15.1985	1.25	1	22	0	1360	1	0	1	0	0	0	28000000	NA	9600000	13000000	1100000	NA	220000000	4000000	74000000	4200000	83000000	30000000		Pf00023, Pf12075, Pf12796, Pf13606, Pf13637, Pf13857	0.083	61.4685
Kank1	None	107351	High	Q6AXG6	Kank1 protein OS=Mus musculus GN=Kank1 PE=2 SV=1	15.1985	1.41431	1	22	0	1202	1	0	1	0	0	0	28000000	NA	9600000	13000000	1100000	NA	220000000	4000000	74000000	4200000	83000000	30000000		Pf00023, Pf12796, Pf13606, Pf13637, Pf13857	0.099	61.4685
Kank1	None	107351	High	Q810T9	Kank1 protein OS=Mus musculus GN=Kank1 PE=2 SV=1	15.1985	5.53746	1	22	0	307	1	0	1	0	0	0	28000000	NA	9600000	13000000	1100000	NA	220000000	4000000	74000000	4200000	83000000	30000000		Pf00023, Pf12796, Pf13606, Pf13637, Pf13857	0.468	61.4685
Kank1	None	107351	High	Q6PDJ3	Kank1 protein OS=Mus musculus GN=Kank1 PE=2 SV=1	15.1985	2.78232	1	22	0	611	1	0	1	0	0	0	28000000	NA	9600000	13000000	1100000	NA	220000000	4000000	74000000	4200000	83000000	30000000		Pf00023, Pf12796, Pf13606, Pf13637, Pf13857	0.245	61.4685
Kars	IsMasterProteinCandidate	85305	High	Q8CFK5	Lysine--tRNA ligase OS=Mus musculus GN=Kars PE=2 SV=1	8.19326	4.01929	2	7	0	622	1	1	1	0	0	0	37000000	NA	27000000	NA	NA	NA	12000000	11000000	NA	NA	34000000	7200000		Pf00152, Pf00587, Pf01336	0.179	17.9428
Kars	IsMasterProteinCandidate	85305	High	Q8C292	Lysine--tRNA ligase OS=Mus musculus GN=Kars PE=2 SV=1	8.19326	4.20168	2	7	0	595	1	1	1	0	0	0	37000000	NA	27000000	NA	NA	NA	12000000	11000000	NA	NA	34000000	7200000		Pf00152, Pf00587, Pf01336	0.194	17.9428
Kars	IsMasterProteinCandidate	85305	High	Q8C1V4	Lysine--tRNA ligase OS=Mus musculus GN=Kars PE=2 SV=1	8.19326	4.20168	2	7	0	595	1	1	1	0	0	0	37000000	NA	27000000	NA	NA	NA	12000000	11000000	NA	NA	34000000	7200000		Pf00152, Pf00587, Pf01336	0.194	17.9428
Kars	IsMasterProtein	85305	High	Q8R2P8	Lysine--tRNA ligase OS=Mus musculus GN=Kars PE=2 SV=1	8.19326	4.00641	2	7	0	624	1	1	1	0	0	0	37000000	NA	27000000	NA	NA	NA	12000000	11000000	NA	NA	34000000	7200000		Pf00152, Pf00587, Pf01336	0.179	17.9428
Kars	IsMasterProteinCandidate	85305	High	Q3TIV6	Lysine--tRNA ligase OS=Mus musculus GN=Kars PE=2 SV=1	8.19326	4.20168	2	7	0	595	1	1	1	0	0	0	37000000	NA	27000000	NA	NA	NA	12000000	11000000	NA	NA	34000000	7200000		Pf00152, Pf00587, Pf01336	0.194	17.9428
Lgals9	IsMasterProtein	16859	High	G3X9T7	Galectin OS=Mus musculus GN=Lgals9 PE=4 SV=1	7.32302	5.94901	2	7	0	353	1	1	1	-1	-1	0	42000000	NA	46000000	NA	36000000	NA	NA	28000000	NA	23000000	53000000	22000000		Pf00337	0.425	11.6593
Lgals9	IsMasterProteinCandidate	16859	High	O08573	Galectin-9 OS=Mus musculus GN=Lgals9 PE=1 SV=1	7.32302	5.94901	2	7	0	353	1	1	1	-1	-1	0	42000000	NA	46000000	NA	36000000	NA	NA	28000000	NA	23000000	53000000	22000000		Pf00337	0.425	11.6593
Lgals9	IsMasterProteinCandidate	16859	High	B1AQR8	Galectin OS=Mus musculus GN=Lgals9 PE=4 SV=1	7.32302	5.96591	2	7	0	352	1	1	1	-1	-1	0	42000000	NA	46000000	NA	36000000	NA	NA	28000000	NA	23000000	53000000	22000000		Pf00337	0.425	11.6593
Lima1	IsMasterProteinCandidate	65970	High	Q8CD09	Putative uncharacterized protein OS=Mus musculus GN=Lima1 PE=2 SV=1	16.871	6.23946	3	14	0	593	1	0	1	0	0	0	15000000	NA	NA	NA	NA	NA	8000000	7000000	12000000	5000000	9200000	20000000		Pf00412	0.322	18.5598
Lima1	IsMasterProteinCandidate	65970	High	Q9ERG0	LIM domain and actin-binding protein 1 OS=Mus musculus GN=Lima1 PE=1 SV=3	16.871	4.91368	3	14	0	753	1	0	1	0	0	0	15000000	NA	NA	NA	NA	NA	8000000	7000000	12000000	5000000	9200000	20000000		Pf00412	0.233	18.5598
Lima1	IsMasterProtein	65970	High	Q8C7S2	Putative uncharacterized protein OS=Mus musculus GN=Lima1 PE=2 SV=1	16.871	4.91368	3	14	0	753	1	0	1	0	0	0	15000000	NA	NA	NA	NA	NA	8000000	7000000	12000000	5000000	9200000	20000000		Pf00412	0.233	18.5598
Lima1	IsMasterProteinCandidate	65970	High	Q8C3R7	Putative uncharacterized protein OS=Mus musculus GN=Lima1 PE=2 SV=1	16.871	6.23946	3	14	0	593	1	0	1	0	0	0	15000000	NA	NA	NA	NA	NA	8000000	7000000	12000000	5000000	9200000	20000000		Pf00412	0.322	18.5598
Lima1	IsMasterProteinCandidate	65970	High	Q8BT15	Putative uncharacterized protein OS=Mus musculus GN=Lima1 PE=2 SV=1	16.871	6.23946	3	14	0	593	1	0	1	0	0	0	15000000	NA	NA	NA	NA	NA	8000000	7000000	12000000	5000000	9200000	20000000		Pf00412	0.322	18.5598
LOC100503296	IsMasterProteinCandidate		High	D3Z5M2	Protein Gm10110 OS=Mus musculus GN=Gm10110 PE=4 SV=1	25.9329	8.61789	4	39	0	615	1	1	1	0	0	0	34000000	NA	18000000	NA	29000000	NA	29000000	12000000	35000000	8100000	37000000	9100000		Pf00076, Pf00658, Pf13893, Pf14259	0.403	75.3832
Maob	IsMasterProtein	109731	High	Q8BW75	Amine oxidase [flavin-containing] B OS=Mus musculus GN=Maob PE=1 SV=4	7.33236	2.88462	1	11	0	520	0	1	1	0	0	0	150000000	25000000	64000000	NA	140000000	NA	110000000	42000000	130000000	32000000	200000000	41000000		Pf01593, Pf13450	0.101	23.0922
Mapre2	IsMasterProteinCandidate	212307	High	E9Q6X0	Microtubule-associated protein RP/EB family member 2 OS=Mus musculus GN=Mapre2 PE=1 SV=1	6.26623	4.92958	2	8	0.000200361	284	1	1	1	0	-1	-1	30000000	NA	18000000	NA	13000000	NA	38000000	9000000	NA	8100000	NA	6300000		Pf00307, Pf03271	0.425	15.9348
Mapre2	IsMasterProteinCandidate	212307	High	Q3TG90	Microtubule-associated protein RP/EB family member 2 OS=Mus musculus GN=Mapre2 PE=2 SV=1	6.26623	8.18713	2	8	0.000200361	171	1	1	1	0	-1	-1	30000000	NA	18000000	NA	13000000	NA	38000000	9000000	NA	8100000	NA	6300000		Pf00307	0.668	15.9348
Mapre2	IsMasterProtein	212307	High	Q8R001	Microtubule-associated protein RP/EB family member 2 OS=Mus musculus GN=Mapre2 PE=1 SV=1	6.26623	4.29448	2	8	0.000200361	326	1	1	1	0	-1	-1	30000000	NA	18000000	NA	13000000	NA	38000000	9000000	NA	8100000	NA	6300000		Pf00307, Pf03271	0.468	15.9348
Myh11	IsMasterProtein	17880	High	E9QPE7	Myosin-11 OS=Mus musculus GN=Myh11 PE=1 SV=1	1740.07	55.3664	149	14481	0	1938	1	1	1	0	0	0	400000000	NA	380000000	NA	36000000	NA	280000000	230000000	540000000	400000000	220000000	86000000	Acetyl [K917]	Pf00038, Pf00063, Pf01442, Pf01576, Pf02463, Pf02736, Pf04111, Pf04156, Pf07111, Pf07888, Pf09726, Pf09731, Pf10079, Pf12128, Pf12252, Pf13166	863.842	33891.3
Myof	IsMasterProtein	226101	High	B9EK95	Myof protein OS=Mus musculus GN=Myof PE=2 SV=1	20.462	1.4556	2	16	0	2061	1	0	1	0	0	0	37000000	NA	46000000	15000000	4700000	NA	13000000	7100000	7300000	NA	9500000	4400000		Pf00168, Pf08150, Pf08151, Pf08165	0.062	42.3094
Myof	IsMasterProteinCandidate	226101	High	Q69ZN7	Myoferlin OS=Mus musculus GN=Myof PE=1 SV=2	20.462	1.46484	2	16	0	2048	1	0	1	0	0	0	37000000	NA	46000000	15000000	4700000	NA	13000000	7100000	7300000	NA	9500000	4400000		Pf00168, Pf08150, Pf08151, Pf08165	0.062	42.3094
Myzap	IsMasterProteinCandidate	102371	High	Q3UIJ9	Myocardial zonula adherens protein OS=Mus musculus GN=Myzap PE=1 SV=1	4.58303	2.14592	1	11	0.000200361	466	1	1	1	0	0	1	99000000	NA	33000000	NA	29000000	NA	31000000	6500000	36000000	6800000	41000000	NA		Pf01576, Pf04111, Pf09731, Pf13166, Pf15328	0.08	22.7118
Nap1l1	IsMasterProteinCandidate	53605	High	Q8BSH9	Nucleosome assembly protein 1-like 1, isoform CRA_b OS=Mus musculus GN=Nap1l1 PE=2 SV=1	8.67934	9.92167	3	15	0	383	1	1	0	0	0	0	52000000	NA	32000000	NA	NA	NA	50000000	19000000	33000000	19000000	51000000	12000000		Pf00956	2.162	6.35861
Nap1l1	IsMasterProteinCandidate	53605	High	P28656	Nucleosome assembly protein 1-like 1 OS=Mus musculus GN=Nap1l1 PE=1 SV=2	8.67934	9.71867	3	15	0	391	1	1	0	0	0	0	52000000	NA	32000000	NA	NA	NA	50000000	19000000	33000000	19000000	51000000	12000000		Pf00956	1.683	6.35861
Nap1l1	IsMasterProtein	53605	High	E9PW66	Nucleosome assembly protein 1-like 1 OS=Mus musculus GN=Nap1l1 PE=1 SV=1	8.67934	9.09091	3	15	0	418	1	1	0	0	0	0	52000000	NA	32000000	NA	NA	NA	50000000	19000000	33000000	19000000	51000000	12000000		Pf00956	1.683	6.35861
Nap1l1	IsMasterProteinCandidate	53605	High	Q3TF41	Nucleosome assembly protein 1-like 1, isoform CRA_d OS=Mus musculus GN=Nap1l1 PE=2 SV=1	8.67934	10.3261	3	15	0	368	1	1	0	0	0	0	52000000	NA	32000000	NA	NA	NA	50000000	19000000	33000000	19000000	51000000	12000000		Pf00956	2.162	6.35861
Nap1l1	None	53605	High	Q9CSP8	Putative uncharacterized protein (Fragment) OS=Mus musculus GN=Nap1l1 PE=2 SV=1	2.99439	3.81944	1	10	0.00825627	288	1	1	0	0	0	0	52000000	NA	32000000	NA	NA	NA	50000000	19000000	49000000	19000000	51000000	12000000		Pf00956	1.154	0
Napg	IsMasterProteinCandidate	108123	High	Q9CWZ7	Gamma-soluble NSF attachment protein OS=Mus musculus GN=Napg PE=1 SV=1	3.85699	3.52564	1	4	0.00054338	312	1	1	1	0	0	1	19000000	NA	12000000	NA	5200000	NA	NA	NA	NA	NA	16000000	NA		Pf14938	0.155	0
Napg	IsMasterProteinCandidate	108123	High	Q8C1T5	Putative uncharacterized protein OS=Mus musculus GN=Napg PE=2 SV=1	3.85699	3.52564	1	4	0.00054338	312	1	1	1	0	0	1	19000000	NA	12000000	NA	5200000	NA	NA	NA	NA	NA	16000000	NA		Pf14938	0.155	0
Ndufa6	IsMasterProtein	67130	High	Q9CQZ5	NADH dehydrogenase [ubiquinone] 1 alpha subcomplex subunit 6 OS=Mus musculus GN=Ndufa6 PE=1 SV=1	3.66434	12.9771	1	6	0.00054338	131	1	0	1	-1	0	0	6800000	NA	NA	NA	NA	NA	NA	3200000	NA	NA	7400000	9600000		Pf05347, Pf13232, Pf13233	0.292	14.4653
Nhlrc2	IsMasterProteinCandidate	66866	High	B2RR26	NHL repeat containing 2 OS=Mus musculus GN=Nhlrc2 PE=2 SV=1	4.72862	1.7931	1	3	0.000200361	725	1	0	1	-1	0	0	17000000	NA	NA	NA	13000000	NA	NA	9800000	NA	NA	NA	NA		Pf00578, Pf01436, Pf13905	0.105	6.81057
Nhlrc2	IsMasterProteinCandidate	66866	High	Q8C1S8	Putative uncharacterized protein OS=Mus musculus GN=Nhlrc2 PE=2 SV=1	4.72862	2.86344	1	3	0.000200361	454	1	0	1	-1	0	0	17000000	NA	NA	NA	13000000	NA	NA	9800000	NA	NA	NA	NA		Pf01436	0.212	6.81057
Nhlrc2	IsMasterProtein	66866	High	Q9CW64	Putative uncharacterized protein (Fragment) OS=Mus musculus GN=Nhlrc2 PE=2 SV=1	4.72862	1.73797	1	3	0.000200361	748	1	0	1	-1	0	0	17000000	NA	NA	NA	13000000	NA	NA	9800000	NA	NA	NA	NA		Pf00578, Pf01436, Pf13905	0.105	6.81057
Npm1	IsMasterProteinCandidate	18148	High	Q5SQB7	MCG68069 OS=Mus musculus GN=Npm1 PE=2 SV=1	11.2533	4.79452	1	13	0	292	0	1	1	0	0	0	34000000	12000000	7600000	NA	21000000	NA	35000000	8300000	32000000	3900000	28000000	5500000		Pf03066	0.425	42.4154
Npm1	IsMasterProteinCandidate	18148	High	Q5SQB0	Nucleophosmin OS=Mus musculus GN=Npm1 PE=1 SV=1	11.2533	5.30303	1	13	0	264	0	1	1	0	0	0	34000000	12000000	7600000	NA	21000000	NA	35000000	8300000	32000000	3900000	28000000	5500000		Pf03066	0.52	42.4154
Npm1	IsMasterProteinCandidate	18148	High	Q5U438	Nucleophosmin 1 OS=Mus musculus GN=Npm1 PE=2 SV=1	11.2533	4.79452	1	13	0	292	0	1	1	0	0	0	34000000	12000000	7600000	NA	21000000	NA	35000000	8300000	32000000	3900000	28000000	5500000		Pf03066	0.425	42.4154
Npm1	IsMasterProtein	18148	High	Q3U536	Putative uncharacterized protein OS=Mus musculus GN=Npm1 PE=2 SV=1	11.2533	4.79452	1	13	0	292	0	1	1	0	0	0	34000000	12000000	7600000	NA	21000000	NA	35000000	8300000	32000000	3900000	28000000	5500000		Pf03066	0.425	42.4154
Pabpc4	IsMasterProteinCandidate	230721	High	Q99LF8	Poly(A) binding protein, cytoplasmic 4 OS=Mus musculus GN=Pabpc4 PE=2 SV=1	25.9329	8.0303	4	39	0	660	1	1	1	0	0	0	34000000	NA	18000000	NA	29000000	NA	29000000	12000000	35000000	8100000	37000000	9100000		Pf00076, Pf00658, Pf13893, Pf14259	0.377	75.3832
Pabpc4	IsMasterProteinCandidate	230721	High	Q91YZ8	Poly(A) binding protein, cytoplasmic 4 OS=Mus musculus GN=Pabpc4 PE=2 SV=1	25.9329	8.61789	4	39	0	615	1	1	1	0	0	0	34000000	NA	18000000	NA	29000000	NA	29000000	12000000	35000000	8100000	37000000	9100000		Pf00076, Pf00658, Pf13893, Pf14259	0.403	75.3832
Pabpc4	IsMasterProteinCandidate	230721	High	A3KFU5	Protein Pabpc4 OS=Mus musculus GN=Pabpc4 PE=4 SV=1	25.9329	8.39937	4	39	0	631	1	1	1	0	0	0	34000000	NA	18000000	NA	29000000	NA	29000000	12000000	35000000	8100000	37000000	9100000		Pf00076, Pf00658, Pf13893, Pf14259	0.377	75.3832
Pabpc4	None	230721	High	Q3UX16	Putative uncharacterized protein OS=Mus musculus GN=Pabpc4 PE=2 SV=1	17.1892	6.10169	3	18	0	590	1	1	1	0	0	0	34000000	NA	18000000	NA	29000000	NA	29000000	12000000	35000000	8100000	37000000	9100000		Pf00076, Pf00658, Pf13893, Pf14259	0.311	6.21691
Pabpc4	IsMasterProteinCandidate	230721	High	A3KFU8	Protein Pabpc4 OS=Mus musculus GN=Pabpc4 PE=4 SV=1	25.9329	8.22981	4	39	0	644	1	1	1	0	0	0	34000000	NA	18000000	NA	29000000	NA	29000000	12000000	35000000	8100000	37000000	9100000		Pf00076, Pf00658, Pf13893, Pf14259	0.403	75.3832
Pabpc4	IsMasterProtein	230721	High	Q6PHQ9	MCG5546, isoform CRA_c OS=Mus musculus GN=Pabpc4 PE=2 SV=1	25.9329	8.0303	4	39	0	660	1	1	1	0	0	0	34000000	NA	18000000	NA	29000000	NA	29000000	12000000	35000000	8100000	37000000	9100000		Pf00076, Pf00658, Pf13893, Pf14259	0.377	75.3832
Pcm1	IsMasterProteinCandidate	18536	High	Q9R0L6	Pericentriolar material 1 protein OS=Mus musculus GN=Pcm1 PE=1 SV=2	12.2115	0.641975	1	20	0	2025	1	0	1	0	-1	0	14000000	NA	5900000	5600000	6200000	NA	860000	8500000	NA	6500000	8300000	5500000			0.089	33.4998
Pcm1	IsMasterProtein	18536	High	B2RSW8	Pericentriolar material 1 OS=Mus musculus GN=Pcm1 PE=2 SV=1	12.2115	0.641975	1	20	0	2025	1	0	1	0	-1	0	14000000	NA	5900000	5600000	6200000	NA	860000	8500000	NA	6500000	8300000	5500000			0.089	33.4998
Pdcd6ip	None	18571	High	Q6ZPS9	MKIAA1375 protein (Fragment) OS=Mus musculus GN=Pdcd6ip PE=2 SV=1	34.3182	10.5611	7	29	0	909	0	1	1	0	0	0	86000000	7900000	33000000	NA	55000000	NA	58000000	48000000	83000000	71000000	110000000	30000000		Pf03097, Pf08391, Pf13949	0.468	59.6834
Pdcd6ip	IsMasterProtein	18571	High	Q80Y09	Pdcd6ip protein OS=Mus musculus GN=Pdcd6ip PE=2 SV=1	38.8132	12.5	8	30	0	872	0	1	1	0	0	0	86000000	7900000	33000000	NA	55000000	NA	81000000	48000000	83000000	71000000	110000000	30000000		Pf03097, Pf08391, Pf13949	0.585	61.7097
Pdcd6ip	IsMasterProteinCandidate	18571	High	Q9WU78	Programmed cell death 6-interacting protein OS=Mus musculus GN=Pdcd6ip PE=1 SV=3	38.8132	12.5432	8	30	0	869	0	1	1	0	0	0	86000000	7900000	33000000	NA	55000000	NA	81000000	48000000	83000000	71000000	110000000	30000000		Pf03097, Pf08391, Pf13949	0.585	61.7097
Pdlim7	None	67399	High	B8JJB1	PDZ and LIM domain protein 7 (Fragment) OS=Mus musculus GN=Pdlim7 PE=4 SV=1	26.7053	55.1724	4	63	0	58	0	1	1	0	0	0	670000000	25000000	220000000	NA	300000000	NA	660000000	150000000	1000000000	270000000	1000000000	98000000		Pf00595	16.783	90.6688
Pebp1	IsMasterProteinCandidate	23980	High	Q5EBQ2	MCG7941, isoform CRA_f OS=Mus musculus GN=Pebp1 PE=2 SV=1	13.0084	6.95187	1	19	0	187	1	0	1	0	0	0	5700000	NA	5600000	11000000	2600000	NA	67000000	4200000	6100000	3100000	44000000	7200000		Pf01161	4.623	23.4412
Pebp1	IsMasterProteinCandidate	23980	High	Q3TGC5	Putative uncharacterized protein OS=Mus musculus GN=Pebp1 PE=2 SV=1	13.0084	6.95187	1	19	0	187	1	0	1	0	0	0	5700000	NA	5600000	11000000	2600000	NA	67000000	4200000	6100000	3100000	44000000	7200000		Pf01161	4.623	23.4412
Pfkp	None	56421	High	Q9D255	Putative uncharacterized protein OS=Mus musculus GN=Pfkp PE=2 SV=1	22.9086	13.4831	2	32	0	267	1	0	1	0	0	0	32000000	NA	NA	NA	55000000	NA	95000000	44000000	150000000	50000000	130000000	35000000		Pf00365	0.874	77.3334
Pgls	IsMasterProtein	66171	High	Q9CQ60	6-phosphogluconolactonase OS=Mus musculus GN=Pgls PE=2 SV=1	6.0248	6.22568	1	11	0.000200361	257	1	1	1	0	0	0	6900000	NA	2400000	NA	5100000	NA	13000000	2300000	13000000	3600000	11000000	3600000		Pf01182	0.259	31.4133
Pgls	IsMasterProteinCandidate	66171	High	Q8CBG6	6-phosphogluconolactonase OS=Mus musculus GN=Pgls PE=2 SV=1	6.0248	7.44186	1	11	0.000200361	215	1	1	1	0	0	0	6900000	NA	2400000	NA	5100000	NA	13000000	2300000	13000000	3600000	11000000	3600000		Pf01182	0.389	31.4133
Pgm2	None	72157	High	Q99JW6	Pgm2 protein (Fragment) OS=Mus musculus GN=Pgm2 PE=2 SV=1	12.5263	20.4545	1	17	0	88	1	1	1	0	0	0	6700000	NA	6500000	NA	5200000	NA	18000000	7500000	20000000	8500000	26000000	4900000		Pf00408	0.931	50.1392
Plcl1	IsMasterProteinCandidate	227120	High	Q3USB7	Inactive phospholipase C-like protein 1 OS=Mus musculus GN=Plcl1 PE=1 SV=3	3.21268	1.00365	1	4	0.0058784	1096	1	1	1	0	0	1	4200000	NA	3000000	NA	1000000	NA	NA	NA	NA	NA	3300000	NA		Pf00168, Pf00169, Pf00387, Pf00388, Pf09279	0.049	7.03737
Plcl2	IsMasterProtein	224860	High	Q8K394	Inactive phospholipase C-like protein 2 OS=Mus musculus GN=Plcl2 PE=1 SV=2	3.21268	0.975177	1	4	0.0058784	1128	1	1	1	0	0	1	4200000	NA	3000000	NA	1000000	NA	NA	NA	NA	NA	3300000	NA		Pf00168, Pf00169, Pf00387, Pf00388, Pf09279, Pf12814	0.053	7.03737
Ppp1r12a	None	17931	High	Q3TS88	Putative uncharacterized protein (Fragment) OS=Mus musculus GN=Ppp1r12a PE=2 SV=1	24.357	10.917	4	62	0	458	0	1	1	0	0	0	430000000	19000000	230000000	NA	230000000	NA	500000000	200000000	490000000	200000000	310000000	110000000			0.688	120.867
Ppp1r12b	None	329251	High	A6H644	Protein phosphatase 1 regulatory subunit 12 OS=Mus musculus GN=Ppp1r12b PE=2 SV=1	35.5302	6.65323	6	89	0	992	1	1	1	0	0	0	320000000	NA	220000000	NA	190000000	NA	490000000	170000000	280000000	160000000	310000000	68000000		Pf00023, Pf12796, Pf13606, Pf13637, Pf13857	0.389	193.845
Ppp1r12b	IsMasterProtein	329251	High	Q8BG95	Protein phosphatase 1 regulatory subunit 12B OS=Mus musculus GN=Ppp1r12b PE=1 SV=2	39.9125	8.29918	7	90	0	976	1	1	1	0	0	0	320000000	NA	220000000	NA	190000000	NA	490000000	170000000	280000000	160000000	310000000	68000000		Pf00023, Pf12796, Pf13606, Pf13637, Pf13857	0.48	197.723
Prdx2	None	21672	High	Q5M9N9	Prdx2 protein OS=Mus musculus GN=Prdx2 PE=2 SV=1	11.7591	9.59596	2	10	0	198	1	1	1	0	-1	-1	46000000	NA	46000000	NA	37000000	NA	8400000	37000000	NA	13000000	NA	22000000		Pf00578, Pf08534, Pf10417	1.371	26.3102
Prkar1a	IsMasterProteinCandidate	19084	High	Q8C3Z4	Putative uncharacterized protein OS=Mus musculus GN=Prkar1a PE=2 SV=1	9.31057	7.19603	2	19	0	403	1	1	1	0	0	0	63000000	NA	3000000	NA	19000000	NA	64000000	20000000	52000000	30000000	64000000	18000000		Pf00027, Pf02197, Pf02309	0.292	43.0479
Prkar1a	IsMasterProtein	19084	High	Q3TYK4	Putative uncharacterized protein OS=Mus musculus GN=Prkar1a PE=2 SV=1	9.31057	5.68627	2	19	0	510	1	1	1	0	0	0	63000000	NA	3000000	NA	19000000	NA	64000000	20000000	52000000	30000000	64000000	18000000		Pf00027, Pf02197	0.245	43.0479
Prkar1a	IsMasterProteinCandidate	19084	High	Q9CS50	Putative uncharacterized protein OS=Mus musculus GN=Prkar1a PE=2 SV=2	9.31057	11.284	2	19	0	257	1	1	1	0	0	0	63000000	NA	3000000	NA	19000000	NA	64000000	20000000	52000000	30000000	64000000	18000000		Pf00027	0.52	43.0479
Prkar1a	IsMasterProteinCandidate	19084	High	Q3UBA7	Putative uncharacterized protein OS=Mus musculus GN=Prkar1a PE=2 SV=1	9.31057	11.284	2	19	0	257	1	1	1	0	0	0	63000000	NA	3000000	NA	19000000	NA	64000000	20000000	52000000	30000000	64000000	18000000		Pf00027	0.52	43.0479
Prkar1a	IsMasterProteinCandidate	19084	High	Q9DBC7	cAMP-dependent protein kinase type I-alpha regulatory subunit OS=Mus musculus GN=Prkar1a PE=1 SV=3	9.31057	7.61155	2	19	0	381	1	1	1	0	0	0	63000000	NA	3000000	NA	19000000	NA	64000000	20000000	52000000	30000000	64000000	18000000		Pf00027, Pf02197	0.311	43.0479
Prkca	None	18750	High	P20444	Protein kinase C alpha type OS=Mus musculus GN=Prkca PE=1 SV=3	11.9926	5.65476	3	23	0	672	0	1	1	0	0	0	14000000	4200000	14000000	NA	7800000	NA	19000000	6100000	21000000	9600000	20000000	6900000		Pf00069, Pf00130, Pf00168, Pf00433, Pf07714	0.25	47.1198
Prkca	IsMasterProtein	18750	High	Q4VA93	Protein kinase C OS=Mus musculus GN=Prkca PE=2 SV=1	15.4139	8.03571	4	25	0	672	0	1	1	0	0	0	29000000	4200000	14000000	NA	7800000	NA	19000000	6100000	40000000	9600000	20000000	6900000		Pf00069, Pf00130, Pf00168, Pf00433, Pf07714	0.346	51.5941
Prkcb	None	18751	High	P68404	Protein kinase C beta type OS=Mus musculus GN=Prkcb PE=1 SV=4	7.81908	4.17288	2	14	0	671	0	1	1	0	0	0	37000000	4200000	14000000	NA	18000000	NA	41000000	10000000	56000000	9600000	45000000	6900000		Pf00069, Pf00130, Pf00168, Pf00433, Pf07714	0.15	23.3106
Psmd2	None	21762	High	Q99JX8	Psmd2 protein (Fragment) OS=Mus musculus GN=Psmd2 PE=2 SV=1	5.20642	7.28155	1	6	0.000200361	206	1	1	1	0	0	-1	35000000	NA	22000000	NA	49000000	NA	29000000	22000000	NA	NA	NA	25000000			0.259	6.30845
Psmd2	None	21762	High	Q9CRK7	Putative uncharacterized protein (Fragment) OS=Mus musculus GN=Psmd2 PE=2 SV=1	5.20642	12.7119	1	6	0.000200361	118	1	1	1	0	0	-1	35000000	NA	22000000	NA	49000000	NA	29000000	22000000	NA	NA	NA	25000000			0.585	6.30845
Psme2	None	19188	High	Q99LN3	Psme2 protein (Fragment) OS=Mus musculus GN=Psme2 PE=2 SV=1	5.29175	25	1	4	0.000200361	64	1	1	1	0	0	1	4000000	NA	14000000	NA	15000000	NA	NA	NA	NA	NA	3800000	NA		Pf02252	0.468	4.8232
Ptpn11	IsMasterProtein	19247	High	P35235	Tyrosine-protein phosphatase non-receptor type 11 OS=Mus musculus GN=Ptpn11 PE=1 SV=2	16.1195	7.03518	3	14	0	597	1	1	1	0	0	1	8500000	NA	3400000	NA	6900000	NA	8300000	5100000	10000000	1800000	7000000	NA		Pf00017, Pf00102, Pf00782	0.218	32.9701
Ptrh2	IsMasterProtein	217057	High	Q8R2Y8	Peptidyl-tRNA hydrolase 2, mitochondrial OS=Mus musculus GN=Ptrh2 PE=2 SV=1	7.2786	8.28729	1	12	0	181	0	1	1	0	0	0	22000000	5600000	12000000	NA	8200000	NA	14000000	3900000	11000000	3100000	14000000	3700000		Pf01981	0.292	42.7388
Rab2a	IsMasterProteinCandidate	59021	High	Q6PDZ3	RAB2A, member RAS oncogene family OS=Mus musculus GN=Rab2a PE=2 SV=1	6.68489	12.7358	2	5	0	212	1	0	1	-1	0	-1	36000000	NA	NA	NA	11000000	NA	NA	6400000	NA	NA	NA	21000000		Pf00025, Pf00071, Pf01926, Pf04670, Pf08477	0.359	12.4847
Rab2a	IsMasterProteinCandidate	59021	High	Q8BXY4	Putative uncharacterized protein OS=Mus musculus GN=Rab2a PE=2 SV=1	6.68489	16.0714	2	5	0	168	1	0	1	-1	0	-1	36000000	NA	NA	NA	11000000	NA	NA	6400000	NA	NA	NA	21000000		Pf00009, Pf00025, Pf00071, Pf01926, Pf04670, Pf08477	0.425	12.4847
Rab2a	IsMasterProtein	59021	High	Q0PD65	RAB2, member RAS oncogene family OS=Mus musculus GN=Rab2a PE=2 SV=1	6.68489	12.7358	2	5	0	212	1	0	1	-1	0	-1	36000000	NA	NA	NA	11000000	NA	NA	6400000	NA	NA	NA	21000000		Pf00009, Pf00025, Pf00071, Pf01926, Pf04670, Pf08477	0.389	12.4847
Ranbp1	IsMasterProteinCandidate	19385	High	Q3U6M5	Putative uncharacterized protein OS=Mus musculus GN=Ranbp1 PE=2 SV=1	7.65943	6.40394	2	11	0	203	1	1	1	-1	0	0	36000000	NA	45000000	NA	32000000	NA	NA	32000000	NA	NA	79000000	29000000		Pf00638	0.389	17.2336
Ranbp1	IsMasterProtein	19385	High	P34022	Ran-specific GTPase-activating protein OS=Mus musculus GN=Ranbp1 PE=1 SV=2	7.65943	6.40394	2	11	0	203	1	1	1	-1	0	0	36000000	NA	45000000	NA	32000000	NA	NA	32000000	NA	NA	79000000	29000000		Pf00638	0.389	17.2336
Rbm3	IsMasterProtein	19652	High	Q8BG13	Putative RNA-binding protein 3 OS=Mus musculus GN=Rbm3 PE=2 SV=1	4.91686	11.6883	1	4	0.000200361	154	1	0	1	-1	0	-1	58000000	NA	NA	NA	47000000	NA	NA	27000000	NA	NA	NA	23000000		Pf00076, Pf13893, Pf14259	0.292	11.5103
Rbm3	IsMasterProteinCandidate	19652	High	O89086	RNA-binding protein 3 OS=Mus musculus GN=Rbm3 PE=2 SV=1	4.91686	11.7647	1	4	0.000200361	153	1	0	1	-1	0	-1	58000000	NA	NA	NA	47000000	NA	NA	27000000	NA	NA	NA	23000000		Pf00076, Pf13893, Pf14259	0.292	11.5103
Rbm3	IsMasterProteinCandidate	19652	High	Q5RJV3	Rbm3 protein OS=Mus musculus GN=Rbm3 PE=2 SV=1	4.91686	14.0625	1	4	0.000200361	128	1	0	1	-1	0	-1	58000000	NA	NA	NA	47000000	NA	NA	27000000	NA	NA	NA	23000000		Pf00076, Pf13893, Pf14259	0.389	11.5103
Rbpms	IsMasterProteinCandidate	19663	High	T1ECW4	RNA-binding protein with multiple-splicing OS=Mus musculus GN=Rbpms PE=4 SV=1	4.43039	7.32984	1	7	0.000200361	191	1	0	1	0	0	0	40000000	NA	NA	NA	18000000	NA	NA	NA	42000000	9000000	3200000	7000000		Pf00076, Pf13893, Pf14259	0.233	0
Rbpms	IsMasterProteinCandidate	19663	High	Q8C586	Putative uncharacterized protein OS=Mus musculus GN=Rbpms PE=2 SV=1	4.43039	8.23529	1	7	0.000200361	170	1	0	1	0	0	0	40000000	NA	NA	NA	18000000	NA	NA	NA	42000000	9000000	3200000	7000000		Pf00076, Pf13893, Pf14259	0.212	0
Rbpms	IsMasterProtein	19663	High	Q9WVB0	RNA-binding protein with multiple splicing OS=Mus musculus GN=Rbpms PE=2 SV=2	4.43039	7.1066	1	7	0.000200361	197	1	0	1	0	0	0	40000000	NA	NA	NA	18000000	NA	NA	NA	42000000	9000000	3200000	7000000		Pf00076, Pf13893, Pf14259	0.259	0
Rdh11	IsMasterProteinCandidate	17252	High	Q9R1R8	Retinol dehydrogenase 11 OS=Mus musculus GN=Rdh11 PE=2 SV=1	7.95729	4.33333	1	7	0	300	1	0	1	-1	0	0	9500000	NA	NA	NA	2800000	NA	NA	6500000	17000000	4600000	25000000	3700000		Pf00106, Pf08659, Pf13460	0.311	2.23573
Rdh11	IsMasterProteinCandidate	17252	High	Q9R1R9	UBE-1a OS=Mus musculus GN=Rdh11 PE=2 SV=1	7.95729	4.43686	1	7	0	293	1	0	1	-1	0	0	9500000	NA	NA	NA	2800000	NA	NA	6500000	17000000	4600000	25000000	3700000		Pf00106, Pf08659, Pf13460	0.334	2.23573
Rdh11	IsMasterProtein	17252	High	Q9QYF1	Retinol dehydrogenase 11 OS=Mus musculus GN=Rdh11 PE=2 SV=2	7.95729	4.11392	1	7	0	316	1	0	1	-1	0	0	9500000	NA	NA	NA	2800000	NA	NA	6500000	17000000	4600000	25000000	3700000		Pf00106, Pf08659, Pf13460	0.334	2.23573
Rps23	None	66475	High	Q9CSN9	Putative uncharacterized protein (Fragment) OS=Mus musculus GN=Rps23 PE=2 SV=1	4.27387	8.27068	1	7	0.000389257	133	1	0	1	0	0	0	3500000	NA	2100000	1600000	1700000	NA	960000	51000000	NA	NA	NA	NA		Pf00164	0.931	13.3681
Rps26; Rps26-ps1	IsMasterProtein	27370; 100042812	High	P62855	40S ribosomal protein S26 OS=Mus musculus GN=Rps26 PE=2 SV=3	32.867	33.913	3	111	0	115	1	1	0	0	0	0	340000000	NA	280000000	NA	69000000	91000000	270000000	130000000	330000000	30000000	330000000	92000000		Pf01283	13.678	114.282
Rpsa	IsMasterProtein	16785	High	B2CY77	Laminin receptor (Fragment) OS=Mus musculus GN=Rpsa PE=2 SV=1	16.2354	15.2542	3	9	0	295	1	0	1	0	0	0	340000000	NA	170000000	91000000	290000000	NA	66000000	170000000	NA	NA	140000000	190000000		Pf00318	0.701	8.08636
Rpsa; LOC100045332; LOC100505031; LOC102642689	IsMasterProteinCandidate	16785; 100045332; 102642689	High	P14206	40S ribosomal protein SA OS=Mus musculus GN=Rpsa PE=1 SV=4	16.2354	15.2542	3	9	0	295	1	0	1	0	0	0	340000000	NA	170000000	91000000	290000000	NA	66000000	170000000	NA	NA	140000000	190000000		Pf00318	0.701	8.08636
Sbf1	IsMasterProtein	77980	High	Q6ZPE2	Myotubularin-related protein 5 OS=Mus musculus GN=Sbf1 PE=1 SV=2	10.1153	1.60686	2	7	0	1867	0	1	1	-1	-1	-1	NA	NA	63000000	NA	1500000	NA	NA	3300000	NA	2900000	NA	2900000		Pf00169, Pf02141, Pf03455, Pf03456, Pf06602, Pf08616, Pf12335, Pf14593, Pf15413	0.059	19.008
Sec23b	IsMasterProteinCandidate	27054	High	Q3TYS4	Putative uncharacterized protein OS=Mus musculus GN=Sec23b PE=2 SV=1	8.26745	2.08605	1	6	0	767	1	1	1	1	0	0	5000000	NA	5200000	NA	NA	NA	4900000	NA	NA	NA	7100000	2800000		Pf00626, Pf04810, Pf04811, Pf04815, Pf08033	0.086	24.3115
Sec23b	IsMasterProtein	27054	High	Q3TAW4	Putative uncharacterized protein OS=Mus musculus GN=Sec23b PE=2 SV=1	8.26745	2.08605	1	6	0	767	1	1	1	1	0	0	5000000	NA	5200000	NA	NA	NA	4900000	NA	NA	NA	7100000	2800000		Pf00626, Pf04810, Pf04811, Pf04815, Pf08033	0.086	24.3115
Sec23b	IsMasterProteinCandidate	27054	High	Q8CDS4	Putative uncharacterized protein OS=Mus musculus GN=Sec23b PE=2 SV=1	8.26745	2.60163	1	6	0	615	1	1	1	1	0	0	5000000	NA	5200000	NA	NA	NA	4900000	NA	NA	NA	7100000	2800000		Pf00626, Pf04811, Pf04815, Pf08033	0.105	24.3115
Sec23b	IsMasterProteinCandidate	27054	High	Q3TIS3	Putative uncharacterized protein OS=Mus musculus GN=Sec23b PE=2 SV=1	8.26745	2.08605	1	6	0	767	1	1	1	1	0	0	5000000	NA	5200000	NA	NA	NA	4900000	NA	NA	NA	7100000	2800000		Pf00626, Pf04810, Pf04811, Pf04815, Pf08033	0.086	24.3115
Sec23b	IsMasterProteinCandidate	27054	High	Q9D662	Protein transport protein Sec23B OS=Mus musculus GN=Sec23b PE=1 SV=1	8.26745	2.08605	1	6	0	767	1	1	1	1	0	0	5000000	NA	5200000	NA	NA	NA	4900000	NA	NA	NA	7100000	2800000		Pf00626, Pf04810, Pf04811, Pf04815, Pf08033	0.086	24.3115
Sec23b	IsMasterProteinCandidate	27054	High	Q3UKB4	Putative uncharacterized protein OS=Mus musculus GN=Sec23b PE=2 SV=1	8.26745	2.08605	1	6	0	767	1	1	1	1	0	0	5000000	NA	5200000	NA	NA	NA	4900000	NA	NA	NA	7100000	2800000		Pf00626, Pf04810, Pf04811, Pf04815, Pf08033	0.086	24.3115
Sec63	IsMasterProteinCandidate	140740	High	Q8K2U5	Sec63 protein (Fragment) OS=Mus musculus GN=Sec63 PE=2 SV=1	8.97003	4.65116	2	23	0	516	0	1	1	0	0	0	31000000	3800000	32000000	NA	27000000	NA	7600000	7900000	20000000	5600000	29000000	6300000		Pf02724, Pf02889, Pf04147	0.292	8.88455
Sec63	IsMasterProtein	140740	High	Q80YG4	SEC63 OS=Mus musculus GN=Sec63 PE=2 SV=1	8.97003	3.15789	2	23	0	760	0	1	1	0	0	0	31000000	3800000	32000000	NA	27000000	NA	7600000	7900000	20000000	5600000	29000000	6300000		Pf00226, Pf02724, Pf02889, Pf04147	0.225	8.88455
Sec63	IsMasterProteinCandidate	140740	High	Q8VHE0	Translocation protein SEC63 homolog OS=Mus musculus GN=Sec63 PE=2 SV=4	8.97003	3.15789	2	23	0	760	0	1	1	0	0	0	31000000	3800000	32000000	NA	27000000	NA	7600000	7900000	20000000	5600000	29000000	6300000		Pf00226, Pf02724, Pf02889, Pf04147	0.225	8.88455
Sept7	IsMasterProtein	235072	High	E9Q1G8	Septin-7 OS=Mus musculus GN=Sept7 PE=1 SV=2	17.1208	13.0435	4	11	0	437	1	1	1	0	0	-1	48000000	NA	15000000	NA	22000000	NA	88000000	25000000	47000000	26000000	NA	16000000		Pf00735, Pf01926, Pf05368	0.492	16.5819
Sept7	IsMasterProteinCandidate	235072	High	Q8C2A3	Putative uncharacterized protein OS=Mus musculus GN=Sept7 PE=2 SV=1	17.1208	13.6364	4	11	0	418	1	1	1	0	0	-1	48000000	NA	15000000	NA	22000000	NA	88000000	25000000	47000000	26000000	NA	16000000		Pf00735, Pf01926	0.551	16.5819
Sept7	None	235072	High	Q5DTS3	MKIAA4020 protein (Fragment) OS=Mus musculus GN=Sept7 PE=2 SV=1	14.3055	12.2762	3	6	0	391	0	1	1	0	-1	-1	NA	NA	8800000	NA	25000000	NA	88000000	25000000	NA	26000000	NA	18000000		Pf00735, Pf01926, Pf03193	0.501	14.8511
Sept7	IsMasterProteinCandidate	235072	High	Q3UNN1	Putative uncharacterized protein OS=Mus musculus GN=Sept7 PE=2 SV=1	17.1208	13.6364	4	11	0	418	1	1	1	0	0	-1	48000000	NA	15000000	NA	22000000	NA	88000000	25000000	47000000	26000000	NA	16000000		Pf00735, Pf01926, Pf04111	0.551	16.5819
Sept7	IsMasterProteinCandidate	235072	High	O55131	Septin-7 OS=Mus musculus GN=Sept7 PE=1 SV=1	17.1208	13.0734	4	11	0	436	1	1	1	0	0	-1	48000000	NA	15000000	NA	22000000	NA	88000000	25000000	47000000	26000000	NA	16000000		Pf00735, Pf01926, Pf05368	0.492	16.5819
Serbp1	None	66870	High	Q3UEI6	Putative uncharacterized protein OS=Mus musculus GN=Serbp1 PE=2 SV=1	5.96337	4.14508	1	5	0.000200361	386	1	0	1	0	0	0	1200000	NA	NA	NA	1200000	NA	NA	NA	NA	NA	NA	NA		Pf04774	0.129	14.5225
Serbp1	None	66870	High	Q3V274	Putative uncharacterized protein OS=Mus musculus GN=Serbp1 PE=2 SV=1	5.96337	4.14508	1	5	0.000200361	386	1	0	1	0	0	0	1200000	NA	NA	NA	1200000	NA	NA	NA	NA	NA	NA	NA		Pf04774	0.136	14.5225
Serbp1	None	66870	High	Q3UMP4	Putative uncharacterized protein OS=Mus musculus GN=Serbp1 PE=2 SV=1	5.96337	3.99002	1	5	0.000200361	401	1	0	1	0	0	0	1200000	NA	NA	NA	1200000	NA	NA	NA	NA	NA	NA	NA		Pf04774	0.122	14.5225
Serpinb1b	None	282663	High	Q8VHP7	Leukocyte elastase inhibitor B OS=Mus musculus GN=Serpinb1b PE=1 SV=1	3.0175	2.6178	1	8	0.00612786	382	1	0	1	0	0	-1	38000000	NA	20000000	12000000	21000000	NA	26000000	17000000	NA	NA	NA	12000000		Pf00079	0.145	10.0207
Serpinb9b	None	20706	High	Q3TJ69	Putative uncharacterized protein OS=Mus musculus GN=Serpinb9b PE=2 SV=1	3.0175	2.65252	1	8	0.00612786	377	1	0	1	0	0	-1	38000000	NA	20000000	12000000	21000000	NA	26000000	17000000	NA	NA	NA	12000000		Pf00079	0.11	10.0207
Serpinb9b	None	20706	High	Q6P217	Serine (Or cysteine) peptidase inhibitor, clade B, member 9b OS=Mus musculus GN=Serpinb9b PE=2 SV=1	3.0175	2.65252	1	8	0.00612786	377	1	0	1	0	0	-1	38000000	NA	20000000	12000000	21000000	NA	26000000	17000000	NA	NA	NA	12000000		Pf00079	0.11	10.0207
Serpinb9b	None	20706	High	Q9DAV6	Protein Serpinb9b OS=Mus musculus GN=Serpinb9b PE=2 SV=1	3.0175	2.65252	1	8	0.00612786	377	1	0	1	0	0	-1	38000000	NA	20000000	12000000	21000000	NA	26000000	17000000	NA	NA	NA	12000000		Pf00079	0.11	10.0207
Serpinb9c	None	20707	High	I7HJI5	Protein Serpinb9c OS=Mus musculus GN=Serpinb9c PE=3 SV=1	3.0175	2.58398	1	8	0.00612786	387	1	0	1	0	0	-1	38000000	NA	20000000	12000000	21000000	NA	26000000	17000000	NA	NA	NA	12000000		Pf00079	0.166	10.0207
Serpinb9c	None	20707	High	Q80WW4	Serpinb9c protein OS=Mus musculus GN=Serpinb9c PE=2 SV=1	3.0175	2.97619	1	8	0.00612786	336	1	0	1	0	0	-1	38000000	NA	20000000	12000000	21000000	NA	26000000	17000000	NA	NA	NA	12000000		Pf00079	0.166	10.0207
Serpinb9c	None	20707	High	Q9D6A7	Protein Serpinb9c OS=Mus musculus GN=Serpinb9c PE=2 SV=1	3.0175	2.78552	1	8	0.00612786	359	1	0	1	0	0	-1	38000000	NA	20000000	12000000	21000000	NA	26000000	17000000	NA	NA	NA	12000000		Pf00079	0.166	10.0207
Serpini2	None	67931	High	Q9JK88	Serpin I2 OS=Mus musculus GN=Serpini2 PE=2 SV=1	3.0175	2.46914	1	8	0.00612786	405	1	0	1	0	0	-1	38000000	NA	20000000	12000000	21000000	NA	26000000	17000000	NA	NA	NA	12000000		Pf00079	0.145	10.0207
Sestd1	IsMasterProtein	228071	High	Q80UK0	SEC14 domain and spectrin repeat-containing protein 1 OS=Mus musculus GN=Sestd1 PE=2 SV=1	4.9535	1.58046	1	19	0.000200361	696	0	1	1	0	0	0	9100000	1400000	5500000	NA	4900000	NA	6300000	2100000	9200000	2500000	11000000	2000000		Pf13716	0.083	47.9198
Smtn	None	29856	High	Q9D7A0	Putative uncharacterized protein OS=Mus musculus GN=Smtn PE=2 SV=1	16.9627	7.62332	3	42	0	446	1	1	1	0	0	1	19000000	NA	2300000	NA	1200000	NA	65000000	820000	10000000	2200000	7100000	NA		Pf00307, Pf11971, Pf12510	0.848	106.349
Snx6	IsMasterProtein	72183	High	Q6P8X1	Sorting nexin-6 OS=Mus musculus GN=Snx6 PE=1 SV=2	4.08794	2.70936	1	9	0.00054338	406	1	1	1	0	0	0	16000000	NA	16000000	NA	8600000	NA	16000000	8600000	16000000	6800000	26000000	6600000		Pf00787, Pf03114, Pf09325	0.101	11.3341
Sod1	IsMasterProtein	20655	High	P08228	Superoxide dismutase [Cu-Zn] OS=Mus musculus GN=Sod1 PE=1 SV=2	10.1137	8.44156	1	7	0	154	1	0	1	-1	-1	-1	16000000	NA	NA	NA	40000000	NA	NA	17000000	NA	12000000	NA	13000000		Pf00080	0.52	5.46616
Ssr4	IsMasterProteinCandidate	20832	High	Q9D6F7	Putative uncharacterized protein OS=Mus musculus GN=Ssr4 PE=2 SV=1	6.80143	5.81395	1	18	0	172	0	1	1	0	0	0	22000000	5600000	5700000	NA	86000000	NA	58000000	2200000	58000000	4600000	96000000	2800000		Pf05404	1.154	12.5503
Ssr4	IsMasterProtein	20832	High	Q9D8L3	Signal sequence receptor, delta OS=Mus musculus GN=Ssr4 PE=2 SV=1	6.80143	5.78035	1	18	0	173	0	1	1	0	0	0	22000000	5600000	5700000	NA	86000000	NA	58000000	2200000	58000000	4600000	96000000	2800000		Pf05404	1.154	12.5503
Ssr4	IsMasterProteinCandidate	20832	High	Q9DC94	Putative uncharacterized protein OS=Mus musculus GN=Ssr4 PE=2 SV=1	6.80143	5.78035	1	18	0	173	0	1	1	0	0	0	22000000	5600000	5700000	NA	86000000	NA	58000000	2200000	58000000	4600000	96000000	2800000		Pf05404	1.154	12.5503
Ssr4	IsMasterProteinCandidate	20832	High	Q62186	Translocon-associated protein subunit delta OS=Mus musculus GN=Ssr4 PE=2 SV=1	6.80143	5.81395	1	18	0	172	0	1	1	0	0	0	22000000	5600000	5700000	NA	86000000	NA	58000000	2200000	58000000	4600000	96000000	2800000		Pf05404	1.154	12.5503
Svil	None	225115	High	E3VVQ8	Supervillin muscle-specific isoform OS=Mus musculus GN=Svil PE=2 SV=1	45.2606	7.58777	10	46	0	1766	0	1	1	0	0	0	160000000	12000000	17000000	NA	29000000	NA	88000000	42000000	200000000	31000000	190000000	24000000		Pf00626, Pf02209	0.349	71.9682
Svil	IsMasterProteinCandidate	225115	High	Q8K4L2	Archvillin OS=Mus musculus GN=Svil PE=2 SV=1	61.8341	8.81339	13	65	0	2031	0	1	1	0	0	0	160000000	12000000	17000000	NA	40000000	NA	110000000	49000000	200000000	38000000	200000000	24000000		Pf00626	0.349	101.676
Svil	IsMasterProtein	225115	High	Q8K4L3	Supervillin OS=Mus musculus GN=Svil PE=1 SV=1	61.8341	8.24885	13	65	0	2170	0	1	1	0	0	0	160000000	12000000	17000000	NA	40000000	NA	110000000	49000000	200000000	38000000	200000000	24000000		Pf00626, Pf02209	0.353	101.676
Svil	None	225115	High	E9Q983	Supervillin OS=Mus musculus GN=Svil PE=1 SV=1	52.2256	8.60702	11	54	0	1766	0	1	1	0	0	0	160000000	12000000	17000000	NA	29000000	NA	94000000	42000000	200000000	31000000	190000000	24000000		Pf00626, Pf02209	0.389	88.154
Synm	None	233335	High	Q80XS8	Synm protein (Fragment) OS=Mus musculus GN=Synm PE=2 SV=1	32.1971	22.6804	4	147	0	291	1	1	1	0	0	0	260000000	NA	82000000	NA	110000000	NA	180000000	40000000	200000000	17000000	150000000	6000000			1.424	361.662
Synm	None	233335	High	Q3TSN2	Putative uncharacterized protein OS=Mus musculus GN=Synm PE=2 SV=1	18.7571	7.94393	2	22	0	428	1	0	1	0	0	-1	110000000	NA	NA	NA	15000000	NA	42000000	10000000	67000000	5000000	NA	6000000			0.54	54.512
Tagln3	None	56370	High	Q9D6K2	Transgelin OS=Mus musculus GN=Tagln3 PE=2 SV=1	4.45333	9.79021	1	9	0.000200361	143	1	1	1	0	0	0	110000000	NA	110000000	NA	130000000	NA	210000000	180000000	180000000	110000000	180000000	100000000		Pf00307, Pf00402	0.212	11.5577
Tagln3	None	56370	High	Q9R1Q8	Transgelin-3 OS=Mus musculus GN=Tagln3 PE=1 SV=1	4.45333	7.03518	1	9	0.000200361	199	1	1	1	0	0	0	110000000	NA	110000000	NA	130000000	NA	210000000	180000000	180000000	110000000	180000000	100000000		Pf00307, Pf00402	0.179	11.5577
Tenc1; Tns2	None	209039	High	Q8CGB6	Tensin-like C1 domain-containing phosphatase OS=Mus musculus GN=Tenc1 PE=1 SV=1	9.98083	1	2	11	0	1400	1	1	1	0	0	0	340000000	NA	210000000	NA	140000000	NA	460000000	120000000	520000000	150000000	360000000	120000000		Pf00017, Pf00130, Pf03154, Pf05109, Pf08416, Pf09770, Pf10409, Pf13388	0.042	18.1964
Tes	None	21753	High	P47226	Testin OS=Mus musculus GN=Tes PE=1 SV=1	11.7359	8.74704	3	17	0	423	1	0	1	0	0	0	27000000	NA	NA	NA	410000000	NA	24000000	180000000	31000000	310000000	1200000000	130000000		Pf00412, Pf06297	0.468	7.63414
Tln2	None	70549	High	Q68FD6	Tln2 protein OS=Mus musculus GN=Tln2 PE=2 SV=1	42.5201	7.09859	9	66	0	1775	1	0	1	0	0	0	26000000	NA	26000000	8300000	16000000	NA	11000000	15000000	19000000	20000000	39000000	17000000		Pf01608, Pf08913, Pf09141	0.25	76.3869
Tln2	IsMasterProtein	70549	High	B2RY15	Tln2 protein OS=Mus musculus GN=Tln2 PE=2 SV=1	59.7367	6.845	13	112	0	2542	1	0	1	0	0	0	26000000	NA	25000000	9600000	16000000	NA	11000000	15000000	19000000	25000000	39000000	20000000		Pf00373, Pf01608, Pf02174, Pf08913, Pf09141, Pf09379	0.271	121.78
Tln2	None	70549	High	Q9CS79	Putative uncharacterized protein (Fragment) OS=Mus musculus GN=Tln2 PE=2 SV=1	24.4598	13.3455	5	46	0	547	1	0	1	0	0	0	25000000	NA	22000000	7700000	16000000	NA	9900000	10000000	13000000	13000000	17000000	10000000		Pf01608	0.417	41.7888
Tln2	None	70549	High	Q6PB69	Tln2 protein (Fragment) OS=Mus musculus GN=Tln2 PE=2 SV=1	24.4598	13.7996	5	46	0	529	1	0	1	0	0	0	25000000	NA	22000000	7700000	16000000	NA	9900000	10000000	13000000	13000000	17000000	10000000		Pf01608	0.468	41.7888
Tln2	None	70549	High	Q8CHG4	MKIAA0320 protein (Fragment) OS=Mus musculus GN=Tln2 PE=2 SV=1	37.2519	7.61387	8	70	0	1471	1	0	1	0	0	0	25000000	NA	25000000	9600000	16000000	NA	9900000	14000000	13000000	23000000	46000000	20000000		Pf01608, Pf08913	0.283	70.0998
Tln2	None	70549	High	Q8CDM9	Putative uncharacterized protein OS=Mus musculus GN=Tln2 PE=2 SV=1	37.2519	7.7135	8	70	0	1452	1	0	1	0	0	0	25000000	NA	25000000	9600000	16000000	NA	9900000	14000000	13000000	23000000	46000000	20000000		Pf01608, Pf08913	0.292	70.0998
Tln2	IsMasterProteinCandidate	70549	High	E9PUM4	Talin-2 OS=Mus musculus GN=Tln2 PE=4 SV=1	59.7367	6.845	13	112	0	2542	1	0	1	0	0	0	26000000	NA	25000000	9600000	16000000	NA	11000000	15000000	19000000	25000000	39000000	20000000		Pf00373, Pf01608, Pf02174, Pf08913, Pf09141, Pf09379	0.271	121.78
Tmem214	IsMasterProtein	68796	High	Q8BM55	Transmembrane protein 214 OS=Mus musculus GN=Tmem214 PE=2 SV=1	4.68761	2.03785	1	2	0.000200361	687	1	1	0	0	0	0	38000000	NA	29000000	NA	NA	NA	NA	NA	NA	NA	NA	NA		Pf10151	0.077	2.04533
Tns1	None	21961	High	Q8C6V6	Putative uncharacterized protein OS=Mus musculus GN=Tns1 PE=2 SV=1	34.5817	29.2793	5	51	0	222	0	1	1	0	0	0	410000000	18000000	170000000	NA	220000000	NA	260000000	67000000	460000000	96000000	350000000	77000000			4.623	96.29
Tns3	None	319939	High	Q5SSZ5	Tensin-3 OS=Mus musculus GN=Tns3 PE=1 SV=1	9.98083	0.972222	2	11	0	1440	1	1	1	0	0	0	340000000	NA	210000000	NA	140000000	NA	460000000	120000000	520000000	150000000	360000000	120000000		Pf00017, Pf08416, Pf10409	0.059	18.1964
Tor1aip2	IsMasterProtein	240832	High	Q8BYU6	Torsin-1A-interacting protein 2 OS=Mus musculus GN=Tor1aip2 PE=1 SV=1	3.0446	2.39044	1	3	0.00612786	502	1	0	1	-1	0	0	9100000	NA	NA	NA	4700000	NA	NA	3900000	NA	NA	NA	NA		Pf05609	0.136	0
Tpm1	None	22003	High	Q8BSH3	Tropomyosin alpha-1 chain OS=Mus musculus GN=Tpm1 PE=2 SV=1	261.636	69.0141	30	913	0	284	1	1	1	0	0	0	31000000	NA	32000000	NA	21000000	NA	51000000	29000000	180000000	79000000	290000000	87000000		Pf00261, Pf12718	331.46	1807.05
Tpm1	None	22003	High	E9Q452	Tropomyosin alpha-1 chain OS=Mus musculus GN=Tpm1 PE=3 SV=1	252.548	65.1246	29	904	0	281	1	1	1	0	0	0	31000000	NA	32000000	NA	21000000	NA	51000000	29000000	110000000	62000000	130000000	69000000		Pf00261, Pf12718	271.134	1780.8
Tpm1	None	22003	High	E9Q454	Tropomyosin alpha-1 chain OS=Mus musculus GN=Tpm1 PE=3 SV=1	252.548	63.7631	29	904	0	287	1	1	1	0	0	0	31000000	NA	32000000	NA	21000000	NA	51000000	29000000	110000000	62000000	130000000	69000000		Pf00261, Pf12718	271.134	1780.8
Tpm1	None	22003	High	E9Q450	Tropomyosin alpha-1 chain OS=Mus musculus GN=Tpm1 PE=3 SV=1	247.632	60.5634	27	894	0	284	1	1	1	0	0	0	31000000	NA	32000000	NA	21000000	NA	51000000	29000000	110000000	62000000	130000000	69000000		Pf00261, Pf12718	315.228	1766.75
Tpm1	IsMasterProtein	22003	High	Q564G1	Tropomyosin 1, alpha OS=Mus musculus GN=Tpm1 PE=2 SV=1	259.954	69.0141	30	915	0	284	1	1	1	0	0	0	31000000	NA	32000000	NA	21000000	NA	51000000	29000000	110000000	62000000	130000000	69000000		Pf00261, Pf12718	431.876	1805.66
Tpm1	None	22003	High	Q8BP43	Tropomyosin 1, alpha, isoform CRA_c OS=Mus musculus GN=Tpm1 PE=2 SV=1	252.422	66.1972	28	897	0	284	1	1	1	0	0	0	31000000	NA	32000000	NA	21000000	NA	51000000	29000000	250000000	86000000	410000000	92000000		Pf00261, Pf12718	271.134	1778.83
Tpm1	IsMasterProteinRejected	22003	High	Q545Y3	Tropomyosin 1, alpha, isoform CRA_l OS=Mus musculus GN=Tpm1 PE=2 SV=1	264.745	74.6479	31	918	0	284	1	1	1	0	0	0	31000000	NA	32000000	NA	21000000	NA	51000000	29000000	250000000	86000000	410000000	92000000		Pf00261, Pf12718	366.466	1817.74
Tpm1	None	22003	High	E9Q455	Tropomyosin alpha-1 chain OS=Mus musculus GN=Tpm1 PE=3 SV=1	184.021	57.7689	22	670	0	251	0	1	1	0	0	0	NA	NA	51000000	NA	36000000	NA	170000000	120000000	NA	NA	170000000	100000000		Pf00261, Pf12718	88.615	1252.2
Tpm1	None	22003	High	G5E8R2	Tropomyosin 1, alpha, isoform CRA_k OS=Mus musculus GN=Tpm1 PE=3 SV=1	179.105	54.0323	20	660	0	248	0	1	1	0	0	0	NA	NA	51000000	NA	36000000	NA	170000000	120000000	NA	NA	170000000	100000000		Pf00261, Pf12718	99	1238.15
Tpm1	None	22003	High	E9Q453	Tropomyosin alpha-1 chain OS=Mus musculus GN=Tpm1 PE=3 SV=1	171.699	49.3878	19	649	0	245	0	1	1	0	0	0	NA	NA	51000000	NA	36000000	NA	170000000	120000000	NA	NA	170000000	100000000		Pf00261, Pf12718	63.495	1213.29
Tpm1	IsMasterProteinRejected	22003	High	G5E8R1	Tropomyosin 1, alpha, isoform CRA_j OS=Mus musculus GN=Tpm1 PE=3 SV=1	191.428	63.7097	23	681	0	248	0	1	1	0	0	0	NA	NA	51000000	NA	36000000	NA	170000000	120000000	NA	NA	170000000	100000000		Pf00261, Pf12718	140.254	1277.07
Tpm1	None	22003	High	G5E8R0	Tropomyosin 1, alpha, isoform CRA_i OS=Mus musculus GN=Tpm1 PE=3 SV=1	184.021	59.1837	22	670	0	245	0	1	1	0	0	0	NA	NA	51000000	NA	36000000	NA	170000000	120000000	NA	NA	170000000	100000000		Pf00261, Pf12718	88.615	1252.2
Tubb3	IsMasterProteinRejected	22152	High	Q9ERD7	Tubulin beta-3 chain OS=Mus musculus GN=Tubb3 PE=1 SV=1	96.6195	32.2222	12	446	0	450	1	0	1	0	0	0	95000000	NA	NA	NA	49000000	NA	93000000	41000000	47000000	39000000	110000000	28000000		Pf00091, Pf03953, Pf10644	15.681	655.33
Tubb3	None	22152	High	Q9CRT0	Putative uncharacterized protein (Fragment) OS=Mus musculus GN=Tubb3 PE=2 SV=1	64.0779	35.3191	8	322	0	235	1	0	1	0	0	0	95000000	NA	NA	NA	49000000	NA	93000000	41000000	47000000	39000000	110000000	28000000		Pf03953	20.544	378.031
Tubb5	None	22154	High	Q80ZV2	Tubb5 protein (Fragment) OS=Mus musculus GN=Tubb5 PE=2 SV=1	92.4589	52.6882	9	414	0	186	1	0	1	0	0	0	50000000	NA	30000000	10000000	210000000	NA	340000000	130000000	420000000	11000000	790000000	8100000		Pf03953	62.096	658.624
Tubb6	None	67951	High	Q9CUN8	Putative uncharacterized protein (Fragment) OS=Mus musculus GN=Tubb6 PE=2 SV=1	73.5413	48.3412	9	266	0	211	1	0	1	0	0	0	180000000	NA	NA	NA	100000000	NA	160000000	37000000	170000000	39000000	100000000	28000000		Pf03953	16.013	341.815
Tubb6	None	67951	High	Q3U9U3	Putative uncharacterized protein OS=Mus musculus GN=Tubb6 PE=2 SV=1	90.1099	32	10	326	0	375	1	0	1	0	0	0	180000000	NA	NA	NA	100000000	NA	160000000	37000000	170000000	39000000	100000000	28000000		Pf00091, Pf03953	12.335	525.718
Tubb6	IsMasterProtein	67951	High	Q922F4	Tubulin beta-6 chain OS=Mus musculus GN=Tubb6 PE=1 SV=1	97.5344	31.9911	12	370	0	447	1	0	1	0	0	0	210000000	NA	120000000	45000000	120000000	NA	160000000	64000000	170000000	57000000	100000000	41000000		Pf00091, Pf03953, Pf10644	10.288	591.16
Usp14	IsMasterProteinCandidate	59025	High	E9PYI8	Ubiquitin carboxyl-terminal hydrolase OS=Mus musculus GN=Usp14 PE=1 SV=1	5.2609	3.93013	1	8	0.000200361	458	1	0	1	0	0	0	8600000	NA	4400000	1900000	2600000	NA	NA	NA	3000000	1300000	3900000	1200000		Pf00443, Pf13423	0.096	20.2358
Usp14	IsMasterProtein	59025	High	Q9JMA1	Ubiquitin carboxyl-terminal hydrolase 14 OS=Mus musculus GN=Usp14 PE=1 SV=3	5.2609	3.65112	1	8	0.000200361	493	1	0	1	0	0	0	8600000	NA	4400000	1900000	2600000	NA	NA	NA	3000000	1300000	3900000	1200000		Pf00443, Pf13423	0.096	20.2358
Usp14	IsMasterProteinCandidate	59025	High	Q3TC32	Putative uncharacterized protein OS=Mus musculus GN=Usp14 PE=2 SV=1	5.2609	7.53138	1	8	0.000200361	239	1	0	1	0	0	0	8600000	NA	4400000	1900000	2600000	NA	NA	NA	3000000	1300000	3900000	1200000		Pf00443, Pf13423	0.179	20.2358
Usp14	IsMasterProteinCandidate	59025	High	Q80UN0	Ubiquitin carboxyl-terminal hydrolase OS=Mus musculus GN=Usp14 PE=2 SV=1	5.2609	3.93013	1	8	0.000200361	458	1	0	1	0	0	0	8600000	NA	4400000	1900000	2600000	NA	NA	NA	3000000	1300000	3900000	1200000		Pf00443, Pf13423	0.096	20.2358
Usp15	None	14479	High	Q3TSV9	Putative uncharacterized protein (Fragment) OS=Mus musculus GN=Usp15 PE=2 SV=1	3.56083	3.92157	1	3	0.00178031	306	0	1	1	-1	0	0	NA	NA	3200000	NA	4400000	NA	NA	2300000	NA	NA	NA	NA		Pf00443, Pf13423	0.233	7.84343
Usp15	IsMasterProtein	14479	High	Q8R5H1	Ubiquitin carboxyl-terminal hydrolase 15 OS=Mus musculus GN=Usp15 PE=1 SV=1	8.72147	2.75229	2	6	0	981	1	1	1	0	0	1	6000000	NA	3200000	NA	4400000	NA	3700000	2300000	NA	NA	5000000	NA		Pf00443, Pf06337, Pf13423, Pf14533, Pf14836	0.105	10.2816
Vps26a	IsMasterProtein	30930	High	P40336	Vacuolar protein sorting-associated protein 26A OS=Mus musculus GN=Vps26a PE=1 SV=1	3.22871	3.97554	1	6	0.0058784	327	1	0	1	1	-1	-1	NA	NA	NA	NA	26000000	NA	3400000	NA	NA	7900000	NA	20000000		Pf03643	0.136	10.5699
Vps26a	IsMasterProteinCandidate	30930	High	Q6PE78	Vacuolar protein sorting 26 homolog A (Yeast), isoform CRA_e OS=Mus musculus GN=Vps26a PE=2 SV=1	3.22871	8.07453	1	6	0.0058784	161	1	0	1	1	-1	-1	NA	NA	NA	NA	26000000	NA	3400000	NA	NA	7900000	NA	20000000		Pf03643	0.212	10.5699
Wars	IsMasterProteinCandidate	22375	High	Q4FJZ4	Wars protein OS=Mus musculus GN=Wars PE=2 SV=1	15.7317	10.6029	3	19	0	481	0	1	1	0	0	0	88000000	31000000	60000000	NA	55000000	NA	56000000	41000000	53000000	33000000	77000000	26000000		Pf00458, Pf00579	0.304	25.7387
Wars	IsMasterProteinCandidate	22375	High	Q3UDG2	Putative uncharacterized protein OS=Mus musculus GN=Wars PE=2 SV=1	15.7317	10.7368	3	19	0	475	0	1	1	0	0	0	88000000	31000000	60000000	NA	55000000	NA	56000000	41000000	53000000	33000000	77000000	26000000		Pf00458, Pf00579	0.304	25.7387
Wars	IsMasterProteinCandidate	22375	High	Q3U6U7	Putative uncharacterized protein OS=Mus musculus GN=Wars PE=2 SV=1	15.7317	10.7368	3	19	0	475	0	1	1	0	0	0	88000000	31000000	60000000	NA	55000000	NA	56000000	41000000	53000000	33000000	77000000	26000000		Pf00458, Pf00579	0.304	25.7387
Wars	IsMasterProtein	22375	High	P32921	Tryptophan--tRNA ligase, cytoplasmic OS=Mus musculus GN=Wars PE=1 SV=2	15.7317	10.6029	3	19	0	481	0	1	1	0	0	0	88000000	31000000	60000000	NA	55000000	NA	56000000	41000000	53000000	33000000	77000000	26000000		Pf00458, Pf00579	0.304	25.7387
Zyx	None	22793	High	Q8CD55	Putative uncharacterized protein OS=Mus musculus GN=Zyx PE=2 SV=1	15.3236	8.26772	3	24	0	508	1	0	1	0	0	0	32000000	NA	220000000	24000000	230000000	NA	130000000	14000000	240000000	130000000	310000000	64000000		Pf00412	1.424	21.288

## Sheet: E 
Figure 5-source data 2E												0= not present in anti-HNF4a Ab (a445) or control IgG; 1= present in a445 but not IgG; -1 = present in IgG but not a445
All peptides that interact with HNF4a preferentially in a1HMZ colons in which there are 2 or more positives for a1HMZ compared to a7HMZ
												Mouse 1	Mouse 2	Mouse 3	Mouse 1	Mouse 2	Mouse 3
Sym	Master	GeneID	FDR	Acc	Desc	PEP.Score	Coverage (%)	Num.Peptides	Num.PSMs	Qval	AAs	a7HMZ.G67.a445	a7HMZ.G70.a445	a7HMZ.G72.a445	a1HMZ.G63.a445	a1HMZ.G77.a445	a1HMZ.G78.a445	Area.a7HMZ.G67.a445	Area.a7HMZ.G67.a445.IgG	Area.a7HMZ.G70.a445	Area.a7HMZ.G70.a445.IgG	Area.a7HMZ.G72.a445	Area.a7HMZ.G72.a445.IgG	Area.a1HMZ.G63.a445	Area.a1HMZ.G63.a445.IgG	Area.a1HMZ.G77.a445	Area.a1HMZ.G77.a445.IgG	Area.a1HMZ.G78.a445	Area.a1HMZ.G78.a445.IgG	Mods	Pfam	emPAI	Score.Sequest.HT
Akr1c19	IsMasterProteinCandidate	432720	High	Q5I0T6	Aldo-keto reductase family 1, member C19 OS=Mus musculus GN=Akr1c19 PE=2 SV=1	3.91686	4.95356	1	5	0.00054338	323	0	0	-1	1	1	0	NA	NA	NA	NA	NA	5300000	8500000	NA	7500000	NA	13000000	6300000		Pf00248	0.194	17.0988
Akr1c19	IsMasterProtein	432720	High	G3X9Y6	Aldo-keto reductase family 1, member C19 OS=Mus musculus GN=Akr1c19 PE=4 SV=1	3.91686	4.95356	1	5	0.00054338	323	0	0	-1	1	1	0	NA	NA	NA	NA	NA	5300000	8500000	NA	7500000	NA	13000000	6300000		Pf00248	0.194	17.0988
Akt1	IsMasterProteinCandidate	11651	High	Q8BS26	Putative uncharacterized protein OS=Mus musculus GN=Akt1 PE=2 SV=1	4.81559	3.76106	1	2	0.000200361	452	0	0	0	0	1	1	NA	NA	NA	NA	NA	NA	NA	NA	5900000	NA	12000000	NA		Pf00069, Pf00169, Pf07714, Pf14531, Pf15413	0.08	2.51532
Akt1	IsMasterProtein	11651	High	P31750	RAC-alpha serine/threonine-protein kinase OS=Mus musculus GN=Akt1 PE=1 SV=2	4.81559	3.54167	1	2	0.000200361	480	0	0	0	0	1	1	NA	NA	NA	NA	NA	NA	NA	NA	5900000	NA	12000000	NA		Pf00069, Pf00169, Pf00433, Pf07714, Pf14531, Pf15413	0.08	2.51532
Aldh1a2	IsMasterProtein	19378	High	Q62148	Retinal dehydrogenase 2 OS=Mus musculus GN=Aldh1a2 PE=2 SV=2	2.89449	1.9305	1	5	0.00994457	518	0	0	0	1	0	1	NA	NA	NA	NA	NA	NA	6200000	NA	4500000	1300000	4200000	NA		Pf00171, Pf05893	0.116	5.85199
Arpc1a	IsMasterProtein	56443	High	Q9R0Q6	Actin-related protein 2/3 complex subunit 1A OS=Mus musculus GN=Arpc1a PE=1 SV=1	10.0145	7.83784	2	4	0	370	0	0	0	1	1	1	NA	NA	NA	NA	NA	NA	13000000	NA	9200000	NA	15000000	NA		Pf00400	0.292	5.16913
Arpc1a	None	56443	High	Q9CTB9	Putative uncharacterized protein (Fragment) OS=Mus musculus PE=2 SV=3	3.17737	6.15385	1	2	0.0058784	195	0	0	0	0	1	1	NA	NA	NA	NA	NA	NA	NA	NA	9200000	NA	11000000	NA		Pf00400	0.233	0
Atp2a1	None	11937	High	Q62268	Fast skeletal muscle SR calcium ATPase OS=Mus musculus GN=Atp2a1 PE=2 SV=2	13.7238	19.7802	3	18	0	182	0	0	0	0	1	1	NA	NA	NA	NA	NA	NA	NA	NA	25000000	NA	110000000	NA		Pf00689	4.623	25.1602
Atp2a1	None	11937	High	Q3V1C4	Putative uncharacterized protein (Fragment) OS=Mus musculus GN=Atp2a1 PE=2 SV=1	27.0417	18.3746	4	43	0	283	0	0	0	0	1	1	NA	NA	NA	NA	NA	NA	NA	NA	25000000	NA	110000000	NA		Pf00689	9	72.314
Atp2a1	None	11937	High	Q3TUZ7	Putative uncharacterized protein (Fragment) OS=Mus musculus GN=Atp2a1 PE=2 SV=1	9.48611	17.8571	2	13	0	140	0	0	0	0	1	1	NA	NA	NA	NA	NA	NA	NA	NA	25000000	NA	110000000	NA		Pf00689	9	18.0522
Atp2a3	None	53313	High	Q8K3Y5	Sarcoendoplasmic reticulum Ca2+ ATPase type 3 SERCA3 (Fragment) OS=Mus musculus PE=4 SV=1	8.28811	35.8974	1	9	0	39	0	-1	0	1	1	0	86000000	45000000	NA	25000000	110000000	11000000	76000000	NA	62000000	NA	68000000	70000000		Pf00690	2.162	23.5663
Capn1	IsMasterProteinCandidate	12333	High	Q3UF24	Putative uncharacterized protein (Fragment) OS=Mus musculus GN=Capn1 PE=2 SV=1	11.0237	7.36648	3	4	0	543	0	0	0	1	1	1	NA	NA	NA	NA	NA	NA	7000000	NA	13000000	NA	25000000	NA		Pf00648, Pf01067, Pf13833	0.218	4.94397
Capn1	IsMasterProteinCandidate	12333	High	Q3TB79	Putative uncharacterized protein (Fragment) OS=Mus musculus GN=Capn1 PE=2 SV=1	11.0237	5.72246	3	4	0	699	0	0	0	1	1	1	NA	NA	NA	NA	NA	NA	7000000	NA	13000000	NA	25000000	NA		Pf00648, Pf01067, Pf13833	0.199	4.94397
Capn1	IsMasterProteinCandidate	12333	High	Q3UDG8	Putative uncharacterized protein OS=Mus musculus GN=Capn1 PE=2 SV=1	11.0237	5.6101	3	4	0	713	0	0	0	1	1	1	NA	NA	NA	NA	NA	NA	7000000	NA	13000000	NA	25000000	NA		Pf00648, Pf01067, Pf13833	0.194	4.94397
Capn1	IsMasterProteinCandidate	12333	High	Q8C2J1	Putative uncharacterized protein OS=Mus musculus GN=Capn1 PE=2 SV=1	11.0237	5.6101	3	4	0	713	0	0	0	1	1	1	NA	NA	NA	NA	NA	NA	7000000	NA	13000000	NA	25000000	NA		Pf00648, Pf01067, Pf13833	0.194	4.94397
Capn1	IsMasterProteinCandidate	12333	High	Q80Y25	Capn1 protein OS=Mus musculus GN=Capn1 PE=2 SV=1	11.0237	5.6101	3	4	0	713	0	0	0	1	1	1	NA	NA	NA	NA	NA	NA	7000000	NA	13000000	NA	25000000	NA		Pf00648, Pf01067, Pf13833	0.194	4.94397
Capn1	IsMasterProtein	12333	High	O35350	Calpain-1 catalytic subunit OS=Mus musculus GN=Capn1 PE=1 SV=1	11.0237	5.6101	3	4	0	713	0	0	0	1	1	1	NA	NA	NA	NA	NA	NA	7000000	NA	13000000	NA	25000000	NA		Pf00648, Pf01067, Pf13833	0.194	4.94397
Capzb	None	12345	High	F7CAZ6	F-actin-capping protein subunit beta (Fragment) OS=Mus musculus GN=Capzb PE=1 SV=1	6.96233	13.2353	2	2	0	204	0	0	0	1	1	0	NA	NA	NA	NA	NA	NA	38000000	NA	13000000	NA	NA	NA		Pf01115	0.233	4.26156
Casp1	IsMasterProtein	12362	High	P29452	Caspase-1 OS=Mus musculus GN=Casp1 PE=1 SV=1	6.87785	4.97512	2	6	0	402	0	0	0	1	1	0	29000000	22000000	NA	NA	NA	NA	24000000	NA	25000000	NA	39000000	26000000		Pf00619, Pf00656	0.245	0
Cdipt	IsMasterProtein	52858	High	Q8VDP6	CDP-diacylglycerol--inositol 3-phosphatidyltransferase OS=Mus musculus GN=Cdipt PE=1 SV=1	5.05562	6.10329	1	2	0.000200361	213	0	0	0	0	1	1	NA	NA	NA	NA	NA	NA	NA	NA	9500000	NA	3300000	NA		Pf01066	0.334	4.62965
Col6a3	IsMasterProtein	12835	High	O88493	Type VI collagen alpha 3 subunit OS=Mus musculus GN=Col6a3 PE=2 SV=1	356.676	22.4689	52	1982	0	2657	0	0	0	0	1	1	NA	NA	NA	NA	NA	NA	NA	NA	NA	NA	NA	NA		Pf00014, Pf00041, Pf00092, Pf01391, Pf11265, Pf13519	2.473	4368.08
Copb2	IsMasterProtein	50797	High	O55029	Coatomer subunit beta' OS=Mus musculus GN=Copb2 PE=2 SV=2	7.03869	3.20442	3	14	0	905	0	0	-1	1	1	0	100000000	35000000	73000000	66000000	NA	17000000	110000000	NA	110000000	NA	110000000	48000000		Pf00400, Pf04053	0.205	3.35721
Crnkl1	IsMasterProtein	66877	High	P63154	Crooked neck-like protein 1 OS=Mus musculus GN=Crnkl1 PE=1 SV=1	3.71354	1.88406	1	2	0.00054338	690	0	0	0	1	1	0	NA	NA	NA	NA	NA	NA	2800000	NA	3400000	NA	NA	NA		Pf02184, Pf05843	0.056	4.60315
Dbn1	IsMasterProteinCandidate	56320	High	Q3TRK3	Putative uncharacterized protein OS=Mus musculus GN=Dbn1 PE=2 SV=1	5.58804	2.72727	1	3	0.000200361	660	0	0	0	1	1	0	NA	NA	NA	NA	NA	NA	14000000	NA	19000000	NA	NA	NA		Pf00241	0.136	7.26045
Dbn1	IsMasterProtein	56320	High	Q9QXS6	Drebrin OS=Mus musculus GN=Dbn1 PE=1 SV=4	5.58804	2.54958	1	3	0.000200361	706	0	0	0	1	1	0	NA	NA	NA	NA	NA	NA	14000000	NA	19000000	NA	NA	NA		Pf00241	0.116	7.26045
Dclk1	IsMasterProteinCandidate	13175	High	Q3UGP0	Putative uncharacterized protein OS=Mus musculus GN=Dclk1 PE=2 SV=1	2.8814	3.0303	1	2	0.00994457	363	0	0	0	1	1	0	NA	NA	NA	NA	NA	NA	3300000	NA	1400000	NA	NA	NA		Pf03607	0.101	0
Dclk1	IsMasterProteinCandidate	13175	High	Q80VB6	Dclk1 protein OS=Mus musculus GN=Dclk1 PE=2 SV=1	2.8814	3.0303	1	2	0.00994457	363	0	0	0	1	1	0	NA	NA	NA	NA	NA	NA	3300000	NA	1400000	NA	NA	NA		Pf03607	0.101	0
Dclk1	IsMasterProteinCandidate	13175	High	Q8VDT3	Dclk1 protein OS=Mus musculus GN=Dclk1 PE=2 SV=1	2.8814	3.0303	1	2	0.00994457	363	0	0	0	1	1	0	NA	NA	NA	NA	NA	NA	3300000	NA	1400000	NA	NA	NA		Pf03607	0.096	0
Dclk1	IsMasterProteinCandidate	13175	High	Q8BRN4	Putative uncharacterized protein OS=Mus musculus GN=Dclk1 PE=2 SV=1	2.8814	2.90237	1	2	0.00994457	379	0	0	0	1	1	0	NA	NA	NA	NA	NA	NA	3300000	NA	1400000	NA	NA	NA		Pf03607	0.105	0
Dclk1	IsMasterProteinCandidate	13175	High	Q9JLM7	Double cortin and calcium/calmodulin-dependent protein kinase-like 1, isoform CRA_c OS=Mus musculus GN=Dclk1 PE=2 SV=1	2.8814	2.08729	1	2	0.00994457	527	0	0	0	1	1	0	NA	NA	NA	NA	NA	NA	3300000	NA	1400000	NA	NA	NA		Pf00069, Pf03607, Pf07714	0.083	0
Dclk1	IsMasterProteinCandidate	13175	High	A3KN70	Dclk1 protein OS=Mus musculus GN=Dclk1 PE=2 SV=1	2.8814	1.48649	1	2	0.00994457	740	0	0	0	1	1	0	NA	NA	NA	NA	NA	NA	3300000	NA	1400000	NA	NA	NA		Pf00069, Pf03607, Pf07714, Pf14531	0.075	0
Dclk1	IsMasterProteinCandidate	13175	High	Q9JLM8	Serine/threonine-protein kinase DCLK1 OS=Mus musculus GN=Dclk1 PE=1 SV=1	2.8814	1.45503	1	2	0.00994457	756	0	0	0	1	1	0	NA	NA	NA	NA	NA	NA	3300000	NA	1400000	NA	NA	NA		Pf00069, Pf03607, Pf07714, Pf14531	0.07	0
Dclk1	IsMasterProtein	13175	High	Q8CHG1	MKIAA0369 protein (Fragment) OS=Mus musculus GN=Dclk1 PE=2 SV=1	2.8814	1.39064	1	2	0.00994457	791	0	0	0	1	1	0	NA	NA	NA	NA	NA	NA	3300000	NA	1400000	NA	NA	NA		Pf00069, Pf03607, Pf07714, Pf14531	0.07	0
Dctn1	IsMasterProteinCandidate	13191	High	D3YX34	Dynactin subunit 1 OS=Mus musculus GN=Dctn1 PE=4 SV=1	11.5157	2.8021	2	2	0	1142	0	0	0	1	0	1	NA	NA	NA	NA	NA	NA	8700000	NA	NA	NA	22000000	NA		Pf05622, Pf05667, Pf06160, Pf12128, Pf12455, Pf15035	0.094	4.86302
Dctn1	IsMasterProteinCandidate	13191	High	E9Q586	Dynactin subunit 1 OS=Mus musculus GN=Dctn1 PE=4 SV=1	11.5157	2.58273	2	2	0	1239	0	0	0	1	0	1	NA	NA	NA	NA	NA	NA	8700000	NA	NA	NA	22000000	NA		Pf01302, Pf05622, Pf05667, Pf06160, Pf12128, Pf12455, Pf13166, Pf15035	0.084	4.86302
Dctn1	IsMasterProteinCandidate	13191	High	Q3T9V8	Putative uncharacterized protein OS=Mus musculus GN=Dctn1 PE=2 SV=1	11.5157	2.58273	2	2	0	1239	0	0	0	1	0	1	NA	NA	NA	NA	NA	NA	8700000	NA	NA	NA	22000000	NA		Pf01302, Pf05622, Pf05667, Pf06160, Pf12128, Pf12455, Pf13166, Pf15035	0.084	4.86302
Dctn1	IsMasterProteinCandidate	13191	High	Q3TB96	Putative uncharacterized protein OS=Mus musculus GN=Dctn1 PE=2 SV=1	11.5157	2.58273	2	2	0	1239	0	0	0	1	0	1	NA	NA	NA	NA	NA	NA	8700000	NA	NA	NA	22000000	NA		Pf01302, Pf05622, Pf05667, Pf06160, Pf12128, Pf12455, Pf15035	0.081	4.86302
Dctn1	IsMasterProteinCandidate	13191	High	E9Q3M3	Dynactin subunit 1 OS=Mus musculus GN=Dctn1 PE=4 SV=1	11.5157	2.53165	2	2	0	1264	0	0	0	1	0	1	NA	NA	NA	NA	NA	NA	8700000	NA	NA	NA	22000000	NA		Pf01302, Pf05622, Pf05667, Pf06160, Pf12128, Pf12455, Pf15035	0.083	4.86302
Dctn1	IsMasterProteinCandidate	13191	High	Q6NZM3	Dctn1 protein OS=Mus musculus GN=Dctn1 PE=2 SV=1	11.5157	2.53165	2	2	0	1264	0	0	0	1	0	1	NA	NA	NA	NA	NA	NA	8700000	NA	NA	NA	22000000	NA		Pf01302, Pf05622, Pf05667, Pf06160, Pf12128, Pf12455, Pf15035	0.083	4.86302
Dctn1	IsMasterProtein	13191	High	O08788	Dynactin subunit 1 OS=Mus musculus GN=Dctn1 PE=1 SV=3	11.5157	2.49805	2	2	0	1281	0	0	0	1	0	1	NA	NA	NA	NA	NA	NA	8700000	NA	NA	NA	22000000	NA		Pf01302, Pf05622, Pf05667, Pf06160, Pf12128, Pf12455, Pf13166, Pf15035	0.081	4.86302
Dctn5	IsMasterProtein	59288	High	Q3UK85	Putative uncharacterized protein OS=Mus musculus GN=Dctn5 PE=2 SV=1	3.74136	5.49451	1	4	0.00054338	182	0	1	0	1	1	1	NA	NA	2700000	NA	NA	NA	4700000	NA	3300000	NA	3100000	NA		Pf00132	0.292	9.58681
Dctn5	IsMasterProteinCandidate	59288	High	Q9QZB9	Dynactin subunit 5 OS=Mus musculus GN=Dctn5 PE=1 SV=1	3.74136	5.49451	1	4	0.00054338	182	0	1	0	1	1	1	NA	NA	2700000	NA	NA	NA	4700000	NA	3300000	NA	3100000	NA		Pf00132	0.334	9.58681
Ddx1	IsMasterProteinCandidate	104721	High	Q91VR5	ATP-dependent RNA helicase DDX1 OS=Mus musculus GN=Ddx1 PE=1 SV=1	3.46268	1.75676	1	2	0.00390071	740	0	0	0	0	1	1	NA	NA	NA	NA	NA	NA	NA	NA	3100000	NA	4000000	NA		Pf00270, Pf00271, Pf00622	0.061	4.34808
Ddx1	IsMasterProtein	104721	High	Q3V1Z7	Putative uncharacterized protein OS=Mus musculus GN=Ddx1 PE=2 SV=1	3.46268	1.75676	1	2	0.00390071	740	0	0	0	0	1	1	NA	NA	NA	NA	NA	NA	NA	NA	3100000	NA	4000000	NA		Pf00270, Pf00271, Pf00622	0.061	4.34808
Ddx1	IsMasterProteinCandidate	104721	High	Q922B8	DEAD (Asp-Glu-Ala-Asp) box polypeptide 1 OS=Mus musculus GN=Ddx1 PE=2 SV=1	3.46268	1.75676	1	2	0.00390071	740	0	0	0	0	1	1	NA	NA	NA	NA	NA	NA	NA	NA	3100000	NA	4000000	NA		Pf00270, Pf00271, Pf00622	0.061	4.34808
Diap1; Diaph1	None	13367	High	Q3US76	Putative uncharacterized protein (Fragment) OS=Mus musculus GN=Diap1 PE=1 SV=1	4.66354	3.21932	1	2	0.000200361	497	0	0	0	1	1	0	NA	NA	NA	NA	NA	NA	3300000	NA	3500000	NA	NA	NA		Pf06367, Pf06371	0.086	4.36059
Diap1; Diaph1	None	13367	High	Q05CS5	Diap1 protein (Fragment) OS=Mus musculus GN=Diap1 PE=2 SV=1	4.66354	2.0915	1	2	0.000200361	765	0	0	0	1	1	0	NA	NA	NA	NA	NA	NA	3300000	NA	3500000	NA	NA	NA		Pf01576, Pf04111, Pf05266, Pf06367, Pf06371, Pf13166	0.068	4.36059
Dnajc13	None	235567	High	Q3TNE7	Putative uncharacterized protein (Fragment) OS=Mus musculus GN=Dnajc13 PE=2 SV=1	4.01122	2.50522	1	3	0.00054338	479	-1	0	0	1	1	0	NA	1000000	NA	NA	NA	NA	2800000	NA	1900000	NA	NA	NA			0.122	6.20628
Dnajc13	None	235567	High	Q3UX52	Putative uncharacterized protein (Fragment) OS=Mus musculus GN=Dnajc13 PE=2 SV=1	7.29071	3.10825	2	3	0	933	0	0	0	1	1	0	NA	NA	NA	NA	NA	NA	3800000	NA	3800000	NA	NA	NA		Pf00226	0.108	8.32061
Dnajc13	None	235567	High	Q3UQJ7	Putative uncharacterized protein (Fragment) OS=Mus musculus GN=Dnajc13 PE=2 SV=1	7.29071	3.05263	2	3	0	950	0	0	0	1	1	0	NA	NA	NA	NA	NA	NA	3800000	NA	3800000	NA	NA	NA		Pf00226	0.11	8.32061
Dnajc13	None	235567	High	Q8CHD7	MKIAA0678 protein (Fragment) OS=Mus musculus GN=Dnajc13 PE=2 SV=1	7.29071	3.00207	2	3	0	966	0	0	0	1	1	0	NA	NA	NA	NA	NA	NA	3800000	NA	3800000	NA	NA	NA		Pf00226	0.108	8.32061
Eci1	IsMasterProteinCandidate	13177	High	Q9DBN7	Putative uncharacterized protein OS=Mus musculus GN=Eci1 PE=2 SV=1	4.52057	5.19031	1	7	0.000200361	289	-1	-1	1	1	1	0	NA	12000000	NA	11000000	24000000	NA	26000000	NA	22000000	NA	42000000	32000000		Pf00378	0.179	12.1323
Eci1	IsMasterProtein	13177	High	P42125	Enoyl-CoA delta isomerase 1, mitochondrial OS=Mus musculus GN=Eci1 PE=1 SV=2	4.52057	5.19031	1	7	0.000200361	289	-1	-1	1	1	1	0	NA	12000000	NA	11000000	24000000	NA	26000000	NA	22000000	NA	42000000	32000000		Pf00378	0.179	12.1323
Eif2a	IsMasterProtein	229317	High	Q8BJW6	Eukaryotic translation initiation factor 2A OS=Mus musculus GN=Eif2a PE=2 SV=2	7.79643	5.16351	2	2	0	581	0	0	0	1	0	1	NA	NA	NA	NA	NA	NA	52000000	NA	NA	NA	7000000	NA		Pf08662	0.093	2.19926
Eif3e	IsMasterProteinCandidate	16341	High	Q9CT23	Putative uncharacterized protein (Fragment) OS=Mus musculus GN=Eif3e PE=2 SV=1	5.66986	3.08057	1	4	0.000200361	422	0	0	0	0	1	1	NA	NA	NA	NA	NA	NA	NA	NA	13000000	NA	36000000	NA		Pf01399, Pf09440	0.245	3.63052
Eif3e	IsMasterProtein	16341	High	Q3UIG0	Eukaryotic translation initiation factor 3 subunit E OS=Mus musculus GN=Eif3e PE=2 SV=1	5.66986	2.92135	1	4	0.000200361	445	0	0	0	0	1	1	NA	NA	NA	NA	NA	NA	NA	NA	13000000	NA	36000000	NA		Pf01399, Pf09440	0.222	3.63052
Emd	IsMasterProteinCandidate	13726	High	Q3THM8	Emerin OS=Mus musculus GN=Emd PE=2 SV=1	11.3146	20.2532	2	12	0	158	0	0	0	1	1	0	14000000	25000000	NA	NA	NA	8400000	6500000	NA	7100000	NA	14000000	2200000		Pf03020	0.668	34.401
Emd	IsMasterProteinCandidate	13726	High	I7HJS1	Emerin OS=Mus musculus GN=Emd PE=4 SV=1	11.3146	14.3498	2	12	0	223	0	0	0	1	1	0	14000000	25000000	NA	NA	NA	8400000	6500000	NA	7100000	NA	14000000	2200000		Pf03020	0.778	34.401
Emd	IsMasterProtein	13726	High	O08579	Emerin OS=Mus musculus GN=Emd PE=1 SV=1	11.3146	12.3552	2	12	0	259	0	0	0	1	1	0	14000000	25000000	NA	NA	NA	8400000	6500000	NA	7100000	NA	14000000	2200000		Pf03020	0.585	34.401
Enah	IsMasterProteinCandidate	13800	High	A0A0A6YW06	Protein enabled homolog OS=Mus musculus GN=Enah PE=4 SV=1	12.1465	4.71338	3	12	0	785	1	0	0	1	1	1	15000000	NA	NA	NA	NA	NA	48000000	NA	89000000	NA	4500000	NA		Pf00568, Pf08776	0.585	13.2467
Enah	IsMasterProteinCandidate	13800	High	E9QKQ9	Protein enabled homolog OS=Mus musculus GN=Enah PE=1 SV=1	12.1465	4.68948	3	12	0	789	1	0	0	1	1	1	15000000	NA	NA	NA	NA	NA	48000000	NA	89000000	NA	4500000	NA		Pf00568, Pf08776	0.585	13.2467
Enah	IsMasterProteinCandidate	13800	High	Q03173	Protein enabled homolog OS=Mus musculus GN=Enah PE=1 SV=2	12.1465	4.61347	3	12	0	802	1	0	0	1	1	1	15000000	NA	NA	NA	NA	NA	48000000	NA	89000000	NA	4500000	NA		Pf00568, Pf08776	0.52	13.2467
Enah	IsMasterProtein	13800	High	E9QLZ9	Protein enabled homolog OS=Mus musculus GN=Enah PE=1 SV=1	12.1465	4.60199	3	12	0	804	1	0	0	1	1	1	15000000	NA	NA	NA	NA	NA	48000000	NA	89000000	NA	4500000	NA		Pf00568, Pf08776	0.52	13.2467
Esrra	IsMasterProtein	26379	High	O08580	Steroid hormone receptor ERR1 OS=Mus musculus GN=Esrra PE=1 SV=4	10.5342	3.79147	1	5	0	422	0	0	0	1	1	1	NA	NA	NA	NA	NA	NA	NA	NA	25000000	NA	14000000	NA		Pf00104, Pf00105	0.359	9.79687
Fis1	None	66437	High	G3X9U9	Fission 1 (Mitochondrial outer membrane) homolog (Yeast), isoform CRA_c OS=Mus musculus GN=Fis1 PE=4 SV=1	3.38122	7.58621	1	5	0.0040007	145	0	1	0	1	1	1	NA	NA	4100000	NA	NA	NA	5200000	NA	5800000	NA	9800000	NA		Pf14852, Pf14853	0.468	10.5271
Gbp2	IsMasterProteinCandidate	14469	High	Q3UDC0	Putative uncharacterized protein (Fragment) OS=Mus musculus GN=Gbp2 PE=2 SV=1	3.70575	4.50928	1	2	0.00054338	377	0	0	0	1	1	0	NA	NA	NA	NA	NA	NA	8900000	NA	8900000	NA	NA	NA		Pf02263, Pf02841	0	4.18512
Gbp2	IsMasterProteinCandidate	14469	High	Q3UDC7	Putative uncharacterized protein (Fragment) OS=Mus musculus GN=Gbp2 PE=2 SV=1	3.70575	3.50515	1	2	0.00054338	485	0	0	0	1	1	0	NA	NA	NA	NA	NA	NA	8900000	NA	8900000	NA	NA	NA		Pf02263, Pf02841, Pf05879	0	4.18512
Gbp2	IsMasterProtein	14469	High	Q9Z0E6	Interferon-induced guanylate-binding protein 2 OS=Mus musculus GN=Gbp2 PE=1 SV=1	3.70575	2.88625	1	2	0.00054338	589	0	0	0	1	1	0	NA	NA	NA	NA	NA	NA	8900000	NA	8900000	NA	NA	NA		Pf02263, Pf02841, Pf05879	0	4.18512
Gm3837; Pdcd5	IsMasterProteinCandidate	100042424; 56330	High	Q564F6	MCG128907 OS=Mus musculus GN=Pdcd5 PE=2 SV=1	4.72216	9.52381	1	5	0.000200361	126	0	-1	0	0	1	1	NA	NA	NA	6800000	NA	NA	24000000	7500000	21000000	NA	23000000	NA		Pf01984	0.259	11.5266
Gm8894	IsMasterProtein	667952	High	B0LAC7	Myosin light polypeptide 6 alkali smooth muscle and non-muscle protein (Fragment) OS=Mus musculus GN=Myl6 PE=2 SV=1	11.3729	92.5926	3	32	0	27	1	0	0	1	1	1	9200000	NA	NA	NA	NA	NA	75000000	NA	31000000	NA	49000000	NA			30.623	47.8843
Herc4	IsMasterProtein	67345	High	Q6PAV2	Probable E3 ubiquitin-protein ligase HERC4 OS=Mus musculus GN=Herc4 PE=2 SV=2	3.76955	1.13529	1	3	0.00054338	1057	0	0	0	1	1	1	NA	NA	NA	NA	NA	NA	4000000	NA	6300000	NA	6500000	NA		Pf00415, Pf00632, Pf13540	0.058	6.55152
Isoc1	IsMasterProteinCandidate	66307	High	Q9D096	Putative uncharacterized protein OS=Mus musculus GN=Isoc1 PE=2 SV=1	4.36442	7.9096	1	3	0.000389257	177	0	0	0	1	1	1	NA	NA	NA	NA	NA	NA	40000000	NA	54000000	NA	66000000	NA		Pf00857	0.259	1.62221
Isoc1	IsMasterProtein	66307	High	Q91V64	Isochorismatase domain-containing protein 1 OS=Mus musculus GN=Isoc1 PE=1 SV=1	4.36442	4.7138	1	3	0.000389257	297	0	0	0	1	1	1	NA	NA	NA	NA	NA	NA	40000000	NA	54000000	NA	66000000	NA		Pf00857	0.212	1.62221
Itga5	None	16402	High	Q3U7M6	Putative uncharacterized protein (Fragment) OS=Mus musculus GN=Itga5 PE=2 SV=1	2.97102	2.09644	1	2	0.00885681	477	0	0	0	1	0	1	NA	NA	NA	NA	NA	NA	38000000	NA	NA	NA	76000000	NA		Pf01839	0.233	0
Kbtbd10; Klhl41	IsMasterProtein	228003	High	A2AUC9	Kelch-like protein 41 OS=Mus musculus GN=Klhl41 PE=1 SV=1	6.90448	2.80528	1	2	0	606	0	0	0	0	1	1	NA	NA	NA	NA	NA	NA	NA	NA	2900000	NA	12000000	NA		Pf00651, Pf01344, Pf07646, Pf07707, Pf13415, Pf13418, Pf13964	0.083	7.22233
Klc2	None	16594	High	O88448	Kinesin light chain 2 OS=Mus musculus GN=Klc2 PE=1 SV=1	9.67359	5.34224	2	3	0	599	0	0	0	0	1	1	NA	NA	NA	NA	NA	NA	NA	NA	3700000	NA	5900000	NA		Pf00515, Pf09311, Pf11068, Pf12895, Pf13374, Pf13414, Pf13424, Pf13432	0.15	6.91097
Klc2	None	16594	High	Q91YS4	Kinesin light chain 2 OS=Mus musculus GN=Klc2 PE=1 SV=1	9.67359	5.16963	2	3	0	619	0	0	0	0	1	1	NA	NA	NA	NA	NA	NA	NA	NA	3700000	NA	5900000	NA		Pf09311, Pf11068, Pf12895, Pf13374, Pf13414, Pf13424, Pf13432	0.145	6.91097
Lancl1	IsMasterProteinCandidate	14768	High	Q8CHW0	Lancl1 protein (Fragment) OS=Mus musculus GN=Lancl1 PE=2 SV=1	3.49635	8.10811	1	3	0.00390071	148	0	0	0	1	1	1	NA	NA	NA	NA	NA	NA	910000	NA	1200000	NA	1200000	NA		Pf05147	0.334	4.3139
Lancl1	IsMasterProteinCandidate	14768	High	B2KGR2	LanC-like protein 1 (Fragment) OS=Mus musculus GN=Lancl1 PE=4 SV=1	3.49635	6.93642	1	3	0.00390071	173	0	0	0	1	1	1	NA	NA	NA	NA	NA	NA	910000	NA	1200000	NA	1200000	NA		Pf05147	0.259	4.3139
Lancl1	IsMasterProtein	14768	High	O89112	LanC-like protein 1 OS=Mus musculus GN=Lancl1 PE=1 SV=1	3.49635	3.00752	1	3	0.00390071	399	0	0	0	1	1	1	NA	NA	NA	NA	NA	NA	910000	NA	1200000	NA	1200000	NA		Pf05147	0.179	4.3139
Ldb3	IsMasterProtein	24131	High	Q9JKS4	LIM domain-binding protein 3 OS=Mus musculus GN=Ldb3 PE=1 SV=1	25.5408	9.26694	5	23	0	723	1	0	0	1	1	1	110000000	NA	NA	NA	NA	NA	43000000	NA	100000000	NA	71000000	NA		Pf00412, Pf00595	0.557	19.0484
Ldb3	IsMasterProtein	24131	High	E9PYJ9	LIM domain-binding protein 3 OS=Mus musculus GN=Ldb3 PE=4 SV=1	20.864	7.8056	4	21	0	679	0	0	0	0	1	1	NA	NA	NA	NA	NA	NA	NA	NA	99000000	NA	200000000	NA		Pf00412, Pf00595	0.65	17.6921
LOC102638521	None	102638521	High	D3YTY6	Protein Gm6096 OS=Mus musculus GN=Gm6096 PE=3 SV=1	4.0347	6.62252	1	7	0.00054338	151	0	0	0	1	1	0	NA	NA	NA	NA	270000000	58000000	430000000	NA	310000000	NA	NA	NA		Pf00276, Pf03939	0.259	5.68188
Mb	IsMasterProtein	17189	High	P04247	Myoglobin OS=Mus musculus GN=Mb PE=1 SV=3	7.65521	9.74026	1	2	0	154	0	0	0	0	1	1	NA	NA	NA	NA	NA	NA	NA	NA	40000000	NA	84000000	NA		Pf00042	0.212	4.83243
Me1	IsMasterProteinCandidate	17436	High	Q61829	MOD-1 null malic enzyme (Fragment) OS=Mus musculus GN=Me1 PE=2 SV=1	5.23277	10.8434	1	2	0.000200361	332	0	0	0	1	1	0	NA	NA	NA	NA	NA	NA	31000000	NA	28000000	NA	NA	NA		Pf03949	0.122	4.34877
Me1	IsMasterProteinCandidate	17436	High	Q3TQP6	Malic enzyme OS=Mus musculus GN=Me1 PE=2 SV=1	5.23277	3.26087	1	2	0.000200361	552	0	0	0	1	1	0	NA	NA	NA	NA	NA	NA	31000000	NA	28000000	NA	NA	NA		Pf00390, Pf03949	0.116	4.34877
Me1	IsMasterProteinCandidate	17436	High	Q99LF5	Me1 protein OS=Mus musculus GN=Me1 PE=2 SV=1	5.23277	3.15789	1	2	0.000200361	570	0	0	0	1	1	0	NA	NA	NA	NA	NA	NA	31000000	NA	28000000	NA	NA	NA		Pf00390, Pf03949	0.105	4.34877
Me1	IsMasterProteinCandidate	17436	High	Q921S3	Malic enzyme OS=Mus musculus GN=Me1 PE=2 SV=1	5.23277	3.14685	1	2	0.000200361	572	0	0	0	1	1	0	NA	NA	NA	NA	NA	NA	31000000	NA	28000000	NA	NA	NA		Pf00390, Pf03949	0.105	4.34877
Me1	IsMasterProtein	17436	High	P06801	NADP-dependent malic enzyme OS=Mus musculus GN=Me1 PE=1 SV=2	5.23277	3.14685	1	2	0.000200361	572	0	0	0	1	1	0	NA	NA	NA	NA	NA	NA	31000000	NA	28000000	NA	NA	NA		Pf00390, Pf03949	0.105	4.34877
Mfn2	IsMasterProteinCandidate	170731	High	A2A7Y8	Mitofusin-2 (Fragment) OS=Mus musculus GN=Mfn2 PE=4 SV=1	6.53328	17.5258	1	5	0	97	0	-1	0	0	1	1	7700000	2900000	NA	2000000	NA	NA	NA	NA	8000000	NA	7600000	NA			0.468	15.7671
Mfn2	IsMasterProteinCandidate	170731	High	A8Y5E5	Mitofusin-2 (Fragment) OS=Mus musculus GN=Mfn2 PE=4 SV=1	6.53328	7.98122	1	5	0	213	0	-1	0	0	1	1	7700000	2900000	NA	2000000	NA	NA	NA	NA	8000000	NA	7600000	NA		Pf00350, Pf01926	0.212	15.7671
Mfn2	IsMasterProteinCandidate	170731	High	Q80U63	Mitofusin-2 OS=Mus musculus GN=Mfn2 PE=1 SV=3	6.53328	2.24571	1	5	0	757	0	-1	0	0	1	1	7700000	2900000	NA	2000000	NA	NA	NA	NA	8000000	NA	7600000	NA		Pf00350, Pf01926, Pf04799	0.068	15.7671
Mfn2	IsMasterProteinCandidate	170731	High	Q3UGM1	Putative uncharacterized protein OS=Mus musculus GN=Mfn2 PE=2 SV=1	6.53328	2.24571	1	5	0	757	0	-1	0	0	1	1	7700000	2900000	NA	2000000	NA	NA	NA	NA	8000000	NA	7600000	NA		Pf00350, Pf01926, Pf04799	0.07	15.7671
Mfn2	IsMasterProtein	170731	High	Q3TEX7	Putative uncharacterized protein OS=Mus musculus GN=Mfn2 PE=2 SV=1	6.53328	2.24571	1	5	0	757	0	-1	0	0	1	1	7700000	2900000	NA	2000000	NA	NA	NA	NA	8000000	NA	7600000	NA		Pf00350, Pf01926, Pf04799	0.068	15.7671
Mogs	IsMasterProteinCandidate	57377	High	Q3U8P9	Putative uncharacterized protein (Fragment) OS=Mus musculus GN=Mogs PE=2 SV=1	7.89394	6.86499	2	2	0	437	0	0	0	1	1	0	NA	NA	NA	NA	NA	NA	4300000	NA	7700000	NA	NA	NA		Pf03200	0.311	3.82029
Mogs	IsMasterProteinCandidate	57377	High	Q3U950	Putative uncharacterized protein (Fragment) OS=Mus musculus GN=Mogs PE=2 SV=1	7.89394	6.86499	2	2	0	437	0	0	0	1	1	0	NA	NA	NA	NA	NA	NA	4300000	NA	7700000	NA	NA	NA		Pf03200	0.311	3.82029
Mogs	IsMasterProteinCandidate	57377	High	Q80UM7	Mannosyl-oligosaccharide glucosidase OS=Mus musculus GN=Mogs PE=2 SV=1	7.89394	3.59712	2	2	0	834	0	0	0	1	1	0	NA	NA	NA	NA	NA	NA	4300000	NA	7700000	NA	NA	NA		Pf03200	0.172	3.82029
Mogs	IsMasterProteinCandidate	57377	High	Q3UME9	Putative uncharacterized protein OS=Mus musculus GN=Mogs PE=2 SV=1	7.89394	3.59712	2	2	0	834	0	0	0	1	1	0	NA	NA	NA	NA	NA	NA	4300000	NA	7700000	NA	NA	NA		Pf03200	0.172	3.82029
Mogs	IsMasterProtein	57377	High	Q3U026	Putative uncharacterized protein OS=Mus musculus GN=Mogs PE=2 SV=1	7.89394	3.59712	2	2	0	834	0	0	0	1	1	0	NA	NA	NA	NA	NA	NA	4300000	NA	7700000	NA	NA	NA		Pf03200	0.172	3.82029
Mrvi1	IsMasterProteinCandidate	17540	High	Q3UR44	Protein MRVI1 (Fragment) OS=Mus musculus GN=Mrvi1 PE=2 SV=1	4.52158	2.0979	1	2	0.000200361	715	0	0	0	0	1	1	NA	NA	NA	NA	NA	NA	NA	NA	15000000	NA	22000000	NA		Pf05781	0.059	7.92494
Mrvi1	IsMasterProteinCandidate	17540	High	Q9WUX5	Protein MRVI1 OS=Mus musculus GN=Mrvi1 PE=1 SV=2	4.52158	1.66852	1	2	0.000200361	899	0	0	0	0	1	1	NA	NA	NA	NA	NA	NA	NA	NA	15000000	NA	22000000	NA		Pf05781	0.056	7.92494
Mrvi1	IsMasterProtein	17540	High	G5E8V5	MRV integration site 1, isoform CRA_b OS=Mus musculus GN=Mrvi1 PE=4 SV=1	4.52158	1.62866	1	2	0.000200361	921	0	0	0	0	1	1	NA	NA	NA	NA	NA	NA	NA	NA	15000000	NA	22000000	NA		Pf05781	0.056	7.92494
Myh6	IsMasterProteinRejected	17888	High	B2RQQ1	MCG133649, isoform CRA_a OS=Mus musculus GN=Myh6 PE=2 SV=1	125.929	9.23633	18	133	0	1938	0	0	0	0	1	1	NA	NA	NA	NA	NA	NA	NA	NA	29000000	NA	83000000	NA		Pf00038, Pf00063, Pf01576, Pf02736, Pf04111, Pf05483, Pf05557, Pf05622, Pf05911, Pf06160, Pf07888, Pf09726, Pf12128, Pf12718, Pf13514	0.734	261.553
Myh6	None	17888	High	Q2TAW4	Myosin, heavy polypeptide 6, cardiac muscle, alpha OS=Mus musculus GN=Myh6 PE=2 SV=1	120.107	8.56553	17	117	0	1938	0	0	0	0	1	1	NA	NA	NA	NA	NA	NA	NA	NA	29000000	NA	83000000	NA		Pf00038, Pf00063, Pf01576, Pf02463, Pf02736, Pf04111, Pf05483, Pf05557, Pf05911, Pf06160, Pf07888, Pf09726, Pf12128, Pf12718, Pf13514	0.699	236.186
Myh9	None	17886	High	A2VCK0	Myh9 protein (Fragment) OS=Mus musculus GN=Myh9 PE=2 SV=1	18.929	24.7706	4	35	0	218	-1	0	-1	0	1	1	NA	8700000	9100000	230000000	NA	120000000	53000000	35000000	NA	NA	130000000	NA			0.931	67.6601
Nacad	IsMasterProtein	192950	High	Q5SWP3	NAC-alpha domain-containing protein 1 OS=Mus musculus GN=Nacad PE=2 SV=1	5.22228	1.39628	1	5	0.000200361	1504	1	0	0	1	1	1	2400000	NA	NA	NA	NA	NA	1500000	NA	2100000	NA	1400000	NA		Pf01849	0.058	15.0279
Nckap1	IsMasterProteinCandidate	50884	High	P28660	Nck-associated protein 1 OS=Mus musculus GN=Nckap1 PE=1 SV=2	5.60227	1.8617	2	3	0.000200361	1128	-1	0	0	1	1	0	NA	29000000	NA	NA	NA	NA	19000000	NA	23000000	NA	NA	NA		Pf09735	0.048	0
Nckap1	IsMasterProteinCandidate	50884	High	A1L0U6	Nckap1 protein (Fragment) OS=Mus musculus GN=Nckap1 PE=2 SV=1	5.60227	1.85349	2	3	0.000200361	1133	-1	0	0	1	1	0	NA	29000000	NA	NA	NA	NA	19000000	NA	23000000	NA	NA	NA		Pf09735	0.047	0
Nckap1	IsMasterProtein	50884	High	A2AS98	Nck-associated protein 1 OS=Mus musculus GN=Nckap1 PE=4 SV=1	5.60227	1.85185	2	3	0.000200361	1134	-1	0	0	1	1	0	NA	29000000	NA	NA	NA	NA	19000000	NA	23000000	NA	NA	NA		Pf09735	0.047	0
Ndrg2	IsMasterProteinCandidate	29811	High	Q8CGR9	NDR2 (Fragment) OS=Mus musculus GN=Ndr2 PE=4 SV=1	5.93517	6.46766	1	3	0.000200361	201	0	0	0	1	1	1	NA	NA	NA	NA	NA	NA	13000000	NA	20000000	NA	26000000	NA		Pf03096	0.468	3.64806
Ndrg2	IsMasterProtein	29811	High	Q9QYG0	Protein NDRG2 OS=Mus musculus GN=Ndrg2 PE=1 SV=1	5.93517	3.50404	1	3	0.000200361	371	0	0	0	1	1	1	NA	NA	NA	NA	NA	NA	13000000	NA	20000000	NA	26000000	NA		Pf00561, Pf03096, Pf12697	0.212	3.64806
Ndufa1	IsMasterProtein	54405	High	O35683	NADH dehydrogenase [ubiquinone] 1 alpha subcomplex subunit 1 OS=Mus musculus GN=Ndufa1 PE=3 SV=1	4.04177	14.2857	1	4	0.00054338	70	-1	0	-1	0	1	1	NA	20000000	NA	NA	NA	16000000	NA	NA	97000000	NA	64000000	NA			0.778	3.75431
Nedd4	None	17999	High	Q3V335	E3 ubiquitin-protein ligase NEDD4 OS=Mus musculus GN=Nedd4 PE=2 SV=1	4.53022	8.85246	2	2	0.000200361	305	0	0	0	1	0	1	NA	NA	NA	NA	NA	NA	NA	NA	NA	NA	6600000	NA		Pf00168, Pf00397	0.259	0
Nedd4	None	17999	High	Q3TUU1	Putative uncharacterized protein OS=Mus musculus GN=Nedd4 PE=2 SV=1	4.53022	6.78392	2	2	0.000200361	398	0	0	0	1	0	1	NA	NA	NA	NA	NA	NA	NA	NA	NA	NA	6600000	NA		Pf00168, Pf00397	0.194	0
Nploc4	IsMasterProtein	217365	High	P60670	Nuclear protein localization protein 4 homolog OS=Mus musculus GN=Nploc4 PE=1 SV=3	9.9913	4.44079	2	8	0	608	1	0	-1	1	1	1	10000000	NA	NA	NA	NA	3200000	9600000	NA	8400000	NA	10000000	NA		Pf05020, Pf05021, Pf11543	0.194	23.3504
Nploc4	IsMasterProteinCandidate	217365	High	Q3UDU9	Putative uncharacterized protein OS=Mus musculus GN=Nploc4 PE=2 SV=1	9.9913	4.44079	2	8	0	608	1	0	-1	1	1	1	10000000	NA	NA	NA	NA	3200000	9600000	NA	8400000	NA	10000000	NA		Pf05020, Pf05021, Pf11543	0.194	23.3504
Nploc4	None	217365	High	Q3UE06	Putative uncharacterized protein OS=Mus musculus GN=Nploc4 PE=2 SV=1	6.41748	2.96053	1	5	0.000200361	608	1	0	-1	1	1	1	10000000	NA	NA	NA	NA	3200000	17000000	NA	16000000	NA	19000000	NA		Pf05020, Pf05021, Pf11543	0.093	18.7683
Ogdh	None	18293	High	Q6P8I7	Ogdh protein OS=Mus musculus GN=Ogdh PE=2 SV=1	15.5721	10.2804	3	15	0	214	0	0	0	1	1	0	58000000	13000000	8100000	6800000	63000000	4000000	88000000	NA	97000000	NA	140000000	29000000			0.719	7.54771
Pabpc1	None	18458	High	Q05DT1	Pabpc1 protein (Fragment) OS=Mus musculus GN=Pabpc1 PE=2 SV=1	12.1688	36.3636	2	23	0	77	0	0	0	1	1	0	NA	NA	NA	NA	NA	NA	520000000	NA	570000000	NA	NA	NA		Pf00076, Pf13893, Pf14259	3.642	69.1663
Pdcd5	IsMasterProtein	56330	High	D3Z7Q5	Programmed cell death protein 5 OS=Mus musculus GN=Pdcd5 PE=1 SV=1	4.72216	5.85366	1	5	0.000200361	205	0	-1	0	0	1	1	NA	NA	NA	6800000	NA	NA	24000000	7500000	21000000	NA	23000000	NA		Pf01984	0.212	11.5266
Pdha1	IsMasterProtein	18597	High	P35486	Pyruvate dehydrogenase E1 component subunit alpha, somatic form, mitochondrial OS=Mus musculus GN=Pdha1 PE=1 SV=1	3.65956	2.82051	1	10	0.00054338	390	0	0	1	1	1	1	88000000	NA	NA	NA	89000000	NA	76000000	NA	74000000	NA	81000000	NA		Pf00676	0.105	3.6235
Pdhb	IsMasterProtein	68263	High	Q9D051	Pyruvate dehydrogenase E1 component subunit beta, mitochondrial OS=Mus musculus GN=Pdhb PE=1 SV=1	23.6336	19.7772	5	21	0	359	0	-1	0	1	1	0	44000000	19000000	NA	23000000	20000000	26000000	31000000	NA	39000000	NA	27000000	13000000		Pf02779, Pf02780	1.276	39.7343
Pdlim5	None	56376	High	Q9CRA2	PDZ and LIM domain protein 5 OS=Mus musculus GN=Pdlim5 PE=2 SV=1	8.19157	7.00935	1	4	0	214	0	0	0	1	1	1	NA	NA	NA	NA	NA	NA	110000000	NA	48000000	NA	62000000	NA		Pf00595	0.212	11.4805
Pdlim5	None	56376	High	D9J303	ENH isoform 3a OS=Mus musculus GN=Pdlim5 PE=2 SV=1	8.19157	6.41026	1	4	0	234	0	0	0	1	1	1	NA	NA	NA	NA	NA	NA	110000000	NA	48000000	NA	62000000	NA		Pf00595, Pf13180	0.233	11.4805
Pdlim5	None	56376	High	E9Q8P5	PDZ and LIM domain protein 5 OS=Mus musculus GN=Pdlim5 PE=1 SV=2	8.19157	6.27615	1	4	0	239	0	0	0	1	1	1	NA	NA	NA	NA	NA	NA	110000000	NA	48000000	NA	62000000	NA		Pf00595	0.212	11.4805
Picalm	IsMasterProteinCandidate	233489	High	Q3TD51	Putative uncharacterized protein OS=Mus musculus GN=Picalm PE=2 SV=1	14.2785	7.8727	3	9	0	597	0	0	1	1	1	1	NA	NA	NA	NA	9800000	NA	18000000	NA	24000000	NA	8100000	NA		Pf01417, Pf07651	0.413	14.039
Picalm	IsMasterProteinCandidate	233489	High	Q7M6Y3	Phosphatidylinositol-binding clathrin assembly protein OS=Mus musculus GN=Picalm PE=1 SV=1	14.2785	7.12121	3	9	0	660	0	0	1	1	1	1	NA	NA	NA	NA	9800000	NA	18000000	NA	24000000	NA	8100000	NA		Pf01417, Pf07651	0.389	14.039
Picalm	IsMasterProtein	233489	High	Q570Z8	MKIAA4114 protein (Fragment) OS=Mus musculus GN=Picalm PE=2 SV=1	14.2785	6.97329	3	9	0	674	0	0	1	1	1	1	NA	NA	NA	NA	9800000	NA	18000000	NA	24000000	NA	8100000	NA		Pf01417, Pf07651	0.369	14.039
Pitpna	IsMasterProteinCandidate	18738	High	P53810	Phosphatidylinositol transfer protein alpha isoform OS=Mus musculus GN=Pitpna PE=1 SV=2	3.40251	2.58303	1	4	0.0040007	271	1	0	0	1	1	1	7300000	NA	NA	NA	NA	NA	8200000	NA	3800000	NA	3400000	NA		Pf02121	0.233	0
Pitpna	IsMasterProteinCandidate	18738	High	Q3UE53	Putative uncharacterized protein OS=Mus musculus GN=Pitpna PE=2 SV=1	3.40251	2.58303	1	4	0.0040007	271	1	0	0	1	1	1	7300000	NA	NA	NA	NA	NA	8200000	NA	3800000	NA	3400000	NA		Pf02121	0.233	0
Pitpna	IsMasterProteinCandidate	18738	High	Q3TGI6	Putative uncharacterized protein (Fragment) OS=Mus musculus GN=Pitpna PE=2 SV=1	3.40251	2.01729	1	4	0.0040007	347	1	0	0	1	1	1	7300000	NA	NA	NA	NA	NA	8200000	NA	3800000	NA	3400000	NA		Pf02121	0.179	0
Pitpna	IsMasterProtein	18738	High	Q3TIQ3	Putative uncharacterized protein (Fragment) OS=Mus musculus GN=Pitpna PE=2 SV=1	3.40251	2	1	4	0.0040007	350	1	0	0	1	1	1	7300000	NA	NA	NA	NA	NA	8200000	NA	3800000	NA	3400000	NA		Pf02121	0.179	0
Pklr	IsMasterProteinCandidate	18770	High	Q3UEH4	Pyruvate kinase OS=Mus musculus GN=Pklr PE=2 SV=1	5.74746	6.07735	2	3	0.000200361	543	0	0	0	0	1	1	NA	NA	NA	NA	NA	NA	NA	NA	1300000	NA	2300000	NA		Pf00224, Pf02887	0.179	7.42403
Pklr	IsMasterProteinCandidate	18770	High	E9Q509	Pyruvate kinase OS=Mus musculus GN=Pklr PE=3 SV=1	5.74746	6.07735	2	3	0.000200361	543	0	0	0	0	1	1	NA	NA	NA	NA	NA	NA	NA	NA	1300000	NA	2300000	NA		Pf00224, Pf02887	0.179	7.42403
Pklr	IsMasterProteinCandidate	18770	High	Q3UEI4	Pyruvate kinase (Fragment) OS=Mus musculus GN=Pklr PE=2 SV=1	5.74746	6.04396	2	3	0.000200361	546	0	0	0	0	1	1	NA	NA	NA	NA	NA	NA	NA	NA	1300000	NA	2300000	NA		Pf00224, Pf02887	0.179	7.42403
Pklr	IsMasterProteinCandidate	18770	High	A7MCU9	Pyruvate kinase OS=Mus musculus GN=Pklr PE=2 SV=1	5.74746	5.78947	2	3	0.000200361	570	0	0	0	0	1	1	NA	NA	NA	NA	NA	NA	NA	NA	1300000	NA	2300000	NA		Pf00224, Pf02887	0.194	7.42403
Pklr	IsMasterProtein	18770	High	G3X925	Pyruvate kinase OS=Mus musculus GN=Pklr PE=3 SV=1	5.74746	5.74913	2	3	0.000200361	574	0	0	0	0	1	1	NA	NA	NA	NA	NA	NA	NA	NA	1300000	NA	2300000	NA		Pf00224, Pf02887	0.179	7.42403
Ppa1	IsMasterProteinCandidate	67895	High	Q8BTY3	Putative uncharacterized protein OS=Mus musculus GN=Ppa1 PE=2 SV=1	6.03145	10.4167	2	9	0.000200361	288	0	0	0	1	1	0	13000000	12000000	12000000	7100000	NA	NA	34000000	NA	6900000	NA	22000000	7300000		Pf00719	0.292	22.9906
Ppa1	IsMasterProtein	67895	High	Q3UA53	Putative uncharacterized protein OS=Mus musculus GN=Ppa1 PE=2 SV=1	6.03145	10.3806	2	9	0.000200361	289	0	0	0	1	1	0	13000000	12000000	12000000	7100000	NA	NA	34000000	NA	6900000	NA	22000000	7300000		Pf00719	0.292	22.9906
Ppa1	IsMasterProteinCandidate	67895	High	Q4FK49	Pyp protein OS=Mus musculus GN=Ppa1 PE=2 SV=1	6.03145	10.3806	2	9	0.000200361	289	0	0	0	1	1	0	13000000	12000000	12000000	7100000	NA	NA	34000000	NA	6900000	NA	22000000	7300000		Pf00719	0.292	22.9906
Ppm1e	IsMasterProtein	320472	High	Q80TL0	Protein phosphatase 1E OS=Mus musculus GN=Ppm1e PE=1 SV=2	6.31311	3.20427	2	2	0.000200361	749	0	0	0	1	0	1	NA	NA	NA	NA	NA	NA	6400000	NA	NA	NA	4900000	NA		Pf00481	0.172	0
Ppp2r2a	None	71978	High	Q7TPQ7	Serine/threonine-protein phosphatase 2A 55 kDa regulatory subunit B (Fragment) OS=Mus musculus GN=Ppp2r2a PE=2 SV=1	4.84103	5.69106	1	3	0.000200361	246	0	0	0	1	1	1	NA	NA	NA	NA	NA	NA	19000000	NA	18000000	NA	30000000	NA			0.212	0
Ppp2r2a	IsMasterProteinCandidate	71978	High	Q9CWU3	Serine/threonine-protein phosphatase 2A 55 kDa regulatory subunit B OS=Mus musculus GN=Ppp2r2a PE=2 SV=1	7.79143	7.08447	2	4	0	367	1	0	0	1	1	1	36000000	NA	NA	NA	NA	NA	19000000	NA	18000000	NA	30000000	NA			0.334	1.71936
Ppp2r2a	IsMasterProteinCandidate	71978	High	Q3TPC5	Serine/threonine-protein phosphatase 2A 55 kDa regulatory subunit B (Fragment) OS=Mus musculus GN=Ppp2r2a PE=2 SV=1	7.79143	6.45161	2	4	0	403	1	0	0	1	1	1	36000000	NA	NA	NA	NA	NA	19000000	NA	18000000	NA	30000000	NA			0.274	1.71936
Ppp2r2a	IsMasterProteinCandidate	71978	High	Q3TT94	Serine/threonine-protein phosphatase 2A 55 kDa regulatory subunit B OS=Mus musculus GN=Ppp2r2a PE=2 SV=1	7.79143	5.81655	2	4	0	447	1	0	0	1	1	1	36000000	NA	NA	NA	NA	NA	19000000	NA	18000000	NA	30000000	NA			0.245	1.71936
Ppp2r2a	IsMasterProtein	71978	High	Q571J7	Serine/threonine-protein phosphatase 2A 55 kDa regulatory subunit B (Fragment) OS=Mus musculus GN=Ppp2r2a PE=2 SV=1	7.79143	5.10806	2	4	0	509	1	0	0	1	1	1	36000000	NA	NA	NA	NA	NA	19000000	NA	18000000	NA	30000000	NA			0.212	1.71936
Ppp2r2b	None	72930	High	Q6ZWR4	Serine/threonine-protein phosphatase 2A 55 kDa regulatory subunit B beta isoform OS=Mus musculus GN=Ppp2r2b PE=1 SV=1	4.84103	3.16027	1	3	0.000200361	443	0	0	0	1	1	1	NA	NA	NA	NA	NA	NA	19000000	NA	18000000	NA	30000000	NA			0.136	0
Ppp2r2b	None	72930	High	Q8BVB4	Serine/threonine-protein phosphatase 2A 55 kDa regulatory subunit B OS=Mus musculus GN=Ppp2r2b PE=2 SV=1	4.84103	3.13901	1	3	0.000200361	446	0	0	0	1	1	1	NA	NA	NA	NA	NA	NA	19000000	NA	18000000	NA	30000000	NA			0.136	0
Ppp2r2d	None	52432	High	F6RV17	Serine/threonine-protein phosphatase 2A 55 kDa regulatory subunit B OS=Mus musculus GN=Ppp2r2d PE=3 SV=2	4.84103	4.86111	1	3	0.000200361	288	0	0	0	1	1	1	NA	NA	NA	NA	NA	NA	19000000	NA	18000000	NA	30000000	NA			0.194	0
Ppp2r2d	None	52432	High	Q925E7	Serine/threonine-protein phosphatase 2A 55 kDa regulatory subunit B delta isoform OS=Mus musculus GN=Ppp2r2d PE=2 SV=1	4.84103	3.09051	1	3	0.000200361	453	0	0	0	1	1	1	NA	NA	NA	NA	NA	NA	19000000	NA	18000000	NA	30000000	NA			0.145	0
Prkaa1	IsMasterProteinCandidate	105787	High	Q3TUQ7	Prkaa1 protein OS=Mus musculus GN=Prkaa1 PE=2 SV=1	5.99827	3.09091	1	3	0.000200361	550	0	0	0	1	1	1	NA	NA	NA	NA	NA	NA	22000000	NA	28000000	NA	23000000	NA		Pf00069, Pf07714, Pf14531	0.086	8.16739
Prkaa1	IsMasterProtein	105787	High	Q5EG47	5'-AMP-activated protein kinase catalytic subunit alpha-1 OS=Mus musculus GN=Prkaa1 PE=1 SV=2	5.99827	3.04114	1	3	0.000200361	559	0	0	0	1	1	1	NA	NA	NA	NA	NA	NA	22000000	NA	28000000	NA	23000000	NA		Pf00069, Pf07714, Pf14531	0.086	8.16739
Prkaa2	IsMasterProteinCandidate	108079	High	Q8BRK8	5'-AMP-activated protein kinase catalytic subunit alpha-2 OS=Mus musculus GN=Prkaa2 PE=1 SV=3	5.99827	3.07971	1	3	0.000200361	552	0	0	0	1	1	1	NA	NA	NA	NA	NA	NA	22000000	NA	28000000	NA	23000000	NA		Pf00069, Pf07714, Pf14531	0.093	8.16739
Prkcd	IsMasterProteinCandidate	18753	High	Q80UN7	Prkcd protein OS=Mus musculus GN=Prkcd PE=2 SV=1	3.656	2.46407	1	4	0.00054338	487	0	0	0	1	1	0	40000000	40000000	NA	NA	NA	NA	42000000	NA	37000000	NA	NA	NA		Pf00069, Pf00130, Pf07714	0.096	0
Prkcd	IsMasterProteinCandidate	18753	High	Q1MX41	Protein kinase C OS=Mus musculus GN=Prkcd PE=2 SV=1	3.656	2.20183	1	4	0.00054338	545	0	0	0	1	1	0	40000000	40000000	NA	NA	NA	NA	42000000	NA	37000000	NA	NA	NA		Pf00069, Pf00130, Pf07714, Pf14531	0.093	0
Prkcd	IsMasterProteinCandidate	18753	High	Q1MX43	Protein kinase C OS=Mus musculus GN=Prkcd PE=2 SV=1	3.656	2.14669	1	4	0.00054338	559	0	0	0	1	1	0	40000000	40000000	NA	NA	NA	NA	42000000	NA	37000000	NA	NA	NA		Pf00069, Pf00130, Pf00433, Pf07714, Pf14531	0.093	0
Prkcd	IsMasterProteinCandidate	18753	High	Q1MX40	Protein kinase C OS=Mus musculus GN=Prkcd PE=2 SV=1	3.656	2.10158	1	4	0.00054338	571	0	0	0	1	1	0	40000000	40000000	NA	NA	NA	NA	42000000	NA	37000000	NA	NA	NA		Pf00069, Pf00130, Pf07714, Pf14531	0.089	0
Prkcd	IsMasterProteinCandidate	18753	High	Q1MX42	Protein kinase C OS=Mus musculus GN=Prkcd PE=2 SV=1	3.656	2.05128	1	4	0.00054338	585	0	0	0	1	1	0	40000000	40000000	NA	NA	NA	NA	42000000	NA	37000000	NA	NA	NA		Pf00069, Pf00130, Pf00433, Pf07714, Pf14531	0.089	0
Prkcd	IsMasterProteinCandidate	18753	High	Q3UNG2	Protein kinase C delta type OS=Mus musculus GN=Prkcd PE=2 SV=1	3.656	1.78042	1	4	0.00054338	674	0	0	0	1	1	0	40000000	40000000	NA	NA	NA	NA	42000000	NA	37000000	NA	NA	NA		Pf00069, Pf00130, Pf00433, Pf07714, Pf14531	0.072	0
Prkcd	IsMasterProtein	18753	High	Q3TGE4	Protein kinase C delta type OS=Mus musculus GN=Prkcd PE=2 SV=1	3.656	1.78042	1	4	0.00054338	674	0	0	0	1	1	0	40000000	40000000	NA	NA	NA	NA	42000000	NA	37000000	NA	NA	NA		Pf00069, Pf00130, Pf00433, Pf07714	0.07	0
Prkcd	IsMasterProteinCandidate	18753	High	Q53YN4	Protein kinase C delta type OS=Mus musculus GN=Prkcd PE=2 SV=1	3.656	1.78042	1	4	0.00054338	674	0	0	0	1	1	0	40000000	40000000	NA	NA	NA	NA	42000000	NA	37000000	NA	NA	NA		Pf00069, Pf00130, Pf00433, Pf07714, Pf14531	0.072	0
Prune	IsMasterProtein	229589	High	Q8BIW1	Protein prune homolog OS=Mus musculus GN=Prune PE=2 SV=1	5.07727	3.30396	1	2	0.000200361	454	0	0	0	0	1	1	NA	NA	NA	NA	NA	NA	NA	NA	5900000	NA	8200000	NA		Pf01368, Pf02833	0.136	4.36053
Psma2	IsMasterProteinCandidate	19166	High	P49722	Proteasome subunit alpha type-2 OS=Mus musculus GN=Psma2 PE=1 SV=3	4.30998	5.98291	1	3	0.000389257	234	0	0	0	1	1	1	NA	NA	NA	NA	NA	NA	60000000	NA	70000000	NA	67000000	NA		Pf00227, Pf10584	0.292	6.27795
Psma2	IsMasterProteinCandidate	19166	High	Q9CZ58	Proteasome subunit alpha type OS=Mus musculus GN=Psma2 PE=2 SV=1	4.30998	5.98291	1	3	0.000389257	234	0	0	0	1	1	1	NA	NA	NA	NA	NA	NA	60000000	NA	70000000	NA	67000000	NA		Pf00227, Pf10584	0.233	6.27795
Psma2	IsMasterProtein	19166	High	Q3UWT6	Proteasome subunit alpha type OS=Mus musculus GN=Psma2 PE=2 SV=1	4.30998	5.66802	1	3	0.000389257	247	0	0	0	1	1	1	NA	NA	NA	NA	NA	NA	60000000	NA	70000000	NA	67000000	NA		Pf00227, Pf10584	0.259	6.27795
Psma3	IsMasterProteinCandidate	19167	High	Q3TEL1	Putative uncharacterized protein OS=Mus musculus GN=Psma3 PE=2 SV=1	4.5379	6.66667	1	2	0.000200361	180	0	0	0	1	0	1	NA	NA	NA	NA	NA	NA	20000000	NA	NA	NA	38000000	NA		Pf00227	0.334	2.18165
Psma3	IsMasterProteinCandidate	19167	High	E0CX62	Proteasome subunit alpha type-3 OS=Mus musculus GN=Psma3 PE=1 SV=2	4.5379	6.66667	1	2	0.000200361	180	0	0	0	1	0	1	NA	NA	NA	NA	NA	NA	20000000	NA	NA	NA	38000000	NA		Pf00227	0.334	2.18165
Psma3	IsMasterProteinCandidate	19167	High	Q9DCD8	Proteasome subunit alpha type OS=Mus musculus GN=Psma3 PE=2 SV=1	4.5379	4.70588	1	2	0.000200361	255	0	0	0	1	0	1	NA	NA	NA	NA	NA	NA	20000000	NA	NA	NA	38000000	NA		Pf00227, Pf10584	0.194	2.18165
Psma3	IsMasterProtein	19167	High	Q58EV4	Proteasome subunit alpha type OS=Mus musculus GN=Psma3 PE=2 SV=1	4.5379	4.70588	1	2	0.000200361	255	0	0	0	1	0	1	NA	NA	NA	NA	NA	NA	20000000	NA	NA	NA	38000000	NA		Pf00227, Pf10584	0.194	2.18165
Psmb1	IsMasterProtein	19170	High	O09061	Proteasome subunit beta type-1 OS=Mus musculus GN=Psmb1 PE=1 SV=1	3.55114	7.5	1	2	0.00178031	240	0	0	0	1	0	1	NA	NA	NA	NA	NA	NA	1900000	NA	NA	NA	1500000	NA		Pf00227	0.233	4.76898
Psmc1	IsMasterProtein	19179	High	P62192	26S protease regulatory subunit 4 OS=Mus musculus GN=Psmc1 PE=1 SV=1	5.35428	3.40909	1	4	0.000200361	440	1	0	0	1	1	1	16000000	NA	NA	NA	NA	NA	23000000	NA	19000000	NA	26000000	NA		Pf00004, Pf00910, Pf01078, Pf05496, Pf05673, Pf05729, Pf07724, Pf07726, Pf07728, Pf13191, Pf13401	0.105	9.12864
Psmd8	IsMasterProteinCandidate	57296	High	Q3TG45	Putative uncharacterized protein OS=Mus musculus GN=Psmd8 PE=2 SV=1	3.71874	5.92885	1	2	0.00054338	253	0	0	0	0	1	1	NA	NA	NA	NA	NA	NA	NA	NA	5500000	NA	12000000	NA		Pf03399, Pf10075	0.155	0
Psmd8	IsMasterProteinCandidate	57296	High	Q99JB5	Proteasome (Prosome, macropain) 26S subunit, non-ATPase, 8 OS=Mus musculus GN=Psmd8 PE=2 SV=1	3.71874	5.83658	1	2	0.00054338	257	0	0	0	0	1	1	NA	NA	NA	NA	NA	NA	NA	NA	5500000	NA	12000000	NA		Pf03399, Pf10075	0.136	0
Psmd8	IsMasterProteinCandidate	57296	High	Q3TW90	Putative uncharacterized protein OS=Mus musculus GN=Psmd8 PE=2 SV=1	3.71874	5.19031	1	2	0.00054338	289	0	0	0	0	1	1	NA	NA	NA	NA	NA	NA	NA	NA	5500000	NA	12000000	NA		Pf03399, Pf10075	0.145	0
Psmd8	IsMasterProteinCandidate	57296	High	Q9CPS5	26S proteasome non-ATPase regulatory subunit 8 OS=Mus musculus GN=Psmd8 PE=2 SV=2	3.71874	5.19031	1	2	0.00054338	289	0	0	0	0	1	1	NA	NA	NA	NA	NA	NA	NA	NA	5500000	NA	12000000	NA		Pf03399, Pf10075	0.145	0
Psmd8	IsMasterProteinCandidate	57296	High	Q3TI95	Putative uncharacterized protein OS=Mus musculus GN=Psmd8 PE=2 SV=1	3.71874	5.19031	1	2	0.00054338	289	0	0	0	0	1	1	NA	NA	NA	NA	NA	NA	NA	NA	5500000	NA	12000000	NA		Pf03399, Pf10075	0.145	0
Psmd8	IsMasterProteinCandidate	57296	High	Q8BKP5	Putative uncharacterized protein OS=Mus musculus GN=Psmd8 PE=2 SV=1	3.71874	5.19031	1	2	0.00054338	289	0	0	0	0	1	1	NA	NA	NA	NA	NA	NA	NA	NA	5500000	NA	12000000	NA		Pf03399, Pf10075	0.145	0
Psmd8	IsMasterProteinCandidate	57296	High	Q3TVY0	Putative uncharacterized protein OS=Mus musculus GN=Psmd8 PE=2 SV=1	3.71874	4.88599	1	2	0.00054338	307	0	0	0	0	1	1	NA	NA	NA	NA	NA	NA	NA	NA	5500000	NA	12000000	NA		Pf03399, Pf10075	0.145	0
Psmd8	IsMasterProtein	57296	High	Q9CX56	26S proteasome non-ATPase regulatory subunit 8 OS=Mus musculus GN=Psmd8 PE=1 SV=2	3.71874	4.24929	1	2	0.00054338	353	0	0	0	0	1	1	NA	NA	NA	NA	NA	NA	NA	NA	5500000	NA	12000000	NA		Pf03399, Pf10075	0.145	0
Ptplad1; Hacd3	IsMasterProtein	57874	High	Q8K2C9	Very-long-chain (3R)-3-hydroxyacyl-CoA dehydratase 3 OS=Mus musculus GN=ptplad1 PE=1 SV=2	6.19416	4.14365	1	2	0.000200361	362	0	0	0	0	1	1	NA	NA	NA	NA	NA	NA	NA	NA	20000000	NA	24000000	NA		Pf04387, Pf04969	0.233	2.17773
Rab6b	None	270192	High	P61294	Ras-related protein Rab-6B OS=Mus musculus GN=Rab6b PE=1 SV=1	7.62961	11.0577	2	19	0	208	0	0	0	1	1	1	NA	NA	NA	NA	NA	NA	8700000	NA	11000000	NA	12000000	NA		Pf00025, Pf00071, Pf02421, Pf04670, Pf08477	0.359	20.6702
Rap1a	None	109905	High	Q3V3W9	Putative uncharacterized protein OS=Mus musculus GN=Rap1a PE=2 SV=1	3.5373	5.97826	1	10	0.00178031	184	0	0	0	0	1	1	350000000	88000000	340000000	73000000	230000000	29000000	NA	NA	610000000	NA	860000000	NA		Pf00071, Pf08477	0.334	5.14905
Rock2	IsMasterProtein	19878	High	F8VPK5	Rho-associated protein kinase OS=Mus musculus GN=Rock2 PE=3 SV=1	12.5901	4.39481	4	8	0	1388	-1	-1	0	0	1	1	NA	11000000	NA	15000000	25000000	7100000	NA	NA	62000000	NA	46000000	NA		Pf00038, Pf00069, Pf00130, Pf01576, Pf01636, Pf02185, Pf02463, Pf04111, Pf04156, Pf05557, Pf05622, Pf05667, Pf06160, Pf07714, Pf07888, Pf08912, Pf09726, Pf09731, Pf11559, Pf12128, Pf12718, Pf12795, Pf14531	0.112	18.1435
Rock2	None	19878	High	P70336	Rho-associated protein kinase 2 OS=Mus musculus GN=Rock2 PE=1 SV=1	10.5444	3.17003	3	7	0	1388	-1	-1	0	0	1	1	NA	11000000	NA	15000000	25000000	7100000	NA	NA	62000000	NA	43000000	NA		Pf00038, Pf00069, Pf00130, Pf01576, Pf01636, Pf02185, Pf02463, Pf04111, Pf04156, Pf05557, Pf05622, Pf05667, Pf06160, Pf07714, Pf07888, Pf08912, Pf09726, Pf09731, Pf11559, Pf12128, Pf12718, Pf12795, Pf14531	0.083	15.66
Rock2	None	19878	High	Q6A035	MKIAA0619 protein (Fragment) OS=Mus musculus GN=Rock2 PE=2 SV=1	6.88422	3.4749	2	4	0	777	0	0	0	0	1	1	NA	NA	NA	NA	25000000	7200000	NA	NA	62000000	NA	43000000	NA		Pf00130, Pf04111, Pf08912	0.094	6.83601
Rpl13a	None	22121	High	Q3TDS9	Putative uncharacterized protein OS=Mus musculus GN=Rpl13a PE=2 SV=1	6.15022	10.9827	2	11	0.000200361	173	0	1	0	1	1	1	17000000	6000000	19000000	NA	14000000	3900000	9300000	NA	12000000	NA	19000000	NA		Pf00572	0.359	4.44575
Rps6ka2	None	20112	High	Q8CHM5	Ribosomal protein S6 kinase (Fragment) OS=Mus musculus PE=4 SV=1	17.8714	5.22599	3	14	0	708	0	0	0	1	1	0	NA	NA	NA	NA	NA	NA	9200000	NA	5300000	NA	NA	NA		Pf00069, Pf00433, Pf07714, Pf14531	0.301	30.6584
Rps6ka2	None	20112	High	Q9WUT3	Ribosomal protein S6 kinase alpha-2 OS=Mus musculus GN=Rps6ka2 PE=1 SV=1	17.8714	5.04775	3	14	0	733	0	0	0	1	1	0	NA	NA	NA	NA	NA	NA	9200000	NA	5300000	NA	NA	NA		Pf00069, Pf00433, Pf07714, Pf14531	0.266	30.6584
Rps6ka2	None	20112	High	Q7TPD5	Ribosomal protein S6 kinase OS=Mus musculus GN=Rps6ka2 PE=2 SV=1	17.8714	5.04775	3	14	0	733	0	0	0	1	1	0	NA	NA	NA	NA	NA	NA	9200000	NA	5300000	NA	NA	NA		Pf00069, Pf00433, Pf07714, Pf14531	0.266	30.6584
Rps6ka3	IsMasterProteinCandidate	110651	High	B1AXN9	Ribosomal protein S6 kinase alpha-3 OS=Mus musculus GN=Rps6ka3 PE=4 SV=1	23.0438	8.56742	5	18	0	712	1	0	0	1	1	1	NA	NA	NA	NA	NA	NA	14000000	NA	17000000	NA	19000000	NA		Pf00069, Pf00433, Pf07714, Pf14531	0.453	33.6539
Rps6ka3	IsMasterProteinCandidate	110651	High	P18654	Ribosomal protein S6 kinase alpha-3 OS=Mus musculus GN=Rps6ka3 PE=1 SV=2	23.0438	8.24324	5	18	0	740	1	0	0	1	1	1	NA	NA	NA	NA	NA	NA	14000000	NA	17000000	NA	19000000	NA		Pf00069, Pf00433, Pf07714, Pf14531	0.438	33.6539
Rps6ka3	IsMasterProtein	110651	High	A7E215	Rps6ka3 protein (Fragment) OS=Mus musculus GN=Rps6ka3 PE=2 SV=1	23.0438	8.23212	5	18	0	741	1	0	0	1	1	1	NA	NA	NA	NA	NA	NA	14000000	NA	17000000	NA	19000000	NA		Pf00069, Pf00433, Pf07714, Pf14531	0.438	33.6539
Sct	IsMasterProteinCandidate	20287	High	Q3TJJ8	Putative uncharacterized protein OS=Mus musculus GN=Sct PE=2 SV=1	7.03315	11.2782	1	3	0	133	0	0	0	0	1	1	NA	NA	NA	NA	NA	NA	NA	NA	59000000	NA	110000000	NA		Pf00123	0.468	5.56476
Sct	IsMasterProteinCandidate	20287	High	Q08535	Secretin OS=Mus musculus GN=Sct PE=2 SV=1	7.03315	11.2782	1	3	0	133	0	0	0	0	1	1	NA	NA	NA	NA	NA	NA	NA	NA	59000000	NA	110000000	NA		Pf00123	0.468	5.56476
Sct	IsMasterProtein	20287	High	Q80ZS9	Sct protein OS=Mus musculus GN=Sct PE=2 SV=1	7.03315	10.7914	1	3	0	139	0	0	0	0	1	1	NA	NA	NA	NA	NA	NA	NA	NA	59000000	NA	110000000	NA		Pf00123	0.468	5.56476
Sept6	IsMasterProtein	56526	High	Q9R1T4	Septin-6 OS=Mus musculus GN=Sept6 PE=1 SV=4	5.77028	6.68203	2	2	0.000200361	434	0	0	0	1	0	1	NA	NA	NA	NA	NA	NA	25000000	NA	NA	NA	97000000	NA		Pf00735	0.274	2.52126
Sh3d19	IsMasterProtein	27059	High	Q91X43	SH3 domain-containing protein 19 OS=Mus musculus GN=Sh3d19 PE=1 SV=2	6.48387	4.18251	2	3	0	789	0	0	0	1	1	0	NA	NA	NA	NA	NA	NA	14000000	NA	12000000	NA	NA	NA		Pf00018, Pf07653, Pf14604	0.116	9.51057
Slc25a4	IsMasterProteinCandidate	11739	High	Q8BVI9	Putative uncharacterized protein OS=Mus musculus GN=Slc25a4 PE=2 SV=1	64.6011	19.1275	7	184	0	298	0	0	-1	0	1	1	NA	NA	NA	NA	NA	6900000	NA	NA	5900000	NA	10000000	NA		Pf00153	4.012	306.997
Slc25a4	IsMasterProtein	11739	High	P48962	ADP/ATP translocase 1 OS=Mus musculus GN=Slc25a4 PE=1 SV=4	64.6011	19.1275	7	184	0	298	0	0	-1	0	1	1	NA	NA	NA	NA	NA	6900000	NA	NA	5900000	NA	10000000	NA		Pf00153	4.012	306.997
Slk	IsMasterProteinCandidate	20874	High	A2RRK3	Slk protein OS=Mus musculus GN=Slk PE=2 SV=1	5.33152	1.41431	1	7	0.000200361	1202	0	-1	0	0	1	1	14000000	5500000	NA	4800000	NA	NA	13000000	6700000	16000000	NA	19000000	NA		Pf00069, Pf07714, Pf12474, Pf14531	0.044	16.437
Slk	IsMasterProtein	20874	High	O54988	STE20-like serine/threonine-protein kinase OS=Mus musculus GN=Slk PE=1 SV=2	5.33152	1.37875	1	7	0.000200361	1233	0	-1	0	0	1	1	14000000	5500000	NA	4800000	NA	NA	13000000	6700000	16000000	NA	19000000	NA		Pf00069, Pf07714, Pf12474, Pf14531	0.044	16.437
Snap91	None	20616	High	Q8BQA2	Putative uncharacterized protein OS=Mus musculus GN=Snap91 PE=2 SV=1	3.31614	4.16667	1	2	0.00463281	288	0	0	0	1	1	0	NA	NA	NA	NA	NA	NA	15000000	NA	15000000	NA	NA	NA		Pf01417, Pf07651	0.155	0
Snap91	None	20616	High	Q3TWS4	Clathrin coat assembly protein AP180 OS=Mus musculus GN=Snap91 PE=2 SV=1	3.31614	2.06186	1	2	0.00463281	582	0	0	0	1	1	0	NA	NA	NA	NA	NA	NA	15000000	NA	15000000	NA	NA	NA		Pf01417, Pf07651	0.129	0
Snap91	None	20616	High	Q3UI39	Putative uncharacterized protein OS=Mus musculus GN=Snap91 PE=2 SV=1	3.31614	1.43198	1	2	0.00463281	838	0	0	0	1	1	0	NA	NA	NA	NA	NA	NA	15000000	NA	15000000	NA	NA	NA		Pf01417, Pf07651	0.122	0
Snap91	None	20616	High	E9Q9A3	Clathrin coat assembly protein AP180 OS=Mus musculus GN=Snap91 PE=1 SV=2	3.31614	1.43198	1	2	0.00463281	838	0	0	0	1	1	0	NA	NA	NA	NA	NA	NA	15000000	NA	15000000	NA	NA	NA		Pf01417, Pf07651	0.122	0
Snap91	None	20616	High	Q61548	Clathrin coat assembly protein AP180 OS=Mus musculus GN=Snap91 PE=1 SV=1	3.31614	1.33185	1	2	0.00463281	901	0	0	0	1	1	0	NA	NA	NA	NA	NA	NA	15000000	NA	15000000	NA	NA	NA		Pf01417, Pf07651	0.122	0
Spag9	IsMasterProteinCandidate	70834	High	E9PUD1	C-Jun-amino-terminal kinase-interacting protein 4 OS=Mus musculus GN=Spag9 PE=1 SV=1	4.82827	1.36869	1	3	0.000200361	1169	0	0	0	1	1	1	NA	NA	NA	NA	NA	NA	5900000	NA	7700000	NA	7100000	NA			0.043	9.32975
Spag9	IsMasterProteinCandidate	70834	High	B8X349	JNK-interacting leucine zipper protein long form OS=Mus musculus GN=Spag9 PE=2 SV=1	4.82827	1.21212	1	3	0.000200361	1320	0	0	0	1	1	1	NA	NA	NA	NA	NA	NA	5900000	NA	7700000	NA	7100000	NA		Pf09744	0.037	9.32975
Spag9	IsMasterProtein	70834	High	Q58A65	C-Jun-amino-terminal kinase-interacting protein 4 OS=Mus musculus GN=Spag9 PE=1 SV=2	4.82827	1.2112	1	3	0.000200361	1321	0	0	0	1	1	1	NA	NA	NA	NA	NA	NA	5900000	NA	7700000	NA	7100000	NA		Pf09744	0.036	9.32975
Src	IsMasterProteinCandidate	20779	High	Q80XU2	Non-specific protein-tyrosine kinase OS=Mus musculus GN=Src PE=2 SV=1	5.04701	2.99065	1	4	0.000200361	535	-1	0	0	1	1	1	NA	11000000	NA	NA	NA	NA	28000000	NA	29000000	NA	33000000	NA		Pf00017, Pf00018, Pf00069, Pf07653, Pf07714, Pf14604	0.116	11.0429
Src	IsMasterProtein	20779	High	P05480	Neuronal proto-oncogene tyrosine-protein kinase Src OS=Mus musculus GN=Src PE=1 SV=4	5.04701	2.95749	1	4	0.000200361	541	-1	0	0	1	1	1	NA	11000000	NA	NA	NA	NA	28000000	NA	29000000	NA	33000000	NA		Pf00017, Pf00018, Pf00069, Pf07653, Pf07714, Pf14604	0.11	11.0429
Stk25	None	59041	High	Q7TPV1	Serine/threonine kinase 25 (Yeast) OS=Mus musculus GN=Stk25 PE=2 SV=1	4.72354	3.75587	1	2	0.000200361	426	0	0	0	0	1	1	NA	NA	NA	NA	NA	NA	NA	NA	10000000	NA	17000000	NA		Pf00069, Pf06840, Pf07714	0.11	0
Surf4	IsMasterProtein	20932	High	Q64310	Surfeit locus protein 4 OS=Mus musculus GN=Surf4 PE=2 SV=1	6.83833	5.94796	1	5	0	269	0	0	0	0	1	1	NA	NA	NA	NA	NA	NA	3900000	2100000	3300000	NA	5900000	NA		Pf02077	0.468	17.3844
Syk	None	20963	High	Q3V3Q2	Putative uncharacterized protein OS=Mus musculus GN=Syk PE=2 SV=1	3.68846	5	1	2	0.00054338	280	0	0	0	1	1	0	NA	NA	NA	NA	NA	NA	14000000	NA	12000000	NA	NA	NA		Pf00017	0.212	0
Tomm70a	IsMasterProteinCandidate	28185	High	Q9CZW5	Mitochondrial import receptor subunit TOM70 OS=Mus musculus GN=Tomm70a PE=1 SV=2	7.28492	4.41899	2	3	0	611	0	0	0	1	0	1	NA	NA	NA	NA	NA	NA	47000000	NA	NA	NA	25000000	NA		Pf00515, Pf07719, Pf13414	0.186	2.07231
Tomm70a	IsMasterProteinCandidate	28185	High	Q3TSX8	Putative uncharacterized protein OS=Mus musculus GN=Tomm70a PE=2 SV=1	7.28492	4.41899	2	3	0	611	0	0	0	1	0	1	NA	NA	NA	NA	NA	NA	47000000	NA	NA	NA	25000000	NA		Pf00515, Pf07719, Pf13414	0.186	2.07231
Tomm70a	IsMasterProtein	28185	High	Q80TT4	MKIAA0719 protein (Fragment) OS=Mus musculus GN=Tomm70a PE=2 SV=1	7.28492	4.3131	2	3	0	626	0	0	0	1	0	1	NA	NA	NA	NA	NA	NA	47000000	NA	NA	NA	25000000	NA		Pf00515, Pf07719, Pf13414	0.179	2.07231
Tpm2	IsMasterProtein	22004	High	Q6PJ18	Tpm2 protein OS=Mus musculus GN=Tpm2 PE=2 SV=1	291.128	75.7042	34	1084	0	284	0	0	0	1	1	1	NA	NA	NA	NA	NA	NA	100000000	NA	11000000	NA	8100000	NA		Pf00261, Pf12718	999	2316.76
Tpm2	None	22004	High	Q61344	Beta-tropomyosin OS=Mus musculus GN=Tpm2 PE=2 SV=1	280.023	65.8451	31	1036	0	284	0	0	0	1	1	1	NA	NA	NA	NA	NA	NA	100000000	NA	11000000	NA	8100000	NA		Pf00261, Pf12718	656.933	2221.88
Trim26	IsMasterProteinCandidate	22670	High	B8JJ57	Tripartite motif-containing protein 26 (Fragment) OS=Mus musculus GN=Trim26 PE=4 SV=1	7.17488	10.6719	2	5	0	253	1	0	0	1	1	1	2400000	NA	NA	NA	NA	NA	2200000	NA	1400000	NA	3400000	NA		Pf00097, Pf00643, Pf05290, Pf13445, Pf13639, Pf13920, Pf13923, Pf14835, Pf15227	0.311	7.96707
Trim26	IsMasterProteinCandidate	22670	High	Q3TBW8	Putative uncharacterized protein OS=Mus musculus GN=Trim26 PE=2 SV=1	7.17488	9.54064	2	5	0	283	1	0	0	1	1	1	2400000	NA	NA	NA	NA	NA	2200000	NA	1400000	NA	3400000	NA		Pf00097, Pf00643, Pf05290, Pf13445, Pf13639, Pf13920, Pf13923, Pf14835, Pf15227	0.274	7.96707
Trim26	IsMasterProteinCandidate	22670	High	B8JJ56	Tripartite motif-containing protein 26 (Fragment) OS=Mus musculus GN=Trim26 PE=4 SV=1	7.17488	6.85279	2	5	0	394	1	0	0	1	1	1	2400000	NA	NA	NA	NA	NA	2200000	NA	1400000	NA	3400000	NA		Pf00097, Pf00643, Pf13445, Pf13639, Pf13765, Pf13920, Pf13923, Pf14634, Pf14835, Pf15227	0.222	7.96707
Trim26	IsMasterProteinCandidate	22670	High	Q99PN3	Tripartite motif-containing protein 26 OS=Mus musculus GN=Trim26 PE=2 SV=3	7.17488	4.95413	2	5	0	545	1	0	0	1	1	1	2400000	NA	NA	NA	NA	NA	2200000	NA	1400000	NA	3400000	NA		Pf00097, Pf00622, Pf00643, Pf05290, Pf13445, Pf13639, Pf13765, Pf13920, Pf13923, Pf14634, Pf14835, Pf15227	0.212	7.96707
Trim26	IsMasterProteinCandidate	22670	High	Q3UFX3	Putative uncharacterized protein OS=Mus musculus GN=Trim26 PE=2 SV=1	7.17488	4.95413	2	5	0	545	1	0	0	1	1	1	2400000	NA	NA	NA	NA	NA	2200000	NA	1400000	NA	3400000	NA		Pf00097, Pf00622, Pf00643, Pf05290, Pf13445, Pf13639, Pf13765, Pf13920, Pf13923, Pf14634, Pf14835, Pf15227	0.212	7.96707
Ttn	None	22138	High	A2AT70	Titin (Fragment) OS=Mus musculus GN=Ttn PE=1 SV=1	6.16286	0.616016	2	3	0.000200361	3409	0	0	0	0	1	1	NA	NA	NA	NA	NA	NA	NA	NA	7800000	NA	23000000	NA		Pf00047, Pf07679, Pf07686, Pf13895, Pf13927	0.015	0
Tubal3	IsMasterProtein	238463	High	Q3UX10	Tubulin alpha chain-like 3 OS=Mus musculus GN=Tubal3 PE=2 SV=2	20.6236	9.64126	4	38	0	446	0	0	0	0	1	1	NA	NA	NA	NA	NA	NA	NA	NA	9800000	NA	31000000	NA		Pf00091, Pf03953	0.73	50.6477
Ugt1a7c	IsMasterProtein	394432	High	Q6ZQM8	UDP-glucuronosyltransferase 1-7C OS=Mus musculus GN=Ugt1a7c PE=2 SV=1	8.08157	4.33145	2	8	0	531	0	0	0	1	0	1	45000000	89000000	NA	NA	39000000	35000000	37000000	NA	99000000	30000000	30000000	NA		Pf00201, Pf04101	0.311	7.58301
Wdsub1	IsMasterProteinCandidate	72137	High	A2AUX8	WD repeat, SAM and U-box domain-containing protein 1 OS=Mus musculus GN=Wdsub1 PE=4 SV=1	3.47108	2.83688	1	2	0.00390071	423	0	0	0	1	1	0	NA	NA	NA	NA	NA	NA	2800000	NA	3400000	NA	NA	NA		Pf00400, Pf00536, Pf02198, Pf04564, Pf07647, Pf08662, Pf11768	0.194	0
Wdsub1	IsMasterProtein	72137	High	Q9D0I6	WD repeat, SAM and U-box domain-containing protein 1 OS=Mus musculus GN=Wdsub1 PE=2 SV=1	3.47108	2.53165	1	2	0.00390071	474	0	0	0	1	1	0	NA	NA	NA	NA	NA	NA	2800000	NA	3400000	NA	NA	NA		Pf00400, Pf00536, Pf02198, Pf04564, Pf07647, Pf11768, Pf11789	0.155	0
Wdsub1	IsMasterProtein	72137	High	Q9D0I6	WD repeat, SAM and U-box domain-containing protein 1 OS=Mus musculus GN=Wdsub1 PE=2 SV=1	3.47108	2.53165	1	2	0.00390071	474	0	0	0	1	1	0	NA	NA	NA	NA	NA	NA	2800000	NA	3400000	NA	NA	NA		Pf00400, Pf00536, Pf02198, Pf04564, Pf07647, Pf11768, Pf11789	0.155	0
