# Supplementary figures and images for: Opposing roles of nuclear receptor HNF4α isoforms in colitis and colitis-associated colon cancer
Source: eLife journal article supplement (doi:10.7554/elife.10903), 2016-05-11

Figure 5 – Figure supplement 1

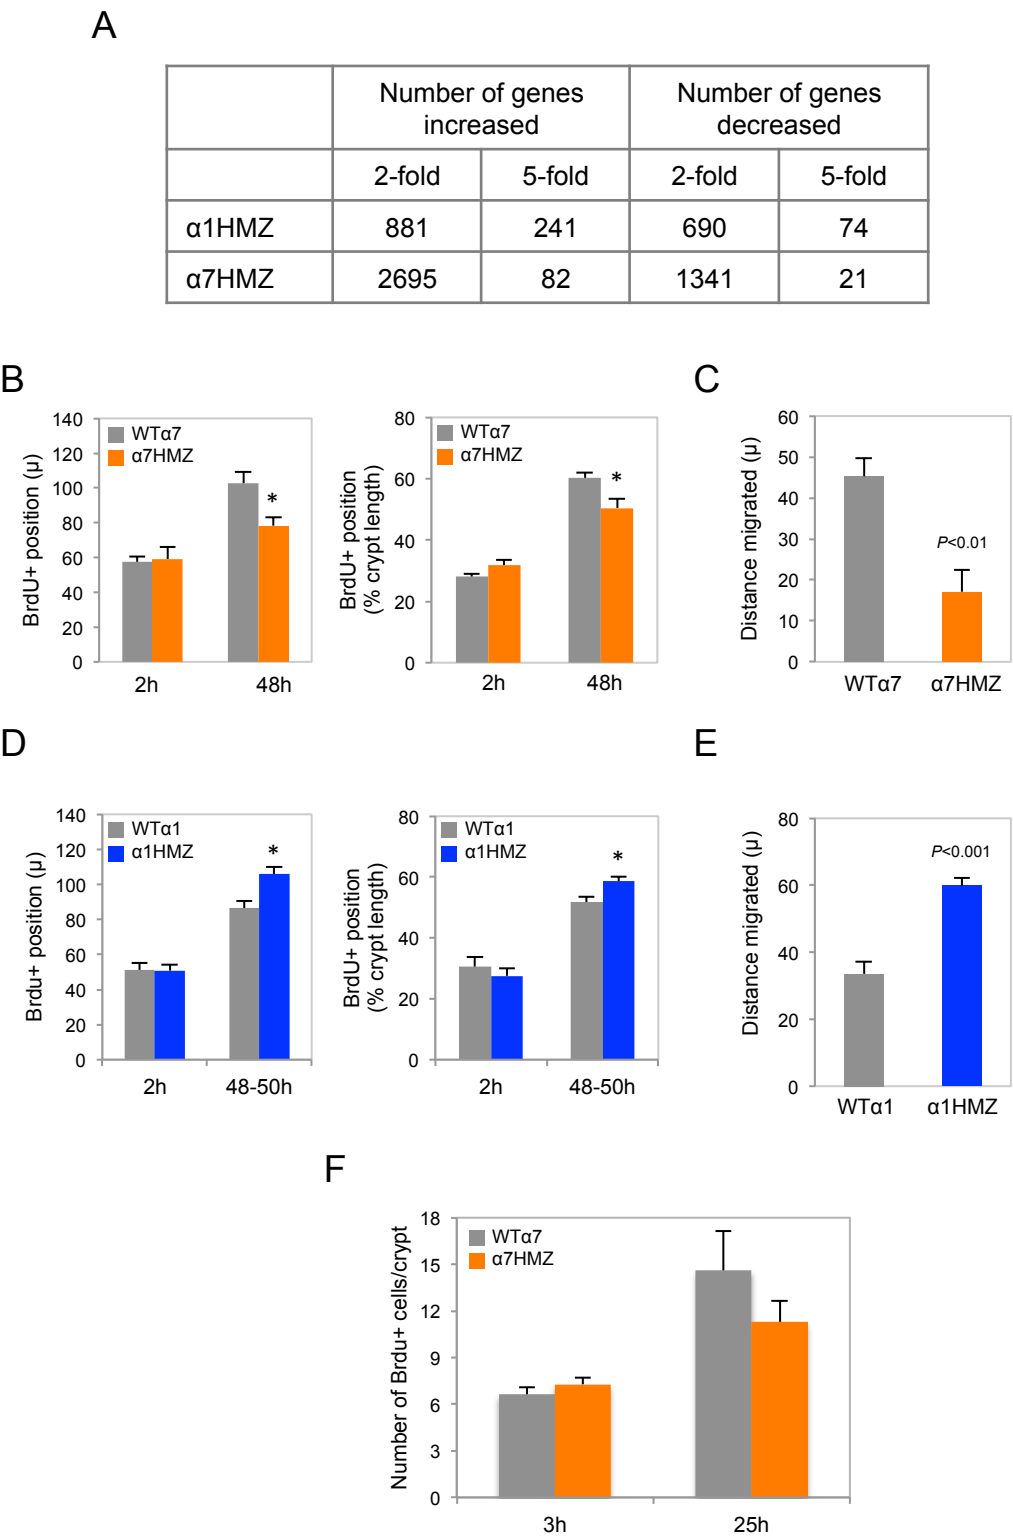

Supplement: supp [file elife-10903-supp-v1.zip]

Figure 4 – Figure supplement 2

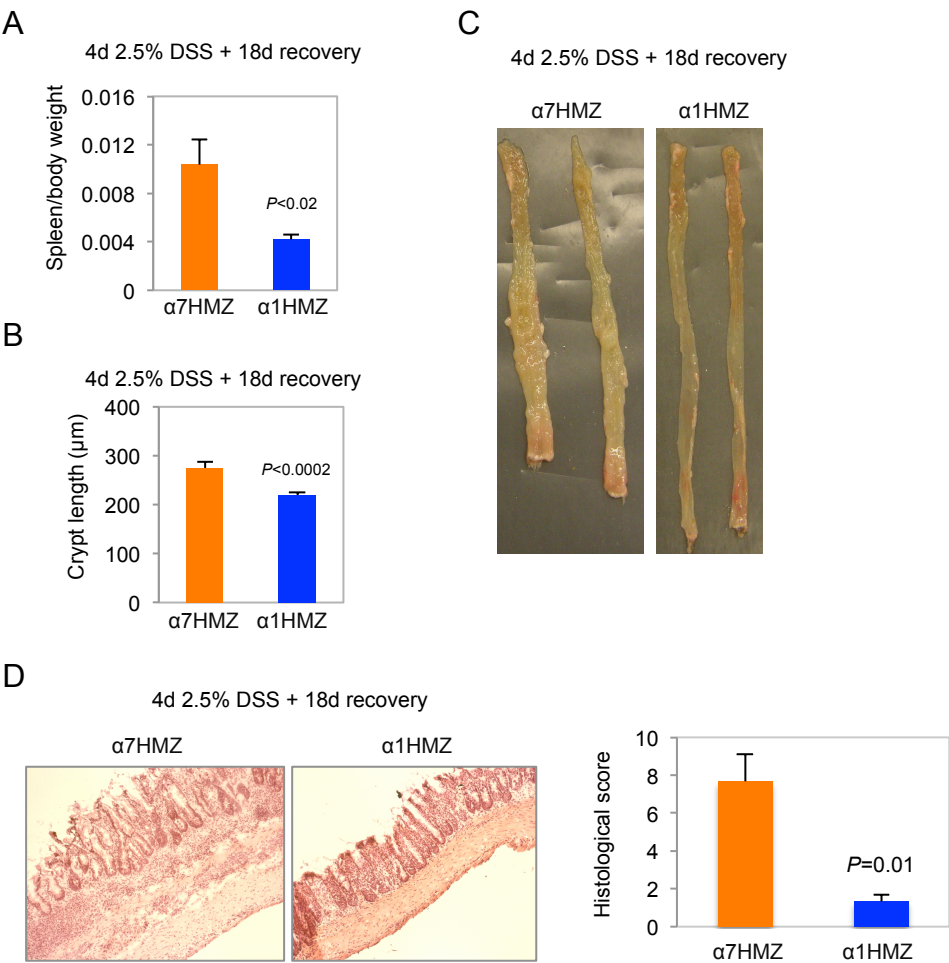

Supplement: supp [file elife-10903-supp-v1.zip]

Figure 6 – Figure supplement 1

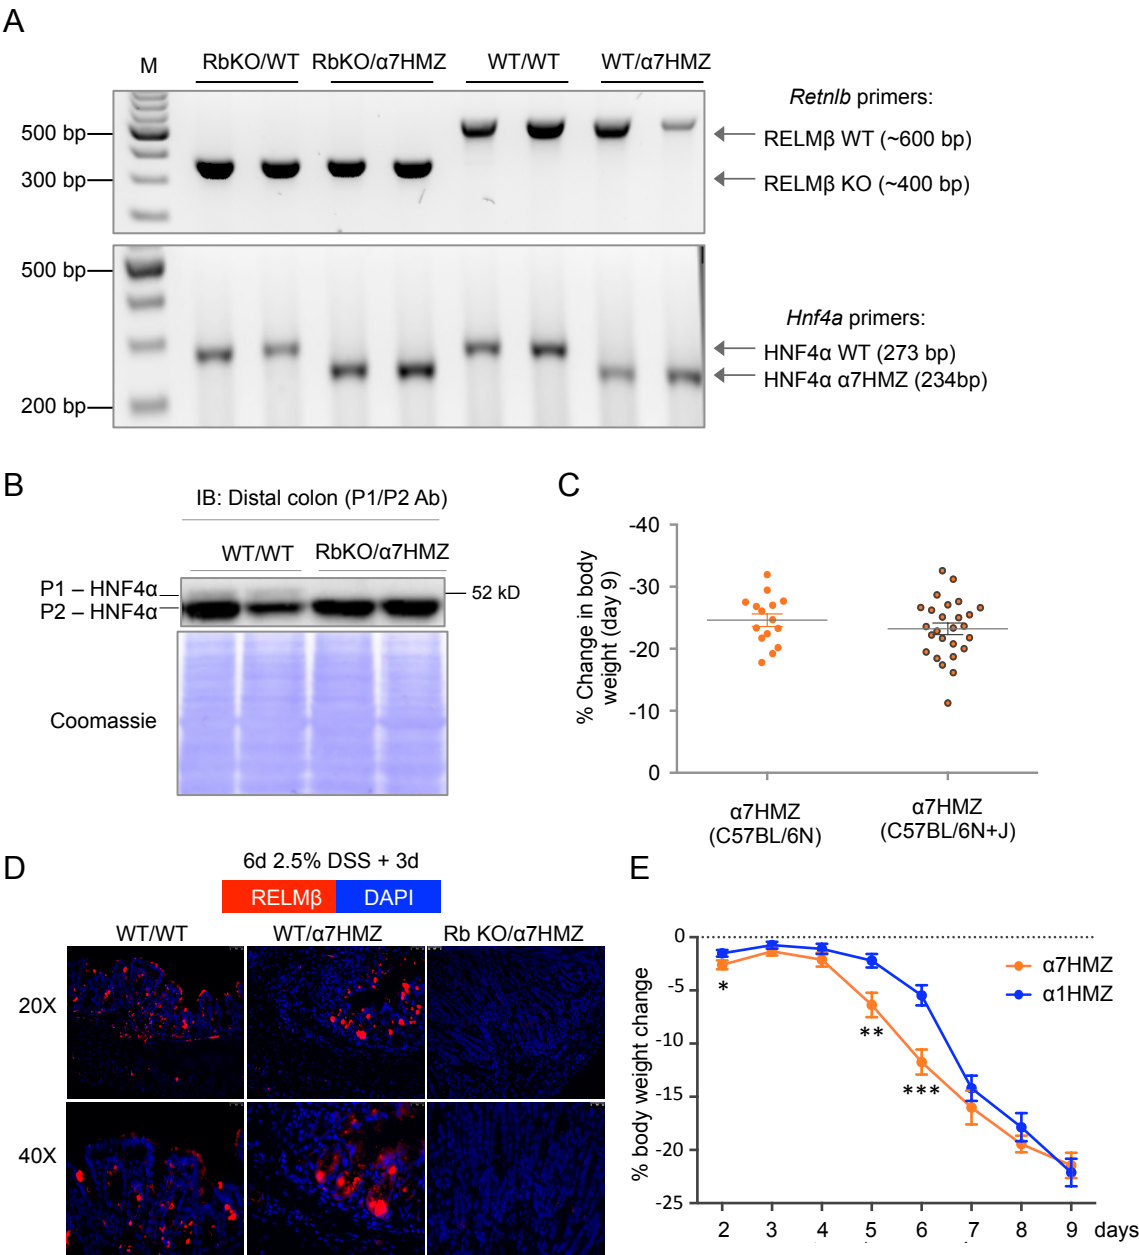

Supplement: supp [file elife-10903-supp-v1.zip]

Figure 4 – Figure supplement 1

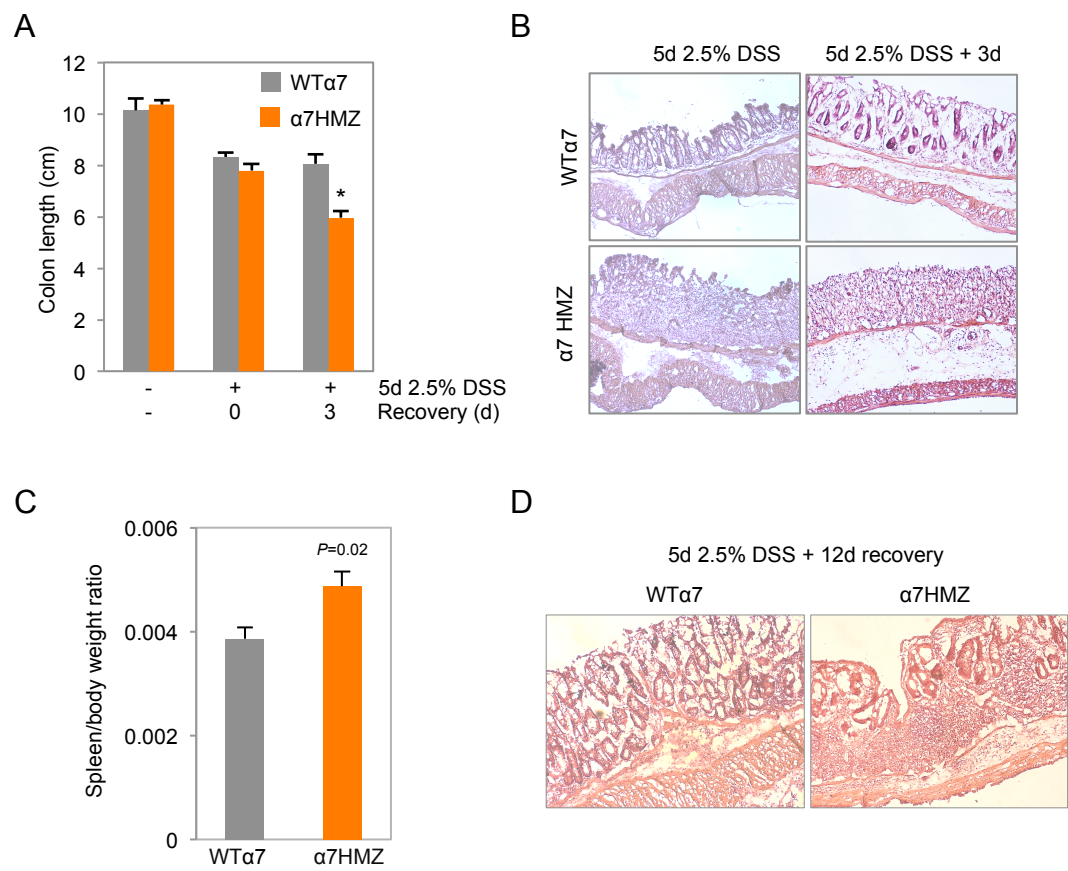

Supplement: supp [file elife-10903-supp-v1.zip]

Figure 3 – Figure supplement 1

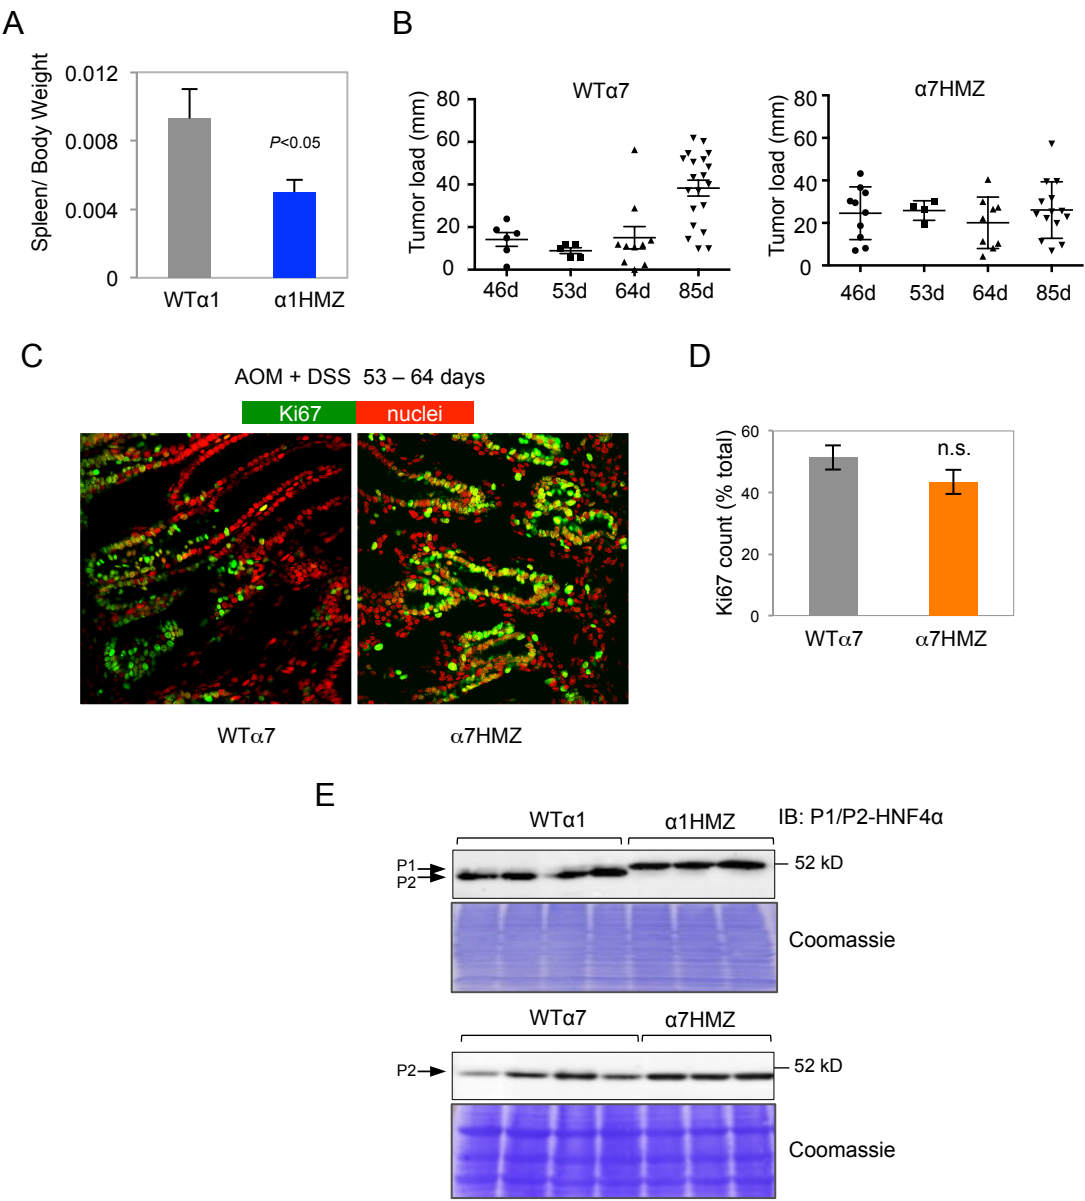

Supplement: supp [file elife-10903-supp-v1.zip]
